# Supplementary material for: Genome-wide SNP analysis of Plasmodium falciparum shows differentiation at drug-resistance-associated loci among malaria transmission settings in southern Mali
Source: Front Genet. 2022 Oct 4;13:943445. doi: 10.3389/fgene.2022.943445 (PMC9576839; doi:10.3389/fgene.2022.943445)
Supplement: Supplementary file 2 [file Table1.XLSX]

## Sheet: Table_S1.Geo-temp_#of Samples
Table S1. Number of samples analysed from different sites in Mali, collected between 2007 and 2017
Population	2007	2012	2013	2014	2015	2016	2017	Grand Total
Bamako		3	159					162
Bougoula-Hameau					22		19	41
Dangassa						158	8	166
Faladje	30		125	3	12	37	9	216
Kéniéroba						89		89
Kolle	47							47
Nioro					59	50		109
Grand Total	77	3	284	3	93	334	36	830

## Sheet: TableS2.Metadata for 830samples
sample	study	run_accessions	mean_coverage	avg_read_length	reads	reads_mapped	reads_qc_failed	Location
PM0001-C	1001-PF-ML-DJIMDE	ERR012350,ERR012360,ERR012305	68.9	36	48453780	43775226	0	Kolle
PM0002-C	1001-PF-ML-DJIMDE	ERR012520,ERR012331,ERR012327	21.94	36	14698244	12297905	0	Kolle
PM0003-C	1001-PF-ML-DJIMDE	ERR012492,ERR012457,ERR012532	57.39	37	39392666	35213846	0	Kolle
PM0004-C	1001-PF-ML-DJIMDE	ERR015438,ERR015329,ERR015422,ERR015315	22.52	75	9756048	6711737	0	Kolle
PM0005-C	1001-PF-ML-DJIMDE	ERR012392,ERR012318,ERR012271	38.55	36	28846202	23158198	0	Kolle
PM0006-C	1001-PF-ML-DJIMDE	ERR012451,ERR015319,ERR015340,ERR012497	199.27	75	74378651	64268727	0	Kolle
PM0007-C	1001-PF-ML-DJIMDE	ERR013225,ERR012465,ERR012501,ERR013247,ERR013252,ERR012236,ERR013192,ERR013262,ERR012417,ERR012379	60.95	37	49152034	33381610	0	Kolle
PM0008-C	1001-PF-ML-DJIMDE	ERR012471,ERR012266,ERR012488,ERR012261,ERR013258,ERR012283	76.49	37	50978206	39980096	0	Faladje
PM0009-C	1001-PF-ML-DJIMDE	ERR012792,ERR012690,ERR012769,ERR012824,ERR012704,ERR012656,ERR012683,ERR012687,ERR012787,ERR012854,ERR012670,ERR012779	126.62	36	113047638	90296462	0	Faladje
PM0014-C	1001-PF-ML-DJIMDE	ERR012768,ERR012809,ERR012849,ERR012839,ERR012706,ERR012859,ERR012707	94.34	36	70751526	61022574	0	Faladje
PM0015-C	1001-PF-ML-DJIMDE	ERR019937,ERR019936	23.89	53	11997951	9321381	0	Faladje
PM0017-C	1001-PF-ML-DJIMDE	ERR015436,ERR015339,ERR015397,ERR015337	97.49	75	33054071	28966832	0	Faladje
PM0020-C	1001-PF-ML-DJIMDE	ERR013230,ERR013240,ERR013215,ERR013257	95.71	75	36129448	29842340	0	Faladje
PM0021-C	1001-PF-ML-DJIMDE	ERR015406,ERR015432,ERR015335,ERR015428	43.13	75	20277132	13169020	0	Faladje
PM0022-C	1001-PF-ML-DJIMDE	ERR012358,ERR012268,ERR012267	51.34	37	33958000	30389227	0	Faladje
PM0023-C	1001-PF-ML-DJIMDE	ERR012286,ERR012367,ERR012299	29.24	36	21984310	18285339	0	Faladje
PM0026-C	1001-PF-ML-DJIMDE	ERR015345,ERR015367,ERR015388,ERR015348	22.62	75	11860654	6952386	0	Faladje
PM0033-C	1001-PF-ML-DJIMDE	ERR012410,ERR012463,ERR012461,ERR012502	43.7	46	24800475	19790942	0	Kolle
PM0034-C	1001-PF-ML-DJIMDE	ERR013197,ERR013223,ERR013204,ERR013205,ERR013221,ERR013219	64.61	75	30225428	17562918	0	Kolle
PM0036-C	1001-PF-ML-DJIMDE	ERR013254,ERR013250,ERR013209,ERR013200,ERR013232,ERR013255	65.25	75	35245408	21436182	0	Kolle
PM0037-C	1001-PF-ML-DJIMDE	ERR015416,ERR013227,ERR015418,ERR013249,ERR013260,ERR013229,ERR013210,ERR013236	33.62	75	18393332	9195550	0	Kolle
PM0038-C	1001-PF-ML-DJIMDE	ERR012386,ERR012369,ERR012309,ERR012408,ERR012262	68.54	57	39223796	29292823	0	Kolle
PM0039-C	1001-PF-ML-DJIMDE	ERR012366,ERR012495,ERR012235	30.05	37	20039364	17889285	0	Kolle
PM0040-C	1001-PF-ML-DJIMDE	ERR012844,ERR012724,ERR012823,ERR012717,ERR012677,ERR012814,ERR012702	68.4	36	67903360	43331399	0	Kolle
PM0042-C	1001-PF-ML-DJIMDE	ERR012306,ERR012335,ERR012248,ERR012342,ERR012500	170.25	65	80190114	72890066	0	Kolle
PM0047-C	1001-PF-ML-DJIMDE	ERR019935,ERR019934	98.4	53	47840698	44510469	0	Kolle
PM0048-C	1001-PF-ML-DJIMDE	ERR015357	175.6	75	59012831	56966971	0	Kolle
PM0049-C	1001-PF-ML-DJIMDE	ERR015377	215.74	75	67782429	66641330	0	Kolle
PM0051-C	1001-PF-ML-DJIMDE	ERR211527	25.72	99	6631746	5638113	0	Kolle
PM0054-C	1001-PF-ML-DJIMDE	ERR015382	35.99	75	13172475	11056576	0	Kolle
PM0058-C	1001-PF-ML-DJIMDE	ERR211514	23.12	99	6238280	5144819	0	Kolle
PM0060-C	1001-PF-ML-DJIMDE	ERR199985	11.14	99	3153779	2331929	0	Kolle
PM0062-C	1001-PF-ML-DJIMDE	ERR015425	148.11	75	48398187	46656194	0	Kolle
PM0063-C	1001-PF-ML-DJIMDE	ERR015328	17.1	75	5799593	4844463	0	Kolle
PM0064-C	1001-PF-ML-DJIMDE	ERR015392	131.18	75	42271076	40814036	0	Kolle
PM0068-C	1001-PF-ML-DJIMDE	ERR199986	16.64	99	4501457	3619555	0	Kolle
PM0071-C	1001-PF-ML-DJIMDE	ERR018900	137.99	75	44164774	43232140	0	Kolle
PM0072-C	1001-PF-ML-DJIMDE	ERR015409	109.87	75	35966276	34692802	0	Kolle
PM0073-C	1001-PF-ML-DJIMDE	ERR211482	91.98	99	22157653	21750013	0	Kolle
PM0074-C	1001-PF-ML-DJIMDE	ERR015391	196.74	75	62137810	60803547	0	Kolle
PM0075-C	1001-PF-ML-DJIMDE	ERR211478	93.43	99	22496408	22086442	0	Kolle
PM0076-C	1001-PF-ML-DJIMDE	ERR211466	70.67	99	16928337	16650597	0	Kolle
PM0077-C	1001-PF-ML-DJIMDE	ERR490336	42.57	99	12661677	10069109	0	Kolle
PM0078-C	1001-PF-ML-DJIMDE	ERR216456	74.72	99	19028820	17732005	0	Kolle
PM0083-C	1001-PF-ML-DJIMDE	ERR018901	131.48	75	42522011	40830266	0	Kolle
PM0084-C	1001-PF-ML-DJIMDE	ERR018902,ERR015423	393.16	75	128624835	125682926	0	Kolle
PM0085-C	1001-PF-ML-DJIMDE	ERR211520	13.3	99	3699999	2865365	0	Kolle
PM0086-C	1001-PF-ML-DJIMDE	ERR211451	14.43	99	3908643	3327823	0	Kolle
PM0087-C	1001-PF-ML-DJIMDE	ERR199988	9.99	99	2799665	2037612	0	Kolle
PM0089-C	1001-PF-ML-DJIMDE	ERR015434	83	75	26196962	24741901	0	Kolle
PM0090-C	1001-PF-ML-DJIMDE	ERR015325	84.49	75	27973634	25894712	0	Kolle
PM0093-C	1001-PF-ML-DJIMDE	ERR199989	18.33	99	4813343	4053253	0	Kolle
PM0094-C	1001-PF-ML-DJIMDE	ERR015353	106.52	75	33773746	32666269	0	Kolle
PM0096-C	1001-PF-ML-DJIMDE	ERR015424	176.8	75	58916719	56732774	0	Kolle
PM0097-C	1001-PF-ML-DJIMDE	ERR211517	30.58	99	8138465	6900971	0	Kolle
PM0098-C	1001-PF-ML-DJIMDE	ERR223048	234.09	99	56476258	55669792	0	Kolle
PM0100-C	1001-PF-ML-DJIMDE	ERR199990	25.15	99	6404356	5718390	0	Kolle
PM0103-C	1001-PF-ML-DJIMDE	ERR199991	17.97	99	4617174	4013851	0	Faladje
PM0113-C	1001-PF-ML-DJIMDE	ERR199992	15.21	99	3988731	3397823	0	Faladje
PM0114-C	1001-PF-ML-DJIMDE	ERR015314	135.92	75	44536519	41980103	0	Faladje
PM0115-C	1001-PF-ML-DJIMDE	ERR015420	55.04	75	20841434	16932444	0	Faladje
PM0117-C	1001-PF-ML-DJIMDE	ERR199993	24.47	99	6633062	5648709	0	Faladje
PM0123-C	1001-PF-ML-DJIMDE	ERR015354	201.92	75	64350149	62586543	0	Faladje
PM0124-C	1001-PF-ML-DJIMDE	ERR015371	140.55	75	45017789	43693082	0	Faladje
PM0127-C	1001-PF-ML-DJIMDE	ERR211459	11.8	99	3649672	2706477	0	Faladje
PM0129-C	1001-PF-ML-DJIMDE	ERR490335	18.79	99	6586470	4412773	0	Faladje
PM0132-C	1001-PF-ML-DJIMDE	ERR018903	180.34	75	57097545	55743131	0	Faladje
PM0133-C	1001-PF-ML-DJIMDE	ERR018898	66.6	75	21993678	20514792	0	Faladje
PM0134-C	1001-PF-ML-DJIMDE	ERR211479	100.28	99	24289428	23842850	0	Faladje
PM0136-C	1001-PF-ML-DJIMDE	ERR015435	177.54	75	57169672	55586413	0	Faladje
PM0138-C	1001-PF-ML-DJIMDE	ERR015408	66.29	75	23845103	20568974	0	Faladje
PM0139-C	1001-PF-ML-DJIMDE	ERR018899	199.03	75	62807187	61664879	0	Faladje
PM0142-C	1001-PF-ML-DJIMDE	ERR211484	46.03	99	11877805	10716440	0	Faladje
PM0144-C	1001-PF-ML-DJIMDE	ERR015322	79.49	75	26852069	24559091	0	Faladje
PM0145-C	1001-PF-ML-DJIMDE	ERR015317	210.61	75	66743120	65371054	0	Faladje
PM0146-C	1001-PF-ML-DJIMDE	ERR015415	81.28	75	29035220	25101706	0	Faladje
PM0147-C	1001-PF-ML-DJIMDE	ERR211474	74.52	99	18309042	17635754	0	Faladje
PM0182-C	1097-PF-ML-MAIGA	ERR636270	146.5	99	35282014	34673520	0	Faladje
PM0183-C	1097-PF-ML-MAIGA	ERR636276	157.43	99	37998188	37284028	0	Faladje
PM0184-C	1097-PF-ML-MAIGA	ERR636284	153.41	99	37225878	36307141	0	Faladje
PM0185-C	1097-PF-ML-MAIGA	ERR636202	169.01	99	40510257	39869422	0	Faladje
PM0186-C	1097-PF-ML-MAIGA	ERR636296	133.53	99	32866975	31643089	0	Faladje
PM0187-C	1097-PF-ML-MAIGA	ERR636302	131.26	99	32152064	31088167	0	Faladje
PM0188-C	1097-PF-ML-MAIGA	ERR636209	133.31	99	31687943	31137646	0	Faladje
PM0190-C	1097-PF-ML-MAIGA	ERR636216	139.96	99	33376402	32832311	0	Faladje
PM0191-C	1097-PF-ML-MAIGA	ERR636319	138.19	99	33296174	32548687	0	Faladje
PM0192-C	1097-PF-ML-MAIGA	ERR636218	148.04	99	34501201	34042625	0	Faladje
PM0193-C	1097-PF-ML-MAIGA	ERR636329	145.63	99	35299631	34538965	0	Faladje
PM0194-C	1097-PF-ML-MAIGA	ERR636271	144.37	99	35626489	34177482	0	Faladje
PM0195-C	1097-PF-ML-MAIGA	ERR636277	138.43	99	38192131	32818822	0	Faladje
PM0196-C	1097-PF-ML-MAIGA	ERR636285	161.07	99	38992882	38303662	0	Faladje
PM0197-C	1097-PF-ML-MAIGA	ERR636291	157.94	99	38281971	37394914	0	Faladje
PM0198-C	1097-PF-ML-MAIGA	ERR636297	145.96	99	35100003	34479927	0	Faladje
PM0199-C	1097-PF-ML-MAIGA	ERR636205	150.43	99	35988532	35274182	0	Faladje
PM0200-C	1097-PF-ML-MAIGA	ERR636210	133.51	99	31493240	30973217	0	Faladje
PM0201-C	1097-PF-ML-MAIGA	ERR636214	157.47	99	37673921	37082182	0	Faladje
PM0202-C	1097-PF-ML-MAIGA	ERR636313	154.21	99	37064385	36433848	0	Faladje
PM0203-C	1097-PF-ML-MAIGA	ERR636320	144.01	99	34874821	34058899	0	Faladje
PM0204-C	1097-PF-ML-MAIGA	ERR636325	161.4	99	38786635	38176841	0	Faladje
PM0205-C	1097-PF-ML-MAIGA	ERR636330	150.81	99	38333208	35610493	0	Faladje
PM0206-C	1097-PF-ML-MAIGA	ERR636272	156.49	99	37747934	37063663	0	Faladje
PM0207-C	1097-PF-ML-MAIGA	ERR636278	136.37	99	32743870	32194963	0	Faladje
PM0208-C	1097-PF-ML-MAIGA	ERR636201	153.36	99	37195821	36607656	0	Faladje
PM0209-C	1097-PF-ML-MAIGA	ERR636292	154.59	99	38997884	36627460	0	Faladje
PM0211-C	1097-PF-ML-MAIGA	ERR636303	135.28	99	32543830	31950916	0	Faladje
PM0212-C	1097-PF-ML-MAIGA	ERR636211	133.37	99	31514197	31018684	0	Faladje
PM0213-C	1097-PF-ML-MAIGA	ERR636309	173.43	99	42288425	41169847	0	Faladje
PM0214-C	1097-PF-ML-MAIGA	ERR636314	146.9	99	36034989	34715831	0	Faladje
PM0215-C	1097-PF-ML-MAIGA	ERR636321	129.32	99	33866360	30511938	0	Faladje
PM0216-C	1097-PF-ML-MAIGA	ERR636326	128.96	99	36344795	30352508	0	Faladje
PM0217-C	1097-PF-ML-MAIGA	ERR636221	148.57	99	35894046	34177510	0	Faladje
PM0218-C	1097-PF-ML-MAIGA	ERR636273	146.18	99	37156100	34603661	0	Faladje
PM0219-C	1097-PF-ML-MAIGA	ERR636279	80.27	99	29039903	18930721	0	Faladje
PM0220-C	1097-PF-ML-MAIGA	ERR636286	143.65	99	34537313	33928003	0	Faladje
PM0221-C	1097-PF-ML-MAIGA	ERR636293	148.26	99	38789342	35235391	0	Faladje
PM0222-C	1097-PF-ML-MAIGA	ERR636298	143.78	99	35320205	33960363	0	Faladje
PM0223-C	1097-PF-ML-MAIGA	ERR636304	138.37	99	34292142	32625435	0	Faladje
PM0224-C	1097-PF-ML-MAIGA	ERR636212	136.56	99	32759032	31734699	0	Faladje
PM0227-C	1097-PF-ML-MAIGA	ERR636322	101.02	99	32540445	23675789	0	Faladje
PM0229-C	1097-PF-ML-MAIGA	ERR636331	144.06	99	39754205	34093623	0	Faladje
PM0230-C	1097-PF-ML-MAIGA	ERR636274	136.39	99	34971055	32219523	0	Faladje
PM0231-C	1097-PF-ML-MAIGA	ERR636280	79.99	99	29601350	18757600	0	Faladje
PM0232-C	1097-PF-ML-MAIGA	ERR636287	109.28	99	31217853	25769493	0	Faladje
PM0233-C	1097-PF-ML-MAIGA	ERR636294	113.39	99	31098713	26764167	0	Faladje
PM0234-C	1097-PF-ML-MAIGA	ERR636204	144.74	99	35771564	33931045	0	Faladje
PM0235-C	1097-PF-ML-MAIGA	ERR636206	138.48	99	33755469	32425668	0	Faladje
PM0236-C	1097-PF-ML-MAIGA	ERR636306	67.62	99	30187784	15746289	0	Faladje
PM0237-C	1097-PF-ML-MAIGA	ERR636310	125.81	99	32421721	29547028	0	Faladje
PM0238-C	1097-PF-ML-MAIGA	ERR636315	133.99	99	35820924	31738354	0	Faladje
PM0240-C	1097-PF-ML-MAIGA	ERR636327	152.44	99	36534647	35923924	0	Faladje
PM0241-C	1097-PF-ML-MAIGA	ERR636222	153.35	99	36352906	35735231	0	Faladje
PM0242-C	1097-PF-ML-MAIGA	ERR636275	150.83	99	36466579	35899960	0	Faladje
PM0243-C	1097-PF-ML-MAIGA	ERR636281	138.67	99	33459490	32834440	0	Faladje
PM0244-C	1097-PF-ML-MAIGA	ERR636288	147.14	99	35557457	34901261	0	Faladje
PM0246-C	1097-PF-ML-MAIGA	ERR636299	127.74	99	33676330	30321755	0	Faladje
PM0247-C	1097-PF-ML-MAIGA	ERR636207	160.75	99	38871627	38247384	0	Faladje
PM0248-C	1097-PF-ML-MAIGA	ERR636307	148.72	99	36718747	35154659	0	Faladje
PM0249-C	1097-PF-ML-MAIGA	ERR636311	141.55	99	34020015	33409663	0	Faladje
PM0250-C	1097-PF-ML-MAIGA	ERR636316	158.64	99	38400063	37641060	0	Faladje
PM0251-C	1097-PF-ML-MAIGA	ERR636323	165.41	99	40137117	39261093	0	Faladje
PM0252-C	1097-PF-ML-MAIGA	ERR636328	131.23	99	33824732	31115308	0	Faladje
PM0253-C	1097-PF-ML-MAIGA	ERR636223	155.32	99	37946101	36520059	0	Faladje
PM0254-C	1097-PF-ML-MAIGA	ERR636199	168.13	99	42031319	39914706	0	Faladje
PM0255-C	1097-PF-ML-MAIGA	ERR636282	123.96	99	32106210	29289367	0	Faladje
PM0256-C	1097-PF-ML-MAIGA	ERR636289	135.55	99	33452718	32083129	0	Faladje
PM0257-C	1097-PF-ML-MAIGA	ERR636203	154.26	99	37249736	36013251	0	Faladje
PM0258-C	1097-PF-ML-MAIGA	ERR636300	134.09	99	34532115	31653816	0	Faladje
PM0259-C	1097-PF-ML-MAIGA	ERR636208	130.44	99	31859660	30446971	0	Faladje
PM0260-C	1097-PF-ML-MAIGA	ERR636308	125.66	99	33594750	29654074	0	Faladje
PM0261-C	1097-PF-ML-MAIGA	ERR636312	115.96	99	34149822	27611098	0	Faladje
PM0262-C	1097-PF-ML-MAIGA	ERR636317	144.94	99	38413019	34237902	0	Faladje
PM0263-C	1097-PF-ML-MAIGA	ERR636217	132.75	99	33496145	30710267	0	Faladje
PM0264-C	1097-PF-ML-MAIGA	ERR636220	137.26	99	33628959	31739740	0	Faladje
PM0265-C	1097-PF-ML-MAIGA	ERR636224	177.47	99	43709498	41887935	0	Faladje
PM0266-C	1097-PF-ML-MAIGA	ERR636200	109.11	99	26414054	25560518	0	Faladje
PM0267-C	1097-PF-ML-MAIGA	ERR636283	148.52	99	35678917	35026698	0	Faladje
PM0268-C	1097-PF-ML-MAIGA	ERR636290	147.62	99	35531070	34942277	0	Faladje
PM0269-C	1097-PF-ML-MAIGA	ERR636295	142.04	99	33897633	33292496	0	Faladje
PM0270-C	1097-PF-ML-MAIGA	ERR636301	153.46	99	37962141	36278947	0	Faladje
PM0271-C	1097-PF-ML-MAIGA	ERR636305	140.65	99	33996748	33222549	0	Faladje
PM0272-C	1097-PF-ML-MAIGA	ERR636213	138.59	99	33090201	32481999	0	Faladje
PM0273-C	1097-PF-ML-MAIGA	ERR636215	148.03	99	35304355	34606038	0	Faladje
PM0274-C	1097-PF-ML-MAIGA	ERR636318	150.51	99	36354712	35672177	0	Faladje
PM0275-C	1097-PF-ML-MAIGA	ERR636324	145.89	99	35115030	34465915	0	Faladje
PM0276-C	1097-PF-ML-MAIGA	ERR636332	161.58	99	38764457	38153501	0	Faladje
PM0277-C	1097-PF-ML-MAIGA	ERR636176	159.71	99	38370520	37696263	0	Faladje
PM0278-C	1097-PF-ML-MAIGA	ERR636180	146.39	99	35006478	34266002	0	Faladje
PM0279-C	1097-PF-ML-MAIGA	ERR636181	128.7	99	35075077	30103873	0	Faladje
PM0280-C	1097-PF-ML-MAIGA	ERR636183	12.11	99	28418686	2624121	0	Faladje
PM0281-C	1097-PF-ML-MAIGA	ERR636235	39.17	99	37727081	8265009	0	Faladje
PM0282-C	1097-PF-ML-MAIGA	ERR636237	10.63	99	38699917	1964210	0	Faladje
PM0283-C	1097-PF-ML-MAIGA	ERR636241	14.83	99	33248409	2850193	0	Faladje
PM0287-C	1097-PF-ML-MAIGA	ERR636247	8.28	99	39963676	1504275	0	Faladje
PM0290-C	1097-PF-ML-MAIGA	ERR636227	14.67	99	35839699	2939987	0	Faladje
PM0291-C	1097-PF-ML-MAIGA	ERR636230	32.64	99	36506766	7177309	0	Faladje
PM0293-C	1097-PF-ML-MAIGA	ERR636236	87.66	99	38994732	19483629	0	Faladje
PM0295-C	1097-PF-ML-MAIGA	ERR636242	39.91	99	33729546	8089710	0	Faladje
PM0296-C	1097-PF-ML-MAIGA	ERR636244	21.54	99	36588821	4262098	0	Faladje
PM0297-C	1097-PF-ML-MAIGA	ERR636190	14.83	99	31559305	3319981	0	Faladje
PM0299-C	1097-PF-ML-MAIGA	ERR636196	14.54	99	33888680	3248499	0	Faladje
PM0300-C	1097-PF-ML-MAIGA	ERR636225	33.76	99	36379218	7287210	0	Faladje
PM0301-C	1097-PF-ML-MAIGA	ERR636177	12.6	99	30584020	2770923	0	Faladje
PM0302-C	1097-PF-ML-MAIGA	ERR636228	8.55	99	33913971	1646571	0	Faladje
PM0303-C	1097-PF-ML-MAIGA	ERR636231	8.49	99	40707505	1680781	0	Faladje
PM0305-C	1097-PF-ML-MAIGA	ERR636184	8.68	99	28081799	1903139	0	Faladje
PM0306-C	1097-PF-ML-MAIGA	ERR636239	22.26	99	41700106	4739414	0	Faladje
PM0307-C	1097-PF-ML-MAIGA	ERR636186	19.48	99	32695690	4450502	0	Faladje
PM0308-C	1097-PF-ML-MAIGA	ERR636188	82.94	99	31954947	19565632	0	Faladje
PM0309-C	1097-PF-ML-MAIGA	ERR636191	144.94	99	39476845	34281241	0	Faladje
PM0310-C	1097-PF-ML-MAIGA	ERR636194	120.49	99	33073273	28559180	0	Faladje
PM0311-C	1097-PF-ML-MAIGA	ERR636197	87.25	99	23734428	20468537	0	Faladje
PM0312-C	1097-PF-ML-MAIGA	ERR636334	99.53	99	26666945	23504642	0	Faladje
PM0313-C	1097-PF-ML-MAIGA	ERR636178	92.92	99	35700642	21827777	0	Faladje
PM0314-C	1097-PF-ML-MAIGA	ERR636229	176.81	99	43402871	40982053	0	Faladje
PM0315-C	1097-PF-ML-MAIGA	ERR636182	82.27	99	32356213	19193233	0	Faladje
PM0316-C	1097-PF-ML-MAIGA	ERR636234	182.33	99	44119893	41854149	0	Faladje
PM0317-C	1097-PF-ML-MAIGA	ERR636185	138.83	99	38146320	32754185	0	Faladje
PM0318-C	1097-PF-ML-MAIGA	ERR636240	183.69	99	43385097	41827212	0	Faladje
PM0319-C	1097-PF-ML-MAIGA	ERR636187	143.56	99	34624548	33927195	0	Faladje
PM0320-C	1097-PF-ML-MAIGA	ERR636189	184.96	99	44412949	43739092	0	Faladje
PM0321-C	1097-PF-ML-MAIGA	ERR636192	29.49	99	8385530	6797216	0	Faladje
PM0322-C	1097-PF-ML-MAIGA	ERR636195	176.46	99	43091767	41861307	0	Faladje
PM0323-C	1097-PF-ML-MAIGA	ERR636198	6.64	99	31950031	1436369	0	Faladje
PM0324-C	1097-PF-ML-MAIGA	ERR636175	102.47	99	27588625	23887036	0	Faladje
PM0325-C	1097-PF-ML-MAIGA	ERR636179	136.15	99	34973312	31876066	0	Faladje
PM0326-C	1127-PF-ML-SOULEYMANE	ERR666852	197.61	99	49414280	46812056	0	Bamako
PM0327-C	1127-PF-ML-SOULEYMANE	ERR666854	8.66	99	4914350	1959460	0	Bamako
PM0328-C	1127-PF-ML-SOULEYMANE	ERR666855	11.1	99	5358221	2539965	0	Bamako
PM0331-C	1127-PF-ML-SOULEYMANE	ERR666890	142.3	99	33957800	33398679	0	Bamako
PM0332-C	1127-PF-ML-SOULEYMANE	ERR666856	65.87	99	15841766	15519984	0	Bamako
PM0333-C	1127-PF-ML-SOULEYMANE	ERR666903	137.18	99	32723882	32236779	0	Bamako
PM0334-C	1127-PF-ML-SOULEYMANE	ERR662077	180.82	99	43306219	42635297	0	Bamako
PM0335-C	1127-PF-ML-SOULEYMANE	ERR662078	159.1	99	38140759	37532238	0	Bamako
PM0336-C	1127-PF-ML-SOULEYMANE	ERR666866	152.89	99	36690299	36062958	0	Bamako
PM0338-C	1127-PF-ML-SOULEYMANE	ERR670354	163.05	99	39377246	38755326	0	Bamako
PM0339-C	1127-PF-ML-SOULEYMANE	ERR666897	169.01	99	40663026	39945646	0	Bamako
PM0340-C	1127-PF-ML-SOULEYMANE	ERR666911	162.52	99	39337441	38603154	0	Bamako
PM0341-C	1127-PF-ML-SOULEYMANE	ERR666887	156.8	98	38416972	37819239	0	Bamako
PM0342-C	1127-PF-ML-SOULEYMANE	ERR666913	159.49	99	38439856	37739948	0	Bamako
PM0343-C	1127-PF-ML-SOULEYMANE	ERR670394	134.58	99	32249267	31713511	0	Bamako
PM0344-C	1127-PF-ML-SOULEYMANE	ERR662074	140.55	99	33532952	33033397	0	Bamako
PM0345-C	1127-PF-ML-SOULEYMANE	ERR666863	157.63	99	37802990	37258684	0	Bamako
PM0346-C	1127-PF-ML-SOULEYMANE	ERR670397	160.46	99	38527349	37894860	0	Bamako
PM0347-C	1127-PF-ML-SOULEYMANE	ERR666865	151.74	99	36468085	35886829	0	Bamako
PM0349-C	1127-PF-ML-SOULEYMANE	ERR670364	150.81	99	35969656	35423965	0	Bamako
PM0350-C	1127-PF-ML-SOULEYMANE	ERR662070	158.51	99	37898549	37320291	0	Bamako
PM0351-C	1127-PF-ML-SOULEYMANE	ERR662083	184.63	99	44421030	43686564	0	Bamako
PM0352-C	1127-PF-ML-SOULEYMANE	ERR670370	149.19	99	35729246	35179846	0	Bamako
PM0355-C	1127-PF-ML-SOULEYMANE	ERR670373	167.56	99	39994269	39467703	0	Bamako
PM0356-C	1127-PF-ML-SOULEYMANE	ERR662062	165	99	39533381	38945820	0	Bamako
PM0357-C	1127-PF-ML-SOULEYMANE	ERR662075	129.17	99	30752073	30289059	0	Bamako
PM0358-C	1127-PF-ML-SOULEYMANE	ERR666893	161.51	99	38414345	37918256	0	Bamako
PM0359-C	1127-PF-ML-SOULEYMANE	ERR666917	159.19	99	38396680	37670555	0	Bamako
PM0360-C	1127-PF-ML-SOULEYMANE	ERR666918	164.71	99	39380245	38831526	0	Bamako
PM0361-C	1127-PF-ML-SOULEYMANE	ERR662068	164.77	99	39372601	38912847	0	Bamako
PM0363-C	1127-PF-ML-SOULEYMANE	ERR666909	151.88	99	36386527	35783771	0	Bamako
PM0364-C	1127-PF-ML-SOULEYMANE	ERR670371	155.24	99	37220443	36681010	0	Bamako
PM0365-C	1127-PF-ML-SOULEYMANE	ERR670356	143.2	99	34246756	33630693	0	Bamako
PM0366-C	1127-PF-ML-SOULEYMANE	ERR662086	157.19	99	37677266	37132561	0	Bamako
PM0367-C	1127-PF-ML-SOULEYMANE	ERR670374	138.68	99	33317021	32769626	0	Bamako
PM0368-C	1127-PF-ML-SOULEYMANE	ERR670383	135.73	99	32364709	31841398	0	Bamako
PM0369-C	1127-PF-ML-SOULEYMANE	ERR666878	168.01	99	40248400	39632107	0	Bamako
PM0370-C	1127-PF-ML-SOULEYMANE	ERR670398	152.02	99	36439740	35861254	0	Bamako
PM0372-C	1127-PF-ML-SOULEYMANE	ERR670363	144.08	99	34390620	33904571	0	Bamako
PM0374-C	1127-PF-ML-SOULEYMANE	ERR670390	140.18	99	33342412	32899849	0	Bamako
PM0375-C	1127-PF-ML-SOULEYMANE	ERR670369	145.67	99	34838171	34250013	0	Bamako
PM0377-C	1127-PF-ML-SOULEYMANE	ERR666888	180.06	99	43473777	42666194	0	Bamako
PM0378-C	1127-PF-ML-SOULEYMANE	ERR666914	160.87	99	38469849	37897895	0	Bamako
PM0379-C	1127-PF-ML-SOULEYMANE	ERR670357	142.9	99	34097701	33604690	0	Bamako
PM0380-C	1127-PF-ML-SOULEYMANE	ERR670384	142.83	99	34361353	33819171	0	Bamako
PM0381-C	1127-PF-ML-SOULEYMANE	ERR662076	153.41	99	36985494	36154949	0	Bamako
PM0382-C	1127-PF-ML-SOULEYMANE	ERR670388	159.97	99	38433720	37918859	0	Bamako
PM0383-C	1127-PF-ML-SOULEYMANE	ERR662091	146.98	99	35136509	34669578	0	Bamako
PM0384-C	1127-PF-ML-SOULEYMANE	ERR666894	142.92	99	34165432	33651843	0	Bamako
PM0385-C	1127-PF-ML-SOULEYMANE	ERR662069	153.19	99	36672081	36087642	0	Bamako
PM0386-C	1127-PF-ML-SOULEYMANE	ERR662082	140.09	99	33510435	33028433	0	Bamako
PM0387-C	1127-PF-ML-SOULEYMANE	ERR666910	150.95	99	36153510	35586080	0	Bamako
PM0390-C	1127-PF-ML-SOULEYMANE	ERR666860	102.91	99	37648845	24192163	0	Bamako
PM0391-C	1127-PF-ML-SOULEYMANE	ERR670396	137.21	99	32890332	32314001	0	Bamako
PM0392-C	1127-PF-ML-SOULEYMANE	ERR670375	151.83	99	36657862	36073666	0	Bamako
PM0393-C	1127-PF-ML-SOULEYMANE	ERR666916	150.63	99	36760740	35699305	0	Bamako
PM0394-C	1127-PF-ML-SOULEYMANE	ERR662064	164.96	99	39534272	38916706	0	Bamako
PM0395-C	1127-PF-ML-SOULEYMANE	ERR662092	169.99	99	40675676	40174563	0	Bamako
PM0396-C	1127-PF-ML-SOULEYMANE	ERR666867	144.24	99	34577104	33994276	0	Bamako
PM0397-C	1127-PF-ML-SOULEYMANE	ERR666869	159.23	99	38554994	37585922	0	Bamako
PM0398-C	1127-PF-ML-SOULEYMANE	ERR670367	155.21	99	37255423	36588029	0	Bamako
PM0399-C	1127-PF-ML-SOULEYMANE	ERR670392	129.57	99	30936966	30507817	0	Bamako
PM0400-C	1127-PF-ML-SOULEYMANE	ERR670393	128.26	99	30764449	30216386	0	Bamako
PM0403-C	1127-PF-ML-SOULEYMANE	ERR662087	172.59	99	41760297	41011433	0	Bamako
PM0405-C	1127-PF-ML-SOULEYMANE	ERR666892	143.45	99	34224764	33685510	0	Bamako
PM0406-C	1127-PF-ML-SOULEYMANE	ERR666864	152.87	99	36616954	36025279	0	Bamako
PM0408-C	1127-PF-ML-SOULEYMANE	ERR666868	136.6	99	33161914	32097180	0	Bamako
PM0410-C	1127-PF-ML-SOULEYMANE	ERR666908	140.45	99	33749124	33128525	0	Bamako
PM0411-C	1127-PF-ML-SOULEYMANE	ERR670378	145.28	99	34988340	34451186	0	Bamako
PM0412-C	1127-PF-ML-SOULEYMANE	ERR666912	158.78	99	38115507	37453998	0	Bamako
PM0413-C	1127-PF-ML-SOULEYMANE	ERR666872	152.42	99	36701667	36069643	0	Bamako
PM0414-C	1127-PF-ML-SOULEYMANE	ERR666915	154.16	99	38003724	36521203	0	Bamako
PM0415-C	1127-PF-ML-SOULEYMANE	ERR666891	137.08	99	32889734	32342536	0	Bamako
PM0416-C	1127-PF-ML-SOULEYMANE	ERR670359	142.16	99	34098357	33504803	0	Bamako
PM0417-C	1127-PF-ML-SOULEYMANE	ERR670360	138.45	99	33230125	32703691	0	Bamako
PM0418-C	1127-PF-ML-SOULEYMANE	ERR662090	144.56	99	34428954	33955865	0	Bamako
PM0419-C	1127-PF-ML-SOULEYMANE	ERR662093	165.75	99	39789345	39109162	0	Bamako
PM0420-C	1127-PF-ML-SOULEYMANE	ERR666853	14.16	99	3924694	3267623	0	Bamako
PM0421-C	1127-PF-ML-SOULEYMANE	ERR666871	143.49	99	34343271	33802444	0	Bamako
PM0422-C	1127-PF-ML-SOULEYMANE	ERR662084	166.52	99	40150153	39462277	0	Bamako
PM0423-C	1127-PF-ML-SOULEYMANE	ERR670379	150.94	99	36156513	35560499	0	Bamako
PM0424-C	1127-PF-ML-SOULEYMANE	ERR670395	132.05	99	31855048	31221928	0	Bamako
PM0425-C	1127-PF-ML-SOULEYMANE	ERR670385	154.93	99	37343266	36680820	0	Bamako
PM0426-C	1127-PF-ML-SOULEYMANE	ERR670376	156.63	99	37841217	37208585	0	Bamako
PM0427-C	1127-PF-ML-SOULEYMANE	ERR662089	168.61	99	40419903	39854225	0	Bamako
PM0428-C	1127-PF-ML-SOULEYMANE	ERR670399	156.98	99	38124828	37418203	0	Bamako
PM0429-C	1127-PF-ML-SOULEYMANE	ERR666857	469.3	99	117773668	115910968	0	Bamako
PM0432-C	1127-PF-ML-SOULEYMANE	ERR662071	152.04	99	36359238	35812237	0	Bamako
PM0433-C	1127-PF-ML-SOULEYMANE	ERR662073	171.35	99	41016831	40373791	0	Bamako
PM0434-C	1127-PF-ML-SOULEYMANE	ERR666885	146.42	99	35201278	34555370	0	Bamako
PM0435-C	1127-PF-ML-SOULEYMANE	ERR662085	164.16	99	39306536	38654183	0	Bamako
PM0436-C	1127-PF-ML-SOULEYMANE	ERR666873	125.8	99	30290948	29599683	0	Bamako
PM0437-C	1127-PF-ML-SOULEYMANE	ERR662088	321.46	99	79909234	78179585	0	Bamako
PM0438-C	1127-PF-ML-SOULEYMANE	ERR670387	149.5	99	36185443	35533665	0	Bamako
PM0440-C	1127-PF-ML-SOULEYMANE	ERR662079	175.97	99	42150872	41540158	0	Bamako
PM0441-C	1127-PF-ML-SOULEYMANE	ERR666919	161.56	99	39354839	38703459	0	Bamako
PM0442-C	1127-PF-ML-SOULEYMANE	ERR670401	141.01	99	33926270	33352249	0	Bamako
PM0444-C	1127-PF-ML-SOULEYMANE	ERR670366	139.66	99	34471314	32866158	0	Bamako
PM0445-C	1127-PF-ML-SOULEYMANE	ERR670391	135.98	99	32943167	32284710	0	Bamako
PM0446-C	1127-PF-ML-SOULEYMANE	ERR666859	146.85	99	35983855	34707473	0	Bamako
PM0447-C	1127-PF-ML-SOULEYMANE	ERR666889	170.61	99	42032183	40391455	0	Bamako
PM0448-C	1127-PF-ML-SOULEYMANE	ERR666923	147.97	99	36377100	35204770	0	Bamako
PM0449-C	1127-PF-ML-SOULEYMANE	ERR666862	150.63	99	36187680	35575690	0	Bamako
PM0451-C	1127-PF-ML-SOULEYMANE	ERR666925	136.7	99	32874779	32343502	0	Bamako
PM0452-C	1127-PF-ML-SOULEYMANE	ERR670361	143.43	99	34615719	33971542	0	Bamako
PM0453-C	1127-PF-ML-SOULEYMANE	ERR670377	157.35	99	37867380	37270109	0	Bamako
PM0454-C	1127-PF-ML-SOULEYMANE	ERR666927	153.82	99	37137773	36509210	0	Bamako
PM0455-C	1127-PF-ML-SOULEYMANE	ERR662081	174.39	99	42102842	41488712	0	Bamako
PM0456-C	1127-PF-ML-SOULEYMANE	ERR662072	147.98	99	35420146	34868821	0	Bamako
PM0457-C	1127-PF-ML-SOULEYMANE	ERR662058	167.62	99	40355621	39671312	0	Bamako
PM0458-C	1127-PF-ML-SOULEYMANE	ERR662060	161.42	99	38944672	38293994	0	Bamako
PM0459-C	1127-PF-ML-SOULEYMANE	ERR670380	164.14	99	39521631	38818110	0	Bamako
PM0460-C	1127-PF-ML-SOULEYMANE	ERR666902	135.08	99	32512477	31931512	0	Bamako
PM0461-C	1127-PF-ML-SOULEYMANE	ERR670386	152.4	99	36940528	36263869	0	Bamako
PM0463-C	1127-PF-ML-SOULEYMANE	ERR662065	176.69	99	43097753	42153342	0	Bamako
PM0464-C	1127-PF-ML-SOULEYMANE	ERR662067	131.59	99	31504823	31058699	0	Bamako
PM0466-C	1127-PF-ML-SOULEYMANE	ERR666928	132.88	99	31992141	31329779	0	Bamako
PM0467-C	1127-PF-ML-SOULEYMANE	ERR670365	142.41	99	34718683	33903533	0	Bamako
PM0468-C	1127-PF-ML-SOULEYMANE	ERR666896	151.33	99	36594291	35939080	0	Bamako
PM0469-C	1127-PF-ML-SOULEYMANE	ERR662059	135.26	99	32289775	31846326	0	Bamako
PM0470-C	1127-PF-ML-SOULEYMANE	ERR666886	153.12	99	36795462	36093986	0	Bamako
PM0471-C	1127-PF-ML-SOULEYMANE	ERR666922	158.15	99	37915166	37342996	0	Bamako
PM0472-C	1127-PF-ML-SOULEYMANE	ERR666924	133.09	99	31736125	31242628	0	Bamako
PM0473-C	1127-PF-ML-SOULEYMANE	ERR666875	138.45	99	33268829	32546305	0	Bamako
PM0475-C	1127-PF-ML-SOULEYMANE	ERR666881	166.55	99	40363178	39448137	0	Bamako
PM0476-C	1127-PF-ML-SOULEYMANE	ERR670362	148.79	99	35600428	34998131	0	Bamako
PM0478-C	1127-PF-ML-SOULEYMANE	ERR666929	142.14	99	34064816	33495684	0	Bamako
PM0479-Cx	1127-PF-ML-SOULEYMANE	ERR666858	159.53	99	41293084	37855409	0	Bamako
PM0480-C	1127-PF-ML-SOULEYMANE	ERR666898	151.22	99	36236770	35609265	0	Bamako
PM0481-C	1127-PF-ML-SOULEYMANE	ERR666921	148.93	99	36135936	35158684	0	Bamako
PM0482-C	1127-PF-ML-SOULEYMANE	ERR666900	140.86	99	34520514	33360276	0	Bamako
PM0483-C	1127-PF-ML-SOULEYMANE	ERR670358	131.15	99	31519146	30968430	0	Bamako
PM0484-C	1127-PF-ML-SOULEYMANE	ERR666904	144.95	99	34832645	34308632	0	Bamako
PM0485-C	1127-PF-ML-SOULEYMANE	ERR666879	174.43	99	42279853	41402565	0	Bamako
PM0486-C	1127-PF-ML-SOULEYMANE	ERR666882	148.01	99	35635410	34915028	0	Bamako
PM0487-C	1127-PF-ML-SOULEYMANE	ERR670389	154.9	99	37179001	36576875	0	Bamako
PM0488-C	1127-PF-ML-SOULEYMANE	ERR670400	136.86	99	32916259	32299845	0	Bamako
PM0489-C	1127-PF-ML-SOULEYMANE	ERR666930	136.31	99	33476120	32596921	0	Bamako
PM0490-C	1127-PF-ML-SOULEYMANE	ERR666931	153.72	99	37285368	36229353	0	Bamako
PM0491-C	1127-PF-ML-SOULEYMANE	ERR666920	138.63	99	34622237	32721849	0	Bamako
PM0492-C	1127-PF-ML-SOULEYMANE	ERR666899	146.15	99	35212681	34486440	0	Bamako
PM0493-C	1127-PF-ML-SOULEYMANE	ERR662061	162.85	99	39065135	38369357	0	Bamako
PM0494-C	1127-PF-ML-SOULEYMANE	ERR666861	145.67	99	35126723	34436102	0	Bamako
PM0495-C	1127-PF-ML-SOULEYMANE	ERR670382	153.18	99	36696871	36131524	0	Bamako
PM0496-C	1127-PF-ML-SOULEYMANE	ERR666876	161.18	99	39202258	38207235	0	Bamako
PM0497-C	1127-PF-ML-SOULEYMANE	ERR662063	174.14	99	41929414	41302584	0	Bamako
PM0498-C	1127-PF-ML-SOULEYMANE	ERR662066	147.95	99	35455004	34850230	0	Bamako
PM0499-C	1127-PF-ML-SOULEYMANE	ERR666906	150.51	99	36083785	35551224	0	Bamako
PM0500-C	1127-PF-ML-SOULEYMANE	ERR666926	145.76	99	34945487	34369964	0	Bamako
PM0501-C	1127-PF-ML-SOULEYMANE	ERR662080	169.49	99	41005894	40364917	0	Bamako
PM0502-C	1127-PF-ML-SOULEYMANE	ERR666895	148.36	99	35790960	35177587	0	Bamako
PM0503-C	1127-PF-ML-SOULEYMANE	ERR670355	152.13	99	36295806	35742349	0	Bamako
PM0504-C	1127-PF-ML-SOULEYMANE	ERR666884	143.02	99	34236160	33644990	0	Bamako
PM0505-C	1127-PF-ML-SOULEYMANE	ERR670372	163.34	99	39221743	38524382	0	Bamako
PM0506-C	1127-PF-ML-SOULEYMANE	ERR670381	157.52	99	38203535	37460741	0	Bamako
PM0510-C	1127-PF-ML-SOULEYMANE	ERR666905	149.83	99	36282975	35711324	0	Bamako
PM0511-C	1127-PF-ML-SOULEYMANE	ERR666907	144.07	99	34563723	33912761	0	Bamako
PM0512-C	1127-PF-ML-SOULEYMANE	ERR666883	138.94	99	33935706	32755589	0	Bamako
PM0513-C	1127-PF-ML-SOULEYMANE	ERR666870	139.81	99	33630070	33063313	0	Bamako
PM0514-C	1127-PF-ML-SOULEYMANE	ERR670368	141.66	99	33918642	33422304	0	Bamako
PM0517-C	1127-PF-ML-SOULEYMANE	ERR666901	128.33	99	30703914	30182556	0	Bamako
PM0518-C	1127-PF-ML-SOULEYMANE	ERR666874	139.46	99	33811660	32954754	0	Bamako
SPT00019	1164-PF-ML-DJIMDE-SM	ERR2894545	70.7	141	20866217	17797278	0	Bougoula-Hameau
SPT00022	1164-PF-ML-DJIMDE-SM	ERR2894548	78.51	141	18195209	17304302	0	Bougoula-Hameau
SPT00023	1164-PF-ML-DJIMDE-SM	ERR2894549	92.11	141	24700692	23160731	0	Bougoula-Hameau
SPT00025	1164-PF-ML-DJIMDE-SM	ERR2894550	102.08	138	30156353	28330966	0	Bougoula-Hameau
SPT00027	1164-PF-ML-DJIMDE-SM	ERR2894552	90.58	139	30287803	28243876	0	Bougoula-Hameau
SPT00031	1164-PF-ML-DJIMDE-SM	ERR2894556	77.56	141	19868248	18117539	0	Bougoula-Hameau
SPT00038	1164-PF-ML-DJIMDE-SM	ERR2894563	78.55	136	28530982	26874230	0	Bougoula-Hameau
SPT00041	1164-PF-ML-DJIMDE-SM	ERR2894566	84.25	142	35740425	32273556	0	Bougoula-Hameau
SPT00044	1164-PF-ML-DJIMDE-SM	ERR2894569	97.28	140	25570511	24429426	0	Bougoula-Hameau
SPT00046	1164-PF-ML-DJIMDE-SM	ERR2894571	130.18	139	36984976	35996699	0	Bougoula-Hameau
SPT00049	1164-PF-ML-DJIMDE-SM	ERR2894574	106.5	137	40630894	37189026	0	Bougoula-Hameau
SPT00053	1164-PF-ML-DJIMDE-SM	ERR2894578	100.39	140	24516176	23815319	0	Bougoula-Hameau
SPT00061	1164-PF-ML-DJIMDE-SM	ERR2894586	82.51	138	30016454	28393455	0	Bougoula-Hameau
SPT00064	1164-PF-ML-DJIMDE-SM	ERR2894589	87.1	128	41415851	40881752	0	Bougoula-Hameau
SPT00066	1164-PF-ML-DJIMDE-SM	ERR2894591	100.19	141	24294093	23680913	0	Bougoula-Hameau
SPT00067	1164-PF-ML-DJIMDE-SM	ERR2894592	93.71	137	32424904	30300266	0	Bougoula-Hameau
SPT00070	1164-PF-ML-DJIMDE-SM	ERR2894595	96.78	138	28917311	27748866	0	Bougoula-Hameau
SPT00073	1164-PF-ML-DJIMDE-SM	ERR2894598	76.78	144	26080093	22879942	0	Bougoula-Hameau
SPT00079	1164-PF-ML-DJIMDE-SM	ERR2894467	85.53	140	21111477	19977580	0	Bougoula-Hameau
SPT00082	1164-PF-ML-DJIMDE-SM	ERR2894470	66.27	141	16846858	14867473	0	Bougoula-Hameau
SPT00087	1164-PF-ML-DJIMDE-SM	ERR2894474	62.87	143	16722582	14743605	0	Bougoula-Hameau
SPT00089	1164-PF-ML-DJIMDE-SM	ERR2894476	68.53	138	20499339	18062838	0	Bougoula-Hameau
SPT00192	1164-PF-ML-DJIMDE-SM	ERR2894679	114.24	136	42090685	40838193	0	Faladje
SPT00195	1164-PF-ML-DJIMDE-SM	ERR2894648	100.84	142	20580206	20017334	0	Faladje
SPT00197	1164-PF-ML-DJIMDE-SM	ERR2894650	54.18	141	14675279	13675725	0	Faladje
SPT00199	1164-PF-ML-DJIMDE-SM	ERR2894652	78.1	141	16119997	15630465	0	Faladje
SPT00205	1164-PF-ML-DJIMDE-SM	ERR2894658	89.72	133	30149382	29492009	0	Faladje
SPT00207	1164-PF-ML-DJIMDE-SM	ERR2894660	97.29	138	29497372	27690494	0	Faladje
SPT00209	1164-PF-ML-DJIMDE-SM	ERR2894662	92.42	142	23104680	20944732	0	Faladje
SPT00211	1164-PF-ML-DJIMDE-SM	ERR2894664	212.77	141	71275632	70017891	0	Faladje
SPT00212	1164-PF-ML-DJIMDE-SM	ERR2894665	100.42	137	27407408	26713914	0	Faladje
SPT00214	1164-PF-ML-DJIMDE-SM	ERR2894667	93.69	136	32378001	31237683	0	Faladje
SPT00216	1164-PF-ML-DJIMDE-SM	ERR2894669	126.4	141	29672461	29002556	0	Faladje
SPT00219	1164-PF-ML-DJIMDE-SM	ERR2894672	121.69	133	63016338	60438976	0	Faladje
SPT00222	1164-PF-ML-DJIMDE-SM	ERR2894675	85.2	133	49351586	48504049	0	Faladje
SPT00752	1192-PF-ML-FAIRHURST-SM	ERR2299498	87.55	148	24250744	13351636	0	Kenieroba
SPT00753	1192-PF-ML-FAIRHURST-SM	ERR2299499	55.27	149	25032257	8060342	0	Kenieroba
SPT00759	1192-PF-ML-FAIRHURST-SM	ERR2299500	28.13	148	5604692	4080944	0	Kenieroba
SPT00761	1192-PF-ML-FAIRHURST-SM	ERR2299501	197.93	147	31918171	31466459	0	Kenieroba
SPT00763	1192-PF-ML-FAIRHURST-SM	ERR2299502	64.24	147	11323586	9835269	0	Kenieroba
SPT00764	1192-PF-ML-FAIRHURST-SM	ERR2299503	91.9	148	15473302	13975775	0	Kenieroba
SPT00768	1192-PF-ML-FAIRHURST-SM	ERR2299504	215.11	147	34686423	34242335	0	Kenieroba
SPT00769	1192-PF-ML-FAIRHURST-SM	ERR2299505	131.1	147	21525834	20380534	0	Kenieroba
SPT00770	1192-PF-ML-FAIRHURST-SM	ERR2299506	46.91	148	8636340	7062400	0	Kenieroba
SPT00772	1192-PF-ML-FAIRHURST-SM	ERR2299507	183.27	147	29593951	29138574	0	Kenieroba
SPT00773	1192-PF-ML-FAIRHURST-SM	ERR2299508	190.75	147	30988291	30519674	0	Kenieroba
SPT00775	1192-PF-ML-FAIRHURST-SM	ERR2299509	193.67	147	31341418	30904512	0	Kenieroba
SPT00778	1192-PF-ML-FAIRHURST-SM	ERR2299510	36.34	148	7090269	5339518	0	Kenieroba
SPT00779	1192-PF-ML-FAIRHURST-SM	ERR2299511	196.48	148	31041826	30637526	0	Kenieroba
SPT00782	1192-PF-ML-FAIRHURST-SM	ERR2299512	223.09	147	36124517	35665969	0	Kenieroba
SPT00784	1192-PF-ML-FAIRHURST-SM	ERR2299513	169.74	147	26910889	26471371	0	Kenieroba
SPT00788	1192-PF-ML-FAIRHURST-SM	ERR2299514	170.38	147	27618752	27141611	0	Kenieroba
SPT00789	1192-PF-ML-FAIRHURST-SM	ERR2299515	219.5	147	35833364	35329605	0	Kenieroba
SPT00790	1192-PF-ML-FAIRHURST-SM	ERR2299516	209.35	147	33910792	33428458	0	Kenieroba
SPT00791	1192-PF-ML-FAIRHURST-SM	ERR2299517	211.81	148	34327618	33696418	0	Kenieroba
SPT00792	1192-PF-ML-FAIRHURST-SM	ERR2299518	197.91	147	32200221	31718011	0	Kenieroba
SPT00794	1192-PF-ML-FAIRHURST-SM	ERR2299519	200.85	147	33214549	32808552	0	Kenieroba
SPT00795	1192-PF-ML-FAIRHURST-SM	ERR2299520	197.18	147	31729181	31278178	0	Kenieroba
SPT00796	1192-PF-ML-FAIRHURST-SM	ERR2299521	197.58	147	31563551	31021507	0	Kenieroba
SPT00797	1192-PF-ML-FAIRHURST-SM	ERR2299522	207.99	147	34145140	33605775	0	Kenieroba
SPT00798	1192-PF-ML-FAIRHURST-SM	ERR2299523	212.82	147	34271186	33898858	0	Kenieroba
SPT00800	1192-PF-ML-FAIRHURST-SM	ERR2299524	204.09	147	32616375	32079864	0	Kenieroba
SPT00801	1192-PF-ML-FAIRHURST-SM	ERR2299525	201.91	147	32518818	32092697	0	Kenieroba
SPT00802	1192-PF-ML-FAIRHURST-SM	ERR2299526	204.59	147	33593160	33136643	0	Kenieroba
SPT00803	1192-PF-ML-FAIRHURST-SM	ERR2299527	213.26	148	34357846	33855319	0	Kenieroba
SPT00804	1192-PF-ML-FAIRHURST-SM	ERR2299430	137.55	147	21867789	20953730	0	Kenieroba
SPT00807	1192-PF-ML-FAIRHURST-SM	ERR2299431	173.24	147	27779992	27076424	0	Kenieroba
SPT00808	1192-PF-ML-FAIRHURST-SM	ERR2299432	158.68	147	25280364	24431929	0	Kenieroba
SPT00809	1192-PF-ML-FAIRHURST-SM	ERR2299433	197.1	147	31164910	30597266	0	Kenieroba
SPT00810	1192-PF-ML-FAIRHURST-SM	ERR2299434	206.17	147	32817279	32269424	0	Kenieroba
SPT00811	1192-PF-ML-FAIRHURST-SM	ERR2299435	191.6	147	29597414	29058069	0	Kenieroba
SPT00813	1192-PF-ML-FAIRHURST-SM	ERR2299436	203.12	147	32774598	32150973	0	Kenieroba
SPT00815	1192-PF-ML-FAIRHURST-SM	ERR2299437	200.05	147	31670667	31146899	0	Kenieroba
SPT00817	1192-PF-ML-FAIRHURST-SM	ERR2299438	185.93	147	29326333	28811018	0	Kenieroba
SPT00818	1192-PF-ML-FAIRHURST-SM	ERR2299439	211.92	147	34223341	33649598	0	Kenieroba
SPT00819	1192-PF-ML-FAIRHURST-SM	ERR2299440	198.82	147	31689484	31109764	0	Kenieroba
SPT00820	1192-PF-ML-FAIRHURST-SM	ERR2299441	203.6	147	33114191	32618355	0	Kenieroba
SPT00821	1192-PF-ML-FAIRHURST-SM	ERR2299442	209.71	147	33611053	33134171	0	Kenieroba
SPT00822	1192-PF-ML-FAIRHURST-SM	ERR2299443	186.64	147	29975413	29515113	0	Kenieroba
SPT00824	1192-PF-ML-FAIRHURST-SM	ERR2299444	215.38	147	34186197	33594420	0	Kenieroba
SPT00825	1192-PF-ML-FAIRHURST-SM	ERR2299445	222.71	147	35703221	35116513	0	Kenieroba
SPT00826	1192-PF-ML-FAIRHURST-SM	ERR2299446	209.49	147	33660378	32990345	0	Kenieroba
SPT00827	1192-PF-ML-FAIRHURST-SM	ERR2299447	199.91	147	31892119	31386838	0	Kenieroba
SPT00828	1192-PF-ML-FAIRHURST-SM	ERR2299448	212.49	147	35209256	34576810	0	Kenieroba
SPT00829	1192-PF-ML-FAIRHURST-SM	ERR2299449	222.07	148	35053155	34559705	0	Kenieroba
SPT00830	1192-PF-ML-FAIRHURST-SM	ERR2299450	207.56	147	32986524	32568076	0	Kenieroba
SPT00831	1192-PF-ML-FAIRHURST-SM	ERR2299451	206.25	147	32360143	31831639	0	Kenieroba
SPT00832	1192-PF-ML-FAIRHURST-SM	ERR2299452	193.24	147	31080881	30569281	0	Kenieroba
SPT00833	1192-PF-ML-FAIRHURST-SM	ERR2299453	185.15	147	29308065	28835368	0	Kenieroba
SPT00834	1192-PF-ML-FAIRHURST-SM	ERR2299454	175.47	147	27262689	26790090	0	Kenieroba
SPT00835	1192-PF-ML-FAIRHURST-SM	ERR2299455	197.68	147	30947278	30329427	0	Kenieroba
SPT00837	1192-PF-ML-FAIRHURST-SM	ERR2299456	186.69	147	30039189	29555523	0	Kenieroba
SPT00839	1192-PF-ML-FAIRHURST-SM	ERR2299457	213.14	147	33876795	33446765	0	Kenieroba
SPT00841	1192-PF-ML-FAIRHURST-SM	ERR2299458	217.01	147	34514701	34047650	0	Kenieroba
SPT00843	1192-PF-ML-FAIRHURST-SM	ERR2299459	220.56	147	35068867	34513161	0	Kenieroba
SPT00844	1192-PF-ML-FAIRHURST-SM	ERR2299460	209.17	148	32651009	32139920	0	Kenieroba
SPT00845	1192-PF-ML-FAIRHURST-SM	ERR2299461	193.84	147	30762997	30225277	0	Kenieroba
SPT00846	1192-PF-ML-FAIRHURST-SM	ERR2299462	208.35	144	38222711	37214089	0	Kenieroba
SPT00847	1192-PF-ML-FAIRHURST-SM	ERR2299463	245.76	147	38908387	38196367	0	Kenieroba
SPT00848	1192-PF-ML-FAIRHURST-SM	ERR2299464	236.71	147	38036801	37390298	0	Kenieroba
SPT00849	1192-PF-ML-FAIRHURST-SM	ERR2299465	233.07	147	37674133	36995269	0	Kenieroba
SPT00850	1192-PF-ML-FAIRHURST-SM	ERR2299466	228.75	147	36615070	36162064	0	Kenieroba
SPT00851	1192-PF-ML-FAIRHURST-SM	ERR2299467	229.99	147	36803470	36273538	0	Kenieroba
SPT00857	1192-PF-ML-FAIRHURST-SM	ERR2299468	232.04	147	36234483	35579044	0	Kenieroba
SPT00858	1192-PF-ML-FAIRHURST-SM	ERR2299470	227.85	147	36406010	35599131	0	Kenieroba
SPT00859	1192-PF-ML-FAIRHURST-SM	ERR2299471	194.45	147	30426261	29688023	0	Kenieroba
SPT00860	1192-PF-ML-FAIRHURST-SM	ERR2299472	233.04	147	37162238	36646393	0	Kenieroba
SPT00861	1192-PF-ML-FAIRHURST-SM	ERR2299473	170.51	147	26683488	25669769	0	Kenieroba
SPT00862	1192-PF-ML-FAIRHURST-SM	ERR2299474	239.25	147	38691854	38211998	0	Kenieroba
SPT00864	1192-PF-ML-FAIRHURST-SM	ERR2299475	213.69	147	33189474	32734608	0	Kenieroba
SPT00866	1192-PF-ML-FAIRHURST-SM	ERR2299476	209.18	147	32509249	32001340	0	Kenieroba
SPT00867	1192-PF-ML-FAIRHURST-SM	ERR2299477	225.12	147	35887011	35260067	0	Kenieroba
SPT00868	1192-PF-ML-FAIRHURST-SM	ERR2299478	210.58	147	34140627	33735930	0	Kenieroba
SPT00869	1192-PF-ML-FAIRHURST-SM	ERR2299479	206.93	147	32128478	31502691	0	Kenieroba
SPT00871	1192-PF-ML-FAIRHURST-SM	ERR2299480	195.94	147	30643976	30120681	0	Kenieroba
SPT00872	1192-PF-ML-FAIRHURST-SM	ERR2299481	200.12	147	31159302	30673986	0	Kenieroba
SPT00873	1192-PF-ML-FAIRHURST-SM	ERR2299482	233.18	147	37245588	36649546	0	Kenieroba
SPT00874	1192-PF-ML-FAIRHURST-SM	ERR2299483	13.72	147	1734997	1682033	0	Kenieroba
SPT00875	1192-PF-ML-FAIRHURST-SM	ERR2299484	242.73	147	38350646	37697587	0	Kenieroba
SPT00876	1192-PF-ML-FAIRHURST-SM	ERR2299485	252.91	147	40521742	39808913	0	Kenieroba
SPT00877	1192-PF-ML-FAIRHURST-SM	ERR2299469	240.03	147	38718134	38023818	0	Kenieroba
SPT00879	1192-PF-ML-FAIRHURST-SM	ERR2299486	237.38	147	37709464	37062511	0	Kenieroba
SPT00880	1192-PF-ML-FAIRHURST-SM	ERR2299487	218.77	147	34392255	33732496	0	Kenieroba
SPT00881	1192-PF-ML-FAIRHURST-SM	ERR2299488	235.28	148	37104872	36594201	0	Kenieroba
SPT18420	1197-PF-ML-DIAKITE-SM	ERR2892211	115.06	143	25907053	24560968	0	nioro
SPT18421	1197-PF-ML-DIAKITE-SM	ERR2892235	108.8	144	22938057	21408048	0	nioro
SPT18422	1197-PF-ML-DIAKITE-SM	ERR2892212	90.67	141	28091976	26168812	0	nioro
SPT18423	1197-PF-ML-DIAKITE-SM	ERR2892213	145.8	144	25634955	25366370	0	nioro
SPT18424	1197-PF-ML-DIAKITE-SM	ERR2892331	66.87	146	15111192	12076418	0	nioro
SPT18425	1197-PF-ML-DIAKITE-SM	ERR2892188	92.8	143	21233759	19481633	0	nioro
SPT18426	1197-PF-ML-DIAKITE-SM	ERR2892236	86.49	145	17004582	15576671	0	nioro
SPT18427	1197-PF-ML-DIAKITE-SM	ERR2892259	101.51	145	18258820	17099198	0	nioro
SPT18429	1197-PF-ML-DIAKITE-SM	ERR2892283	94.52	143	25080183	22676008	0	nioro
SPT18430	1197-PF-ML-DIAKITE-SM	ERR2892214	112.87	143	25145207	23958549	0	nioro
SPT18431	1197-PF-ML-DIAKITE-SM	ERR2892284	113.09	137	59573609	55738209	0	nioro
SPT18432	1197-PF-ML-DIAKITE-SM	ERR2892215	124.07	144	26604059	25094602	0	nioro
SPT18433	1197-PF-ML-DIAKITE-SM	ERR2892285	64.5	146	18339236	15077247	0	nioro
SPT18435	1197-PF-ML-DIAKITE-SM	ERR2892216	140.98	143	28672676	28265454	0	nioro
SPT18436	1197-PF-ML-DIAKITE-SM	ERR2892286	70.39	143	20445511	17545833	0	nioro
SPT18437	1197-PF-ML-DIAKITE-SM	ERR2892450	87.36	142	19556573	18603860	0	nioro
SPT18438	1197-PF-ML-DIAKITE-SM	ERR2892287	105.63	144	23044841	22056758	0	nioro
SPT18439	1197-PF-ML-DIAKITE-SM	ERR2892237	117.04	142	30579010	29148090	0	nioro
SPT18440	1197-PF-ML-DIAKITE-SM	ERR2892123	47.86	146	14904350	12026661	0	nioro
SPT18441	1197-PF-ML-DIAKITE-SM	ERR2892288	88.76	142	21667833	19945365	0	nioro
SPT18442	1197-PF-ML-DIAKITE-SM	ERR2892307	101.27	143	25139251	22540121	0	nioro
SPT18443	1197-PF-ML-DIAKITE-SM	ERR2892238	117.07	142	31542584	29747521	0	nioro
SPT18444	1197-PF-ML-DIAKITE-SM	ERR2892289	126.81	142	27277749	26616676	0	nioro
SPT18445	1197-PF-ML-DIAKITE-SM	ERR2892260	102.71	144	25160653	20686354	0	nioro
SPT18446	1197-PF-ML-DIAKITE-SM	ERR2892290	66.46	144	16139065	14709725	0	nioro
SPT18447	1197-PF-ML-DIAKITE-SM	ERR2892355	101.27	144	21877065	20658033	0	nioro
SPT18448	1197-PF-ML-DIAKITE-SM	ERR2892404	134.54	142	27792661	27465826	0	nioro
SPT18449	1197-PF-ML-DIAKITE-SM	ERR2892498	99.32	142	27844542	26543189	0	nioro
SPT18450	1197-PF-ML-DIAKITE-SM	ERR2892072	117.74	145	25286723	22953210	0	nioro
SPT18451	1197-PF-ML-DIAKITE-SM	ERR2892261	108.14	143	24892096	24114406	0	nioro
SPT18452	1197-PF-ML-DIAKITE-SM	ERR2892332	123.1	144	24170691	22987950	0	nioro
SPT18453	1197-PF-ML-DIAKITE-SM	ERR2892356	117.74	143	23639078	23278830	0	nioro
SPT18454	1197-PF-ML-DIAKITE-SM	ERR2892096	120.82	143	24929613	24183645	0	nioro
SPT18455	1197-PF-ML-DIAKITE-SM	ERR2892262	112.88	143	27215259	25316569	0	nioro
SPT18456	1197-PF-ML-DIAKITE-SM	ERR2892073	130.12	142	28125806	27635282	0	nioro
SPT18457	1197-PF-ML-DIAKITE-SM	ERR2892451	132.03	143	27512337	26837710	0	nioro
SPT18458	1197-PF-ML-DIAKITE-SM	ERR2892291	113.5	143	37603383	29755114	0	nioro
SPT18459	1197-PF-ML-DIAKITE-SM	ERR2892292	104.69	143	27435630	24830484	0	nioro
SPT18461	1197-PF-ML-DIAKITE-SM	ERR2892293	92.71	142	23566055	21836926	0	nioro
SPT18462	1197-PF-ML-DIAKITE-SM	ERR2892333	146.57	143	28401947	28036242	0	nioro
SPT18465	1197-PF-ML-DIAKITE-SM	ERR2892239	141.73	143	29574230	28754851	0	nioro
SPT18466	1197-PF-ML-DIAKITE-SM	ERR2892452	111.03	143	23845108	22819497	0	nioro
SPT18468	1197-PF-ML-DIAKITE-SM	ERR2892097	144.42	142	32603792	31922261	0	nioro
SPT18469	1197-PF-ML-DIAKITE-SM	ERR2892098	120.64	143	25947149	24407260	0	nioro
SPT18470	1197-PF-ML-DIAKITE-SM	ERR2892453	115.01	142	29395373	28447790	0	nioro
SPT18471	1197-PF-ML-DIAKITE-SM	ERR2892475	109.62	142	23016643	22500592	0	nioro
SPT18472	1197-PF-ML-DIAKITE-SM	ERR2892152	63.38	145	21046035	17067030	0	nioro
SPT18473	1197-PF-ML-DIAKITE-SM	ERR2892153	94.64	145	26792894	24293753	0	nioro
SPT18474	1197-PF-ML-DIAKITE-SM	ERR2892099	157.79	144	31222135	30515898	0	nioro
SPT18475	1197-PF-ML-DIAKITE-SM	ERR2892334	140.99	143	31167740	30051583	0	Dangassa
SPT18477	1197-PF-ML-DIAKITE-SM	ERR2892476	100.21	137	34277031	34037165	0	Dangassa
SPT18480	1197-PF-ML-DIAKITE-SM	ERR2892428	118.15	140	33511930	33196191	0	Dangassa
SPT18482	1197-PF-ML-DIAKITE-SM	ERR2892429	130.6	140	31843499	31610881	0	Dangassa
SPT18483	1197-PF-ML-DIAKITE-SM	ERR2892074	101.44	138	38720649	37988132	0	Dangassa
SPT18487	1197-PF-ML-DIAKITE-SM	ERR2892335	94.48	140	27400140	26680760	0	Dangassa
SPT18490	1197-PF-ML-DIAKITE-SM	ERR2892077	143.8	141	35614383	35465437	0	Dangassa
SPT18493	1197-PF-ML-DIAKITE-SM	ERR2892311	114.95	138	38603976	38424881	0	Dangassa
SPT18496	1197-PF-ML-DIAKITE-SM	ERR2892240	115.52	139	37332344	36913896	0	Dangassa
SPT18497	1197-PF-ML-DIAKITE-SM	ERR2892241	113.99	139	33712706	33324761	0	Dangassa
SPT18500	1197-PF-ML-DIAKITE-SM	ERR2892360	92.84	139	31344714	30308379	0	Dangassa
SPT18507	1197-PF-ML-DIAKITE-SM	ERR2892217	98.54	139	37162516	36961719	0	Dangassa
SPT18509	1197-PF-ML-DIAKITE-SM	ERR2892078	121.78	140	35629390	35083136	0	Dangassa
SPT18510	1197-PF-ML-DIAKITE-SM	ERR2892337	112.87	139	36783599	36179510	0	Dangassa
SPT18512	1197-PF-ML-DIAKITE-SM	ERR2892080	102.01	140	39839628	38260371	0	Dangassa
SPT18513	1197-PF-ML-DIAKITE-SM	ERR2892294	95.64	139	31178417	30639809	0	Dangassa
SPT18514	1197-PF-ML-DIAKITE-SM	ERR2892246	125.61	139	37273180	35951398	0	Dangassa
SPT18517	1197-PF-ML-DIAKITE-SM	ERR2892389	109.99	139	36666593	35475469	0	Dangassa
SPT18518	1197-PF-ML-DIAKITE-SM	ERR2892227	109.17	137	39070852	38701887	0	Dangassa
SPT18520	1197-PF-ML-DIAKITE-SM	ERR2892391	105.22	139	34204575	33488100	0	Dangassa
SPT18521	1197-PF-ML-DIAKITE-SM	ERR2892414	127.34	141	33615769	32944670	0	Dangassa
SPT18522	1197-PF-ML-DIAKITE-SM	ERR2892222	123.15	141	30393310	28731604	0	Dangassa
SPT18523	1197-PF-ML-DIAKITE-SM	ERR2892412	103.67	140	37635927	35389724	0	Dangassa
SPT18526	1197-PF-ML-DIAKITE-SM	ERR2892168	108.82	139	40000223	38299218	0	Dangassa
SPT18528	1197-PF-ML-DIAKITE-SM	ERR2892413	128.84	140	33088791	32514176	0	Dangassa
SPT18530	1197-PF-ML-DIAKITE-SM	ERR2892508	92.92	141	31123754	30753519	0	Dangassa
SPT18533	1197-PF-ML-DIAKITE-SM	ERR2892383	112.32	141	28101193	27339049	0	Dangassa
SPT18534	1197-PF-ML-DIAKITE-SM	ERR2892167	94.45	145	23142520	19002087	0	Dangassa
SPT18535	1197-PF-ML-DIAKITE-SM	ERR2892193	103.46	140	36148781	34718707	0	Dangassa
SPT18536	1197-PF-ML-DIAKITE-SM	ERR2892510	77.56	140	26660781	26426029	0	Dangassa
SPT18539	1197-PF-ML-DIAKITE-SM	ERR2892410	123.58	142	28545895	28038380	0	Dangassa
SPT18540	1197-PF-ML-DIAKITE-SM	ERR2892192	133.1	144	25385712	25032882	0	Dangassa
SPT18541	1197-PF-ML-DIAKITE-SM	ERR2892166	132.05	142	28798217	28473336	0	Dangassa
SPT18542	1197-PF-ML-DIAKITE-SM	ERR2892382	151.47	143	30535723	30128293	0	Dangassa
SPT18543	1197-PF-ML-DIAKITE-SM	ERR2892502	110.14	140	31643709	30885910	0	Dangassa
SPT18544	1197-PF-ML-DIAKITE-SM	ERR2892379	143.07	143	27564976	27248604	0	Dangassa
SPT18545	1197-PF-ML-DIAKITE-SM	ERR2892218	116.4	143	27473192	25715020	0	Dangassa
SPT18546	1197-PF-ML-DIAKITE-SM	ERR2892191	81.6	142	27309900	24497777	0	Dangassa
SPT18547	1197-PF-ML-DIAKITE-SM	ERR2892313	126.02	143	25475239	25014477	0	Dangassa
SPT18548	1197-PF-ML-DIAKITE-SM	ERR2892381	118.44	145	25099255	22684257	0	Dangassa
SPT18549	1197-PF-ML-DIAKITE-SM	ERR2892501	100.15	141	28435512	27231979	0	Dangassa
SPT18550	1197-PF-ML-DIAKITE-SM	ERR2892499	72.36	144	26101494	23443453	0	Dangassa
SPT18551	1197-PF-ML-DIAKITE-SM	ERR2892500	118.98	142	30673344	29256401	0	Dangassa
SPT18552	1197-PF-ML-DIAKITE-SM	ERR2892380	140.29	143	29973889	28884209	0	Dangassa
SPT18553	1197-PF-ML-DIAKITE-SM	ERR2892405	100.3	144	22091134	20086997	0	Dangassa
SPT18554	1197-PF-ML-DIAKITE-SM	ERR2892190	116.76	145	22587129	21541573	0	Dangassa
SPT18555	1197-PF-ML-DIAKITE-SM	ERR2892198	125.57	140	35388984	34113285	0	Dangassa
SPT18556	1197-PF-ML-DIAKITE-SM	ERR2892390	123.15	140	32455458	31277852	0	Dangassa
SPT18558	1197-PF-ML-DIAKITE-SM	ERR2892270	90.35	138	30913822	27962727	0	Dangassa
SPT18559	1197-PF-ML-DIAKITE-SM	ERR2892197	165	143	33142974	32912201	0	Dangassa
SPT18561	1197-PF-ML-DIAKITE-SM	ERR2892388	113.16	140	30465951	29639377	0	Dangassa
SPT18565	1197-PF-ML-DIAKITE-SM	ERR2893179	146.79	143	30744300	29638861	0	Dangassa
SPT18566	1197-PF-ML-DIAKITE-SM	ERR2892339	154.51	144	28377939	28080206	0	Dangassa
SPT18567	1197-PF-ML-DIAKITE-SM	ERR2892415	114.33	140	27850727	26565469	0	Dangassa
SPT18568	1197-PF-ML-DIAKITE-SM	ERR2892230	99.02	141	32684861	31135403	0	Dangassa
SPT18570	1197-PF-ML-DIAKITE-SM	ERR2892229	133.05	141	32003521	30788829	0	Dangassa
SPT18572	1197-PF-ML-DIAKITE-SM	ERR2892196	138.75	141	30604179	30110729	0	Dangassa
SPT18573	1197-PF-ML-DIAKITE-SM	ERR2892268	65.78	141	17249070	14911854	0	Dangassa
SPT18574	1197-PF-ML-DIAKITE-SM	ERR2892175	107.12	139	36593060	35725760	0	Dangassa
SPT18575	1197-PF-ML-DIAKITE-SM	ERR2892416	125.48	141	29080991	28388463	0	Dangassa
SPT18576	1197-PF-ML-DIAKITE-SM	ERR2892244	112.96	141	33637917	29419815	0	Dangassa
SPT18577	1197-PF-ML-DIAKITE-SM	ERR2892173	114.64	142	28629676	27291384	0	Dangassa
SPT18578	1197-PF-ML-DIAKITE-SM	ERR2892174	97.46	138	38271363	35501369	0	Dangassa
SPT18579	1197-PF-ML-DIAKITE-SM	ERR2892228	158.22	141	71120264	65973423	0	Dangassa
SPT18580	1197-PF-ML-DIAKITE-SM	ERR2892221	144.62	142	31482329	30732686	0	Dangassa
SPT18581	1197-PF-ML-DIAKITE-SM	ERR2892411	123.24	143	26893150	25939387	0	Dangassa
SPT18582	1197-PF-ML-DIAKITE-SM	ERR2892266	83.39	137	25317420	24134524	0	Dangassa
SPT18583	1197-PF-ML-DIAKITE-SM	ERR2892220	135.52	142	32558031	30380736	0	Dangassa
SPT18584	1197-PF-ML-DIAKITE-SM	ERR2892387	146.11	143	30032881	29756798	0	Dangassa
SPT18585	1197-PF-ML-DIAKITE-SM	ERR2892172	138.8	140	33084311	32801580	0	Dangassa
SPT18586	1197-PF-ML-DIAKITE-SM	ERR2892194	149.18	142	35748728	34418402	0	Dangassa
SPT18588	1197-PF-ML-DIAKITE-SM	ERR2892171	129.05	141	35203188	33425595	0	Dangassa
SPT18589	1197-PF-ML-DIAKITE-SM	ERR2892226	150.24	143	29014393	28730258	0	Dangassa
SPT18590	1197-PF-ML-DIAKITE-SM	ERR2892386	129.72	143	28088625	27307883	0	Dangassa
SPT18591	1197-PF-ML-DIAKITE-SM	ERR2892338	93.59	143	25147551	21405790	0	Dangassa
SPT18592	1197-PF-ML-DIAKITE-SM	ERR2892384	99.04	144	27876767	24591502	0	Dangassa
SPT18593	1197-PF-ML-DIAKITE-SM	ERR2892505	117.2	142	28342629	27510520	0	Dangassa
SPT18594	1197-PF-ML-DIAKITE-SM	ERR2892406	141.64	143	28114765	27306352	0	Dangassa
SPT18595	1197-PF-ML-DIAKITE-SM	ERR2892295	85.76	146	24308395	19843607	0	Dangassa
SPT18596	1197-PF-ML-DIAKITE-SM	ERR2892506	125.33	142	33600446	32523618	0	Dangassa
SPT18597	1197-PF-ML-DIAKITE-SM	ERR2892165	127.94	142	27830514	26965422	0	Dangassa
SPT18598	1197-PF-ML-DIAKITE-SM	ERR2892504	115.89	142	24854611	24028564	0	Dangassa
SPT18599	1197-PF-ML-DIAKITE-SM	ERR2892503	146.51	143	29727696	28794372	0	Dangassa
SPT18600	1197-PF-ML-DIAKITE-SM	ERR2892408	127.2	142	28331767	27701841	0	Dangassa
SPT18601	1197-PF-ML-DIAKITE-SM	ERR2892407	126.9	143	26105865	25298129	0	Dangassa
SPT18602	1197-PF-ML-DIAKITE-SM	ERR2892169	136.84	142	33483087	31984934	0	Dangassa
SPT18603	1197-PF-ML-DIAKITE-SM	ERR2892225	71.85	141	19812304	18739051	0	Dangassa
SPT18604	1197-PF-ML-DIAKITE-SM	ERR2892223	136.68	143	28348820	27016431	0	Dangassa
SPT18606	1197-PF-ML-DIAKITE-SM	ERR2892243	154.09	142	32121760	31734229	0	Dangassa
SPT18607	1197-PF-ML-DIAKITE-SM	ERR2892170	151.5	140	36639363	36401513	0	Dangassa
SPT18608	1197-PF-ML-DIAKITE-SM	ERR2892200	133.15	137	41246836	40240766	0	Dangassa
SPT18609	1197-PF-ML-DIAKITE-SM	ERR2892273	113.68	136	37783354	35939776	0	Dangassa
SPT18611	1197-PF-ML-DIAKITE-SM	ERR2892363	87.74	141	25005287	21348876	0	Dangassa
SPT18612	1197-PF-ML-DIAKITE-SM	ERR2892439	94.15	132	40089613	36768910	0	Dangassa
SPT18613	1197-PF-ML-DIAKITE-SM	ERR2892085	104.85	135	42816540	40729880	0	Dangassa
SPT18614	1197-PF-ML-DIAKITE-SM	ERR2892466	116.1	139	33008954	30710022	0	Dangassa
SPT18615	1197-PF-ML-DIAKITE-SM	ERR2892129	85.71	141	34803954	26934916	0	Dangassa
SPT18616	1197-PF-ML-DIAKITE-SM	ERR2892087	118.1	140	35138524	32848534	0	Dangassa
SPT18617	1197-PF-ML-DIAKITE-SM	ERR2892315	95.65	145	22685675	19134694	0	Dangassa
SPT18618	1197-PF-ML-DIAKITE-SM	ERR2892492	86.14	139	31593333	25329479	0	Dangassa
SPT18619	1197-PF-ML-DIAKITE-SM	ERR2892392	126.08	142	31818543	27465611	0	Dangassa
SPT18620	1197-PF-ML-DIAKITE-SM	ERR2892467	168.68	142	37711979	37036306	0	Dangassa
SPT18621	1197-PF-ML-DIAKITE-SM	ERR2892361	133.25	143	27349991	26163484	0	Dangassa
SPT18622	1197-PF-ML-DIAKITE-SM	ERR2892199	118.45	134	37558589	35779483	0	Dangassa
SPT18623	1197-PF-ML-DIAKITE-SM	ERR2892433	111.45	137	37540739	35648883	0	Dangassa
SPT18624	1197-PF-ML-DIAKITE-SM	ERR2892484	106.5	140	32293913	29397216	0	Dangassa
SPT18625	1197-PF-ML-DIAKITE-SM	ERR2892482	111.9	140	26601514	25802846	0	Dangassa
SPT18626	1197-PF-ML-DIAKITE-SM	ERR2892462	133.53	141	30678648	30230268	0	Dangassa
SPT18627	1197-PF-ML-DIAKITE-SM	ERR2892430	125.02	142	28656515	27602471	0	Dangassa
SPT18628	1197-PF-ML-DIAKITE-SM	ERR2892104	134.02	142	31625276	29574621	0	Dangassa
SPT18629	1197-PF-ML-DIAKITE-SM	ERR2892231	102.2	141	28582399	26591244	0	Dangassa
SPT18630	1197-PF-ML-DIAKITE-SM	ERR2892345	124.74	141	36178763	30655932	0	Dangassa
SPT18631	1197-PF-ML-DIAKITE-SM	ERR2892089	148.8	141	32748632	31627796	0	Dangassa
SPT18632	1197-PF-ML-DIAKITE-SM	ERR2892088	115.05	134	39870477	37756555	0	Dangassa
SPT18633	1197-PF-ML-DIAKITE-SM	ERR2892372	158.91	135	97328721	89211544	0	Dangassa
SPT18636	1197-PF-ML-DIAKITE-SM	ERR2892490	117.67	141	33960369	31035448	0	Dangassa
SPT18637	1197-PF-ML-DIAKITE-SM	ERR2892440	99.85	137	30054642	29051988	0	Dangassa
SPT18638	1197-PF-ML-DIAKITE-SM	ERR2892298	91.11	137	29502397	26670175	0	Dangassa
SPT18639	1197-PF-ML-DIAKITE-SM	ERR2892082	137.78	141	32930467	31333001	0	Dangassa
SPT18640	1197-PF-ML-DIAKITE-SM	ERR2892341	144.59	141	33923014	32221349	0	Dangassa
SPT18641	1197-PF-ML-DIAKITE-SM	ERR2892437	105.56	134	40526310	38183457	0	Dangassa
SPT18642	1197-PF-ML-DIAKITE-SM	ERR2892314	143.49	139	35477494	33370164	0	Dangassa
SPT18643	1197-PF-ML-DIAKITE-SM	ERR2892086	132.04	140	32151865	30241527	0	Dangassa
SPT18644	1197-PF-ML-DIAKITE-SM	ERR2892272	103.56	136	34051714	32035736	0	Dangassa
SPT18645	1197-PF-ML-DIAKITE-SM	ERR2892344	150.86	140	36461605	35698184	0	Dangassa
SPT18646	1197-PF-ML-DIAKITE-SM	ERR2892431	89.62	139	30381857	27076124	0	Dangassa
SPT18648	1197-PF-ML-DIAKITE-SM	ERR2892486	113.77	138	33282180	31441174	0	Dangassa
SPT18649	1197-PF-ML-DIAKITE-SM	ERR2892491	227.54	140	71174843	69681089	0	Dangassa
SPT18650	1197-PF-ML-DIAKITE-SM	ERR2892465	143.45	141	33764698	32810449	0	Dangassa
SPT18651	1197-PF-ML-DIAKITE-SM	ERR2892248	117.51	139	30258032	28581216	0	Dangassa
SPT18652	1197-PF-ML-DIAKITE-SM	ERR2892083	133.46	143	29615812	28040573	0	Dangassa
SPT18653	1197-PF-ML-DIAKITE-SM	ERR2892417	89.55	139	35741207	30469571	0	Dangassa
SPT18654	1197-PF-ML-DIAKITE-SM	ERR2892340	96.87	142	23337975	21641274	0	Dangassa
SPT18655	1197-PF-ML-DIAKITE-SM	ERR2892489	91.99	137	32297432	29414930	0	Dangassa
SPT18656	1197-PF-ML-DIAKITE-SM	ERR2892271	129.88	140	30758147	28996348	0	Dangassa
SPT18657	1197-PF-ML-DIAKITE-SM	ERR2892488	128.71	140	32689637	31398237	0	Dangassa
SPT18658	1197-PF-ML-DIAKITE-SM	ERR2892485	139	137	37567542	37004274	0	Dangassa
SPT18659	1197-PF-ML-DIAKITE-SM	ERR2892317	105.26	141	23601786	22176271	0	Dangassa
SPT18660	1197-PF-ML-DIAKITE-SM	ERR2892126	76.27	146	27388554	23903309	0	Dangassa
SPT18661	1197-PF-ML-DIAKITE-SM	ERR2892371	111.07	143	26399237	23416737	0	Dangassa
SPT18662	1197-PF-ML-DIAKITE-SM	ERR2892464	110.04	142	26092337	24519011	0	Dangassa
SPT18663	1197-PF-ML-DIAKITE-SM	ERR2892480	86.36	140	32927234	26619163	0	Dangassa
SPT18664	1197-PF-ML-DIAKITE-SM	ERR2892460	117.65	141	26617909	25274083	0	Dangassa
SPT18665	1197-PF-ML-DIAKITE-SM	ERR2892103	135.74	140	34653905	33506117	0	Dangassa
SPT18666	1197-PF-ML-DIAKITE-SM	ERR2892177	142.01	143	32590571	28603417	0	Dangassa
SPT18667	1197-PF-ML-DIAKITE-SM	ERR2892459	112.34	139	31379550	29567063	0	Dangassa
SPT18668	1197-PF-ML-DIAKITE-SM	ERR2892455	134.74	143	27539194	26053171	0	Dangassa
SPT18669	1197-PF-ML-DIAKITE-SM	ERR2892299	105.32	139	35663559	32281739	0	Dangassa
SPT18670	1197-PF-ML-DIAKITE-SM	ERR2892463	117.04	143	27433936	25081517	0	Dangassa
SPT18671	1197-PF-ML-DIAKITE-SM	ERR2892434	120.6	137	39578854	38256044	0	Dangassa
SPT18672	1197-PF-ML-DIAKITE-SM	ERR2892481	125.69	140	31586786	30581361	0	Dangassa
SPT18673	1197-PF-ML-DIAKITE-SM	ERR2892487	133.35	141	28543423	27737283	0	Dangassa
SPT18674	1197-PF-ML-DIAKITE-SM	ERR2892081	154.39	142	32280699	31455383	0	Dangassa
SPT18675	1197-PF-ML-DIAKITE-SM	ERR2892368	100.25	140	28231702	25781687	0	Dangassa
SPT18676	1197-PF-ML-DIAKITE-SM	ERR2892483	121.11	138	42107943	38807942	0	Dangassa
SPT18677	1197-PF-ML-DIAKITE-SM	ERR2892365	122.37	140	31514440	29903359	0	Dangassa
SPT18678	1197-PF-ML-DIAKITE-SM	ERR2892366	124.39	144	24812217	23839251	0	Dangassa
SPT18680	1197-PF-ML-DIAKITE-SM	ERR2892436	108.74	142	25853664	24316230	0	Dangassa
SPT18682	1197-PF-ML-DIAKITE-SM	ERR2892101	109.9	142	31063935	25588415	0	Dangassa
SPT18683	1197-PF-ML-DIAKITE-SM	ERR2892369	130.88	142	29279951	28422173	0	Dangassa
SPT18684	1197-PF-ML-DIAKITE-SM	ERR2892367	115.03	138	33214753	31646236	0	Dangassa
SPT18685	1197-PF-ML-DIAKITE-SM	ERR2892370	120.58	139	29876415	29098548	0	Dangassa
SPT18686	1197-PF-ML-DIAKITE-SM	ERR2892432	101.49	143	27148588	22186580	0	Dangassa
SPT18687	1197-PF-ML-DIAKITE-SM	ERR2892316	110.76	142	29475996	27507614	0	Dangassa
SPT18688	1197-PF-ML-DIAKITE-SM	ERR2892479	121.23	140	27508610	26534774	0	Dangassa
SPT18926	1197-PF-ML-DIAKITE-SM	ERR2892342	113.64	135	41077098	39828846	0	Dangassa
SPT18927	1197-PF-ML-DIAKITE-SM	ERR2892442	105.81	137	33956649	32268918	0	nioro
SPT18928	1197-PF-ML-DIAKITE-SM	ERR2892458	94.42	136	36341012	35904397	0	nioro
SPT18929	1197-PF-ML-DIAKITE-SM	ERR2892362	125.03	139	31987788	31160321	0	nioro
SPT18932	1197-PF-ML-DIAKITE-SM	ERR2892461	103.32	136	36622930	36235541	0	nioro
SPT18937	1197-PF-ML-DIAKITE-SM	ERR2892084	103.39	134	37214544	36116675	0	nioro
SPT18940	1197-PF-ML-DIAKITE-SM	ERR2892182	60.97	126	48056137	47409800	0	nioro
SPT18942	1197-PF-ML-DIAKITE-SM	ERR2892181	109.78	141	31808997	29884653	0	nioro
SPT18943	1197-PF-ML-DIAKITE-SM	ERR2892493	76.63	138	26253546	25339741	0	nioro
SPT18944	1197-PF-ML-DIAKITE-SM	ERR2892321	93.1	137	29559232	28864544	0	nioro
SPT18947	1197-PF-ML-DIAKITE-SM	ERR2892205	106.87	138	34408015	33319205	0	nioro
SPT18949	1197-PF-ML-DIAKITE-SM	ERR2892251	100.46	136	33300554	31909476	0	nioro
SPT18952	1197-PF-ML-DIAKITE-SM	ERR2892398	107.55	138	38797328	37803963	0	nioro
SPT18955	1197-PF-ML-DIAKITE-SM	ERR2892322	106.32	139	30075797	29766710	0	nioro
SPT18956	1197-PF-ML-DIAKITE-SM	ERR2892277	103.46	140	27427368	26811016	0	nioro
SPT18957	1197-PF-ML-DIAKITE-SM	ERR2892373	93.9	137	35892699	34960857	0	nioro
SPT18958	1197-PF-ML-DIAKITE-SM	ERR2892421	114.66	140	31377274	30596771	0	nioro
SPT18959	1197-PF-ML-DIAKITE-SM	ERR2892276	108.46	137	36257068	35415409	0	nioro
SPT18960	1197-PF-ML-DIAKITE-SM	ERR2892320	106.93	139	31373335	30391092	0	nioro
SPT18962	1197-PF-ML-DIAKITE-SM	ERR2892232	29.63	146	23502004	9183175	0	nioro
SPT18963	1197-PF-ML-DIAKITE-SM	ERR2892395	96.07	139	36967754	36030426	0	nioro
SPT18964	1197-PF-ML-DIAKITE-SM	ERR2892204	111.8	136	39726641	38885941	0	nioro
SPT18968	1197-PF-ML-DIAKITE-SM	ERR2892303	114.72	137	33241055	33035553	0	nioro
SPT18969	1197-PF-ML-DIAKITE-SM	ERR2892302	120.26	140	27588600	27344122	0	nioro
SPT18970	1197-PF-ML-DIAKITE-SM	ERR2892203	124.55	138	39322896	38675118	0	nioro
SPT18971	1197-PF-ML-DIAKITE-SM	ERR2892319	78.9	142	24730265	21734072	0	nioro
SPT18973	1197-PF-ML-DIAKITE-SM	ERR2892183	100.25	137	35174851	34487629	0	nioro
SPT18975	1197-PF-ML-DIAKITE-SM	ERR2892323	98.87	138	33051657	31540896	0	nioro
SPT18976	1197-PF-ML-DIAKITE-SM	ERR2892278	101.8	135	39998515	39054494	0	nioro
SPT18978	1197-PF-ML-DIAKITE-SM	ERR2892423	104.28	135	34090623	33685736	0	nioro
SPT18980	1197-PF-ML-DIAKITE-SM	ERR2892206	139.17	139	35735627	35348741	0	nioro
SPT18981	1197-PF-ML-DIAKITE-SM	ERR2892185	102.8	138	33145555	32154429	0	nioro
SPT18983	1197-PF-ML-DIAKITE-SM	ERR2892233	124.32	137	38787758	38188021	0	nioro
SPT18984	1197-PF-ML-DIAKITE-SM	ERR2892520	109.85	137	33142986	32403713	0	nioro
SPT18985	1197-PF-ML-DIAKITE-SM	ERR2892186	120.62	140	38959515	37220945	0	nioro
SPT18986	1197-PF-ML-DIAKITE-SM	ERR2892253	113.05	137	42446441	41343282	0	nioro
SPT18987	1197-PF-ML-DIAKITE-SM	ERR2892446	88.39	135	29599691	28940611	0	nioro
SPT18988	1197-PF-ML-DIAKITE-SM	ERR2892399	23.6	131	19142478	16567292	0	nioro
SPT18989	1197-PF-ML-DIAKITE-SM	ERR2892348	121.17	138	38185348	37225782	0	nioro
SPT18991	1197-PF-ML-DIAKITE-SM	ERR2892469	98.59	139	32654475	31020096	0	nioro
SPT18993	1197-PF-ML-DIAKITE-SM	ERR2892254	116.5	137	34633373	34006064	0	nioro
SPT18994	1197-PF-ML-DIAKITE-SM	ERR2892234	93.03	139	28753050	27622056	0	nioro
SPT18995	1197-PF-ML-DIAKITE-SM	ERR2892279	98.49	138	31980479	30592847	0	nioro
SPT18998	1197-PF-ML-DIAKITE-SM	ERR2892400	116.89	137	42434777	41538329	0	nioro
SPT19000	1197-PF-ML-DIAKITE-SM	ERR2892349	120.88	140	31500655	31099518	0	nioro
SPT19003	1197-PF-ML-DIAKITE-SM	ERR2892324	104.67	130	46468699	46098539	0	nioro
SPT19005	1197-PF-ML-DIAKITE-SM	ERR2892325	122.2	137	42160140	41670551	0	nioro
SPT19011	1197-PF-ML-DIAKITE-SM	ERR2892513	80.18	144	36012558	29749473	0	nioro
SPT19012	1197-PF-ML-DIAKITE-SM	ERR2892346	91.86	140	30405962	28187626	0	nioro
SPT19017	1197-PF-ML-DIAKITE-SM	ERR2892419	203.39	141	71144653	69374990	0	nioro
SPT19018	1197-PF-ML-DIAKITE-SM	ERR2892420	121.48	141	28926676	28274137	0	nioro
SPT19019	1197-PF-ML-DIAKITE-SM	ERR2892274	100.36	138	32660712	31442123	0	nioro
SPT19021	1197-PF-ML-DIAKITE-SM	ERR2892300	54.95	130	59929039	56782005	0	nioro
SPT19023	1197-PF-ML-DIAKITE-SM	ERR2892318	95.74	140	35524631	31757820	0	nioro
SPT19024	1197-PF-ML-DIAKITE-SM	ERR2892418	96.52	140	36742618	35952251	0	nioro
SPT19025	1197-PF-ML-DIAKITE-SM	ERR2892393	118.04	140	35275416	33879790	0	nioro
SPT19026	1197-PF-ML-DIAKITE-SM	ERR2892301	111.46	141	25292191	24948680	0	nioro
SPT19028	1197-PF-ML-DIAKITE-SM	ERR2892516	101.88	138	36736064	36014598	0	nioro
SPT19029	1197-PF-ML-DIAKITE-SM	ERR2892201	106.94	140	38273122	36953126	0	nioro
SPT19031	1197-PF-ML-DIAKITE-SM	ERR2892249	90.17	140	27287922	26474108	0	nioro
SPT19032	1197-PF-ML-DIAKITE-SM	ERR2892514	116.46	140	28558627	28105134	0	nioro
SPT19236	1164-PF-ML-DJIMDE-SM	ERR2894376	59.89	145	13670118	11643717	0	Bougoula-Hameau
SPT19238	1164-PF-ML-DJIMDE-SM	ERR2894382	93.06	143	22358943	20405830	0	Bougoula-Hameau
SPT19241	1164-PF-ML-DJIMDE-SM	ERR2894390	81.84	145	24903236	18593688	0	Bougoula-Hameau
SPT19242	1164-PF-ML-DJIMDE-SM	ERR2894393	101.65	146	28878400	20172615	0	Bougoula-Hameau
SPT19243	1164-PF-ML-DJIMDE-SM	ERR2894396	114.61	144	24629360	23409674	0	Bougoula-Hameau
SPT19246	1164-PF-ML-DJIMDE-SM	ERR2894383	136.81	141	32794681	31011662	0	Bougoula-Hameau
SPT19253	1164-PF-ML-DJIMDE-SM	ERR2894378	41.02	146	11863156	9461955	0	Bougoula-Hameau
SPT19256	1164-PF-ML-DJIMDE-SM	ERR2894386	49.59	144	12908647	10697105	0	Bougoula-Hameau
SPT19258	1164-PF-ML-DJIMDE-SM	ERR2894392	63.17	144	16177731	13721793	0	Bougoula-Hameau
SPT19262	1164-PF-ML-DJIMDE-SM	ERR2894402	82.44	142	22626479	20219056	0	Bougoula-Hameau
SPT19265	1164-PF-ML-DJIMDE-SM	ERR2894410	99.55	142	24466654	22376289	0	Bougoula-Hameau
SPT19267	1164-PF-ML-DJIMDE-SM	ERR2894413	43.8	146	15145727	10215219	0	Bougoula-Hameau
SPT19270	1164-PF-ML-DJIMDE-SM	ERR2894400	54.61	144	14734459	12505561	0	Bougoula-Hameau
SPT19272	1164-PF-ML-DJIMDE-SM	ERR2894405	92.07	143	23021645	20867491	0	Bougoula-Hameau
SPT19275	1164-PF-ML-DJIMDE-SM	ERR2894414	108.72	141	28308769	25715385	0	Bougoula-Hameau
SPT19277	1164-PF-ML-DJIMDE-SM	ERR2894419	20.38	143	8194867	5401088	0	Bougoula-Hameau
SPT19286	1164-PF-ML-DJIMDE-SM	ERR2894421	35.46	146	10838596	7909421	0	Bougoula-Hameau
SPT19289	1164-PF-ML-DJIMDE-SM	ERR2894429	65.2	140	22561442	19963409	0	Bougoula-Hameau
SPT19291	1164-PF-ML-DJIMDE-SM	ERR2894433	36.31	144	10530506	7610295	0	Bougoula-Hameau
SPT19293	1164-PF-ML-DJIMDE-SM	ERR2894438	104.98	137	34317834	32440056	0	Faladje
SPT19294	1164-PF-ML-DJIMDE-SM	ERR2894422	88.55	141	21261736	19961333	0	Faladje
SPT19297	1164-PF-ML-DJIMDE-SM	ERR2894430	84.01	143	22549897	19232219	0	Faladje
SPT19300	1164-PF-ML-DJIMDE-SM	ERR2894436	85.82	141	22913991	20979266	0	Faladje
SPT19306	1164-PF-ML-DJIMDE-SM	ERR2894432	101.83	141	22748930	21829351	0	Faladje
SPT19311	1164-PF-ML-DJIMDE-SM	ERR2894444	84.28	141	22269143	19188141	0	Faladje
SPT19316	1164-PF-ML-DJIMDE-SM	ERR2894456	97.64	141	29095322	25451987	0	Faladje
SPT19319	1164-PF-ML-DJIMDE-SM	ERR2894445	90.4	141	20610195	19580167	0	Faladje
SPT19321	1164-PF-ML-DJIMDE-SM	ERR2894450	95.37	140	26451828	24033634	0	Faladje
SPT19323	1164-PF-ML-DJIMDE-SM	ERR2894454	86.47	142	28092912	25661264	0	Faladje
SPT19329	1164-PF-ML-DJIMDE-SM	ERR2894451	110.3	141	25631943	24565612	0	Faladje
SPT19332	1164-PF-ML-DJIMDE-SM	ERR2894458	100.31	143	19837569	19119058	0	Faladje
SPT19336	1164-PF-ML-DJIMDE-SM	ERR2894316	85.34	142	24277969	20215273	0	Faladje
SPT19341	1164-PF-ML-DJIMDE-SM	ERR2894331	69.55	143	18712110	16982126	0	Faladje
SPT19347	1164-PF-ML-DJIMDE-SM	ERR2894326	90.45	142	20301670	18786912	0	Faladje
SPT19349	1164-PF-ML-DJIMDE-SM	ERR2894332	78.25	141	24314878	20824017	0	Faladje
SPT19353	1164-PF-ML-DJIMDE-SM	ERR2894321	74.36	141	16194471	15471498	0	Faladje
SPT19356	1164-PF-ML-DJIMDE-SM	ERR2894330	67.28	141	20363480	17529488	0	Faladje
SPT19360	1164-PF-ML-DJIMDE-SM	ERR2894340	67.31	142	13830785	13124903	0	Faladje
SPT19361	1164-PF-ML-DJIMDE-SM	ERR2894343	102.74	141	21154485	20816730	0	Faladje
SPT19364	1164-PF-ML-DJIMDE-SM	ERR2894352	67.29	141	17678806	15909852	0	Faladje
SPT19368	1164-PF-ML-DJIMDE-SM	ERR2894341	51.41	141	11641068	10801736	0	Faladje
SPT19372	1164-PF-ML-DJIMDE-SM	ERR2894353	48.66	142	12886704	11145922	0	Faladje
SPT19374	1164-PF-ML-DJIMDE-SM	ERR2894336	79.73	141	17697574	16545576	0	Faladje
SPT19376	1164-PF-ML-DJIMDE-SM	ERR2894342	90.41	143	19802015	18321566	0	Faladje
SPT19377	1164-PF-ML-DJIMDE-SM	ERR2894345	77.25	141	18043092	17107238	0	Faladje
SPT19383	1164-PF-ML-DJIMDE-SM	ERR2894264	80.83	140	22694047	21513333	0	Faladje
SPT19385	1164-PF-ML-DJIMDE-SM	ERR2894270	59.22	145	21169568	18346389	0	Faladje
SPT19388	1164-PF-ML-DJIMDE-SM	ERR2894279	79.25	137	23773967	22881650	0	Faladje
SPT19390	1164-PF-ML-DJIMDE-SM	ERR2894262	57.74	144	18082346	15644929	0	Faladje
SPT19391	1164-PF-ML-DJIMDE-SM	ERR2894265	68.09	146	33767155	31677446	0	Faladje
SPT19395	1164-PF-ML-DJIMDE-SM	ERR2894277	57.65	143	18374951	15763310	0	Faladje
SPT19397	1164-PF-ML-DJIMDE-SM	ERR2894283	88.19	140	29346735	25349033	0	Faladje
SPT19399	1164-PF-ML-DJIMDE-SM	ERR2894266	91.38	141	28925567	24672734	0	Faladje
SPT19400	1164-PF-ML-DJIMDE-SM	ERR2894269	85.4	142	30737823	26469150	0	Faladje
SPT19405	1164-PF-ML-DJIMDE-SM	ERR2894284	65.61	140	20064052	17795590	0	Faladje
SPT19407	1164-PF-ML-DJIMDE-SM	ERR2894288	135.45	141	33307707	31436949	0	Faladje
SPT19410	1164-PF-ML-DJIMDE-SM	ERR2894297	64.63	141	23322989	20374311	0	Faladje
SPT19415	1164-PF-ML-DJIMDE-SM	ERR2894289	72.31	142	21609518	18227617	0	Faladje
SPT19416	1164-PF-ML-DJIMDE-SM	ERR2894292	106.78	141	26006714	25100485	0	Faladje
SPT19421	1164-PF-ML-DJIMDE-SM	ERR2894307	88.58	140	26262078	23617353	0	Faladje
SPT19423	1164-PF-ML-DJIMDE-SM	ERR2894290	101.29	140	25703227	24698277	0	Faladje
SPT19433	1164-PF-ML-DJIMDE-SM	ERR2894366	79.13	141	26986381	24470005	0	Faladje
SPT19435	1164-PF-ML-DJIMDE-SM	ERR2894370	47.37	142	18873614	14735556	0	Faladje
SPT19447	1164-PF-ML-DJIMDE-SM	ERR2894362	14.02	143	12221828	6389550	0	Faladje

## Sheet: Table_S3.Overall Fst & Jost's D
Table S3. Indices of differentiation between geo-temporal populations of P. falciparum from Mali. Values are shaded yellow to red to depict low to high respectively
Table S3.1	Fst
	Kolle	Faladje	Bamako	Bougoula-Hameau	Kéniéroba	Nioro	Dangassa
Kolle	0
Faladje	0.00200283	0
Bamako	0.00217356	0.00172497	0
Bougoula-Hameau	0.00216726	0.00218507	0.00236446	0
Kéniéroba	0.00221873	0.00218808	0.00245771	0.00221138	0
Nioro	0.00225156	0.00230755	0.00256955	0.00215182	0.00210895	0
Dangassa	0.0022901	0.00233073	0.00260911	0.00218493	0.00207444	0.00185627	0
Table S3.2	Jost's D
	Kolle	Faladje	Bamako	Bougoula-Hameau	Kéniéroba	Nioro	Dangassa
Kolle	0
Faladje	0.00111017	0
Bamako	0.00153319	0.000773716	0
Bougoula-Hameau	0.00242956	0.00174874	0.00231963	0
Kéniéroba	0.00212016	0.00156292	0.00234533	0.00213958	0
Nioro	0.00257285	0.00211941	0.00287831	0.00221066	0.00163517	0
Dangassa	0.0023815	0.00195234	0.00266938	0.00203667	0.00145249	0.000754027	0
Table S3.3	Fst between years of sampling
	2007	2013	2015	2016
2013	0.00490925
2015	0.0141581	0.0121046
2016	0.010213	0.00792933	0.0123448
2017	0.0187696	0.0151831	0.0235736	0.0162316
Table S3.4	Jost's D between years of sampling
	2007	2013	2015	2016
2013	0.00245618
2015	0.00669348	0.0058948
2016	0.00488862	0.00390495	0.00570712
2017	0.00887667	0.00738566	0.0107684	0.00749803
Table S3.5	Jost's D between isolates sampled in different years from Faladje
	2007	2013
2013	0.00245618
pop2015.17	0.00411252	0.00313137
Table S3.6	Weir And Cockerham's Fst between isolates sampled in different years from Faladje
	2007	2013
2013	0.00490925
pop2015.17	0.00858275	0.00635277

## Sheet: Table_S4. Top Diffstats loci
SNP	SNP.Id	Chromosome	Position	Gene ID	Protein description	Gene Symbol	Major Allele	Minor Allele	Codon	Major Product	Minor Product	Has.Non.synonymous	All_Geopops	Falaje2007vs2013	Falaje2007vs2017	Falaje2013vs2017	All_Geopops	Falaje2007vs2013	Falaje2007vs2017	Falaje2013vs2017	Poppairs>threshold	Dmax
Pf3D7_01_v3_144877	NGS_SNP.Pf3D7_01_v3.144877	Pf3D7_01_v3	144877	PF3D7_0103300	conserved protein, unknown function		A (0.52)	G (0.48)	507	V	A	Has Non-Synonymous	0.00269738	0.100275	0.080068	0		1			1	0.100275
Pf3D7_01_v3_180299	NGS_SNP.Pf3D7_01_v3.180299	Pf3D7_01_v3	180299	PF3D7_0104100	protein E140, putative		C (0.57)	G (0.43)	629	R	G	Has Non-Synonymous	0.0155877	0	0.0422354	0.0464659				1	1	0.0464659
Pf3D7_01_v3_180311	NGS_SNP.Pf3D7_01_v3.180311	Pf3D7_01_v3	180311	PF3D7_0104100	protein E140, putative		A (0.51)	C (0.49)	633	H	N	Has Non-Synonymous	0.0128496	0	0.0486496	0.0503724				1	1	0.0503724
Pf3D7_01_v3_239972	NGS_SNP.Pf3D7_01_v3.239972	Pf3D7_01_v3	239972	PF3D7_0105700	asparagine-rich antigen Pfa35-2		A (0.6)	G (0.4)	436	N	S	Has Non-Synonymous	0	0.0947284	0.0773211	0		1			1	0.0947284
Pf3D7_01_v3_388752	NGS_SNP.Pf3D7_01_v3.388752	Pf3D7_01_v3	388752	PF3D7_0110000	conserved Plasmodium protein, unknown function		A (0.65)	C (0.35)	127	E	D	Has Non-Synonymous	0.0245426	0	0.00553878	0.0134807	1				1	0.0245426
Pf3D7_01_v3_487057	NGS_SNP.Pf3D7_01_v3.487057	Pf3D7_01_v3	487057	PF3D7_0112900	Plasmodium exported protein, unknown function		T (0.58)	C (0.42)	146	H	N/A	Synonymous	0	0.113075	0.117739	0		1	1		2	0.117739
Pf3D7_01_v3_495649	NGS_SNP.Pf3D7_01_v3.495649	Pf3D7_01_v3	495649	PF3D7_0113100	surface-associated interspersed protein 1.1 (SURFIN 1.1)	SURF1.1	C (0.65)	A (0.35)	136	Q	K	Has Non-Synonymous	0.0271106	0.0076569	0	0.00295793	1				1	0.0271106
Pf3D7_01_v3_535030	NGS_SNP.Pf3D7_01_v3.535030	Pf3D7_01_v3	535030	PF3D7_0113800	DBL containing protein, unknown function		A (0.5)	T (0.5)	2461	Y	F	Has Non-Synonymous	0.0140349	0	0.0506672	0.057752				1	1	0.057752
Pf3D7_01_v3_528354	NGS_SNP.Pf3D7_01_v3.528354	Pf3D7_01_v3	528354	PF3D7_0113800	DBL containing protein, unknown function		G (0.52)	A (0.48)	416	K	N/A	Synonymous	0	0.0687038	0.196676	0.0292698			1		1	0.196676
Pf3D7_02_v3_503292	NGS_SNP.Pf3D7_02_v3.503292	Pf3D7_02_v3	503292	PF3D7_0212400	conserved Plasmodium membrane protein, unknown function		T (0.62)	A (0.38)	1521	Q	H	Has Non-Synonymous	0.0237857	0.0161235	0.0746977	0.0130639	1				1	0.0746977
Pf3D7_02_v3_666154	NGS_SNP.Pf3D7_02_v3.666154	Pf3D7_02_v3	666154	PF3D7_0216100	conserved Plasmodium protein, unknown function		T (0.54)	A (0.46)	793	T	N/A	Synonymous	0.0140693	0	0.0610045	0.0617348				1	1	0.0617348
Pf3D7_03_v3_360119	NGS_SNP.Pf3D7_03_v3.360119	Pf3D7_03_v3	360119	PF3D7_0308100	zinc finger protein, putative		A (0.57)	G (0.43)	1267	I	M	Has Non-Synonymous	0.00249956	0.103904	0.111996	0		1	1		2	0.111996
Pf3D7_03_v3_565085	NGS_SNP.Pf3D7_03_v3.565085	Pf3D7_03_v3	565085	PF3D7_0313900	conserved Plasmodium protein, unknown function		T (0.58)	G (0.42)	191	N	T	Has Non-Synonymous	0.00502272	0.0969739	0.00739542	0.0299517		1			1	0.0969739
Pf3D7_03_v3_892443	NGS_SNP.Pf3D7_03_v3.892443	Pf3D7_03_v3	892443	PF3D7_0321300	conserved Plasmodium protein, unknown function		G (0.55)	A (0.45)	108	H	Y	Has Non-Synonymous	0.0213772	0.0218339	0.0548097	0.000196649	1				1	0.0548097
Pf3D7_03_v3_890218	NGS_SNP.Pf3D7_03_v3.890218	Pf3D7_03_v3	890218	PF3D7_0321300	conserved Plasmodium protein, unknown function		A (0.58)	G (0.42)	849	H	N/A	Synonymous	0.0112197	0	0.0874586	0.0813355				1	1	0.0874586
Pf3D7_03_v3_916639	NGS_SNP.Pf3D7_03_v3.916639	Pf3D7_03_v3	916639	PF3D7_0321800	WD repeat-containing protein, putative		A (0.79)	C (0.21)	1242	R	N/A	Synonymous	0.00612717	0.0966987	0.0256102	0.0150444		1			1	0.0966987
Pf3D7_04_v3_110013	NGS_SNP.Pf3D7_04_v3.110013	Pf3D7_04_v3	110013	PF3D7_0401900	acyl-CoA synthetase	ACS6	C (0.78)	G (0.22)	428	W	C	Has Non-Synonymous	0.0306528	0.0454092	0.0922713	0.00229201	1		1		2	0.0922713
Pf3D7_04_v3_110012	NGS_SNP.Pf3D7_04_v3.110012	Pf3D7_04_v3	110012	PF3D7_0401900	acyl-CoA synthetase	ACS6	C (0.64)	A (0.36)	428	W	C	Has Non-Synonymous	0.0261849	0.0088736	0.142411	0.0617271	1		1	1	3	0.142411
Pf3D7_04_v3_140930	NGS_SNP.Pf3D7_04_v3.140930	Pf3D7_04_v3	140930	PF3D7_0402300	reticulocyte binding protein homologue 1	RH1	G (0.59)	A (0.41)	1065	V	I	Has Non-Synonymous	0.0178203	0.00690341	0.0976913	0.0355781			1		1	0.0976913
Pf3D7_04_v3_389962	NGS_SNP.Pf3D7_04_v3.389962	Pf3D7_04_v3	389962	PF3D7_0407800	protein CINCH	CINCH	A (0.8)	G (0.2)	1680	N	S	Has Non-Synonymous	0.0248655	0	0	0.00240094	1				1	0.0248655
Pf3D7_04_v3_738775	NGS_SNP.Pf3D7_04_v3.738775	Pf3D7_04_v3	738775	PF3D7_0416900	conserved Plasmodium protein, unknown function		A (0.64)	G (0.36)	366	F	N/A	Synonymous	0.00867996	0.0543661	0.267407	0.0800481			1	1	2	0.267407
Pf3D7_04_v3_748239	NGS_SNP.Pf3D7_04_v3.748239	Pf3D7_04_v3	748239	PF3D7_0417200	bifunctional dihydrofolate reductase-thymidylate synthase	DHFR-TS	T (0.79)	A (0.21)	51	I	N	Has Non-Synonymous	0.0371221	0.053487	0.337588	0.128187	1		1	1	3	0.337588
Pf3D7_04_v3_748262	NGS_SNP.Pf3D7_04_v3.748262	Pf3D7_04_v3	748262	PF3D7_0417200	bifunctional dihydrofolate reductase-thymidylate synthase	DHFR-TS	C (0.66)	T (0.34)	59	R	C	Has Non-Synonymous	0.0348265	0.0740697	0.365468	0.121712	1	1	1	1	4	0.365468
Pf3D7_04_v3_757119	NGS_SNP.Pf3D7_04_v3.757119	Pf3D7_04_v3	757119	PF3D7_0417400	conserved Plasmodium protein, unknown function		G (0.54)	A (0.46)	276	V	I	Has Non-Synonymous	0.00855481	0.0882927	0.267407	0.0487185		1	1	1	3	0.267407
Pf3D7_04_v3_839310	NGS_SNP.Pf3D7_04_v3.839310	Pf3D7_04_v3	839310	PF3D7_0418600	regulator of chromosome condensation, putative		G (0.6)	A (0.4)	1639	K	N/A	Synonymous	0.00782015	0.0863293	0.0432323	0.00189259		1			1	0.0863293
Pf3D7_04_v3_850002	NGS_SNP.Pf3D7_04_v3.850002	Pf3D7_04_v3	850002	PF3D7_0419000	conserved Plasmodium protein, unknown function		T (0.76)	C (0.24)	30	L	N/A	Synonymous	0.032131	0	0.0289844	0.0376466	1				1	0.0376466
Pf3D7_04_v3_863381	NGS_SNP.Pf3D7_04_v3.863381	Pf3D7_04_v3	863381	PF3D7_0419400	conserved Plasmodium protein, unknown function		C (0.52)	T (0.48)	1795	T	M	Has Non-Synonymous	0.018085	0.0515265	0	0.054441				1	1	0.054441
Pf3D7_04_v3_898452	NGS_SNP.Pf3D7_04_v3.898452	Pf3D7_04_v3	898452	PF3D7_0420000	zinc finger protein, putative		A (0.5)	G (0.5)	2091	I	N/A	Synonymous	0.0371959	0.0997585	0.161103	0.00135443	1	1	1		3	0.161103
Pf3D7_04_v3_908685	NGS_SNP.Pf3D7_04_v3.908685	Pf3D7_04_v3	908685	PF3D7_0420100	serine/threonine protein kinase RIO2	RIO2	G (0.72)	A (0.28)	544	V	I	Has Non-Synonymous	0.00196868	0.0853054	0.0204982	0.0111213		1			1	0.0853054
Pf3D7_04_v3_911083	NGS_SNP.Pf3D7_04_v3.911083	Pf3D7_04_v3	911083	PF3D7_0420200	holo-[acyl-carrier-protein] synthase, putative	ACPS	A (0.59)	G (0.41)	299	K	N/A	Synonymous	0.00203795	0.0144044	0.0917347	0.0234939			1		1	0.0917347
Pf3D7_04_v3_999679	NGS_SNP.Pf3D7_04_v3.999679	Pf3D7_04_v3	999679	PF3D7_0422000	steroid dehydrogenase, putative		A (0.57)	T (0.43)	185	I	N/A	Synonymous	0.0326955	0	0	0.00196452	1				1	0.0326955
Pf3D7_04_v3_1002051	NGS_SNP.Pf3D7_04_v3.1002051	Pf3D7_04_v3	1002051	PF3D7_0422100	transmembrane emp24 domain-containing protein, putative		T (0.68)	A (0.32)	147	Y	N	Has Non-Synonymous	0	0.0978138	0.0296659	0.011018		1			1	0.0978138
Pf3D7_04_v3_1005986	NGS_SNP.Pf3D7_04_v3.1005986	Pf3D7_04_v3	1005986	PF3D7_0422200	erythrocyte membrane-associated antigen		C (0.62)	T (0.38)	3754	K	R	Has Non-Synonymous	0.0266518	0	0.00689226	0.00656925	1				1	0.0266518
Pf3D7_04_v3_1005987	NGS_SNP.Pf3D7_04_v3.1005987	Pf3D7_04_v3	1005987	PF3D7_0422200	erythrocyte membrane-associated antigen		T (0.62)	C (0.38)	3754	K	R	Has Non-Synonymous	0.0259568	0	0.00378795	0.00404041	1				1	0.0259568
Pf3D7_04_v3_1037822	NGS_SNP.Pf3D7_04_v3.1037822	Pf3D7_04_v3	1037822	PF3D7_0422500	pre-mRNA-splicing helicase BRR2, putative	BRR2	G (0.61)	A (0.39)	2832	V	I	Has Non-Synonymous	0.00820366	0.0327175	0.000118423	0.0934305				1	1	0.0934305
Pf3D7_04_v3_1063155	NGS_SNP.Pf3D7_04_v3.1063155	Pf3D7_04_v3	1063155	PF3D7_0423600	conserved Plasmodium protein, unknown function		T (0.67)	C (0.33)	1158	V	N/A	Synonymous	0.00154875	0.00468521	0.0062598	0.0584036				1	1	0.0584036
Pf3D7_04_v3_1134544	NGS_SNP.Pf3D7_04_v3.1134544	Pf3D7_04_v3	1134544	PF3D7_0425100	Plasmodium exported protein (hyp6), unknown function		A (0.66)	C (0.34)	163	H	Q	Has Non-Synonymous	0.0126262	0.0951246	0.0268141	0.0137499		1			1	0.0951246
Pf3D7_04_v3_1134777	NGS_SNP.Pf3D7_04_v3.1134777	Pf3D7_04_v3	1134777	PF3D7_0425100	Plasmodium exported protein (hyp6), unknown function		C (0.72)	G (0.28)	86	E	Q	Has Non-Synonymous	0.00186035	0	0.0386296	0.0727781				1	1	0.0727781
Pf3D7_04_v3_1137348	NGS_SNP.Pf3D7_04_v3.1137348	Pf3D7_04_v3	1137348	PF3D7_0425200	Plasmodium exported protein (hyp15), unknown function		T (0.58)	C (0.42)	219	F	S	Has Non-Synonymous	0.0315066	0	0	0.0159522	1				1	0.0315066
Pf3D7_04_v3_1137285	NGS_SNP.Pf3D7_04_v3.1137285	Pf3D7_04_v3	1137285	PF3D7_0425200	Plasmodium exported protein (hyp15), unknown function		C (0.72)	T (0.28)	198	A	V	Has Non-Synonymous	0.0258057	0	0	0	1				1	0.0258057
Pf3D7_04_v3_1137276	NGS_SNP.Pf3D7_04_v3.1137276	Pf3D7_04_v3	1137276	PF3D7_0425200	Plasmodium exported protein (hyp15), unknown function		C (0.64)	T (0.36)	195	A	V	Has Non-Synonymous	0.0250388	0.00917923	0	0.00390719	1				1	0.0250388
Pf3D7_04_v3_1137262	NGS_SNP.Pf3D7_04_v3.1137262	Pf3D7_04_v3	1137262	PF3D7_0425200	Plasmodium exported protein (hyp15), unknown function		G (0.71)	T (0.29)	190	T	I	Has Non-Synonymous	0.0245055	0.0371931	0	0.00505917	1				1	0.0371931
Pf3D7_04_v3_1137298	NGS_SNP.Pf3D7_04_v3.1137298	Pf3D7_04_v3	1137298	PF3D7_0425200	Plasmodium exported protein (hyp15), unknown function		A (0.63)	C (0.37)	202	L	F	Has Non-Synonymous	0.0235055	0.0365854	0	0.0122297	1				1	0.0365854
Pf3D7_05_v3_202752	NGS_SNP.Pf3D7_05_v3.202752	Pf3D7_05_v3	202752	PF3D7_0504800	conserved Plasmodium protein, unknown function		C (0.6)	T (0.4)	661	G	R	Has Non-Synonymous	0.0380499	0	0.054557	0.0493605	1			1	2	0.054557
Pf3D7_05_v3_482152	NGS_SNP.Pf3D7_05_v3.482152	Pf3D7_05_v3	482152	PF3D7_0511400	conserved Plasmodium protein, unknown function		G (0.73)	A (0.27)	244	V	I	Has Non-Synonymous	0.0245843	0.00275495	0.0746648	0.0311249	1				1	0.0746648
Pf3D7_05_v3_673393	NGS_SNP.Pf3D7_05_v3.673393	Pf3D7_05_v3	673393	PF3D7_0516100	cation-transporting ATPase 1	ATPase1	A (0.58)	G (0.42)	1970	R	G	Has Non-Synonymous	0.0251509	0	0	0	1				1	0.0251509
Pf3D7_05_v3_679399	NGS_SNP.Pf3D7_05_v3.679399	Pf3D7_05_v3	679399	PF3D7_0516300	tRNA pseudouridine synthase, putative		T (0.58)	C (0.42)	164	L	N/A	Synonymous	0.0235501	0.00159951	0	0	1				1	0.0235501
Pf3D7_05_v3_750723	NGS_SNP.Pf3D7_05_v3.750723	Pf3D7_05_v3	750723	PF3D7_0518000	NOSIP domain-containing protein, putative		A (0.79)	G (0.21)	21	K	N/A	Synonymous	0.0375123	0	0	0	1				1	0.0375123
Pf3D7_05_v3_931606	NGS_SNP.Pf3D7_05_v3.931606	Pf3D7_05_v3	931606	PF3D7_0522400	conserved Plasmodium protein, unknown function		C (0.78)	G (0.22)	7739	P	A	Has Non-Synonymous	0.0268508	0.00295312	0.00878794	0	1				1	0.0268508
Pf3D7_05_v3_935006	NGS_SNP.Pf3D7_05_v3.935006	Pf3D7_05_v3	935006	PF3D7_0522400	conserved Plasmodium protein, unknown function		T (0.86)	C (0.14)	8872	V	A	Has Non-Synonymous	0.0237493	0.0377292	0.0337817	0	1				1	0.0377292
Pf3D7_05_v3_921360	NGS_SNP.Pf3D7_05_v3.921360	Pf3D7_05_v3	921360	PF3D7_0522400	conserved Plasmodium protein, unknown function		C (0.53)	A (0.47)	4380	K	T	Has Non-Synonymous	0.00488441	0.0516133	0.101494	0.0021743			1		1	0.101494
Pf3D7_05_v3_1043653	NGS_SNP.Pf3D7_05_v3.1043653	Pf3D7_05_v3	1043653	PF3D7_0525100	acyl-CoA synthetase	ACS10	G (0.6)	A (0.4)	637	A	T	Has Non-Synonymous	0.00854402	0.0668901	0.11376	0.00200836			1		1	0.11376
Pf3D7_05_v3_1082409	NGS_SNP.Pf3D7_05_v3.1082409	Pf3D7_05_v3	1082409	PF3D7_0526200	ADP-ribosylation factor GTPase-activating protein 2	ARFGAP2	G (0.59)	C (0.41)	N/A	H	D	Has Non-Synonymous	0.0219218	0	0	0	1				1	0.0219218
Pf3D7_05_v3_1271257	NGS_SNP.Pf3D7_05_v3.1271257	Pf3D7_05_v3	1271257	PF3D7_0531100	conserved Plasmodium protein, unknown function		G (0.53)	T (0.47)	2410	K	Q	Has Non-Synonymous	0.0228392	0	0	0.0105592	1				1	0.0228392
Pf3D7_05_v3_1301680	NGS_SNP.Pf3D7_05_v3.1301680	Pf3D7_05_v3	1301680	PF3D7_0532100	early transcribed membrane protein 5	ETRAMP5	G (0.66)	T (0.34)	153	D	Y	Has Non-Synonymous	0.0154132	0.0915704	0	0.0546951		1		1	2	0.0915704
Pf3D7_06_v3_114533	NGS_SNP.Pf3D7_06_v3.114533	Pf3D7_06_v3	114533	PF3D7_0602700	conserved Plasmodium protein, unknown function		T (0.59)	C (0.41)	231	K	R	Has Non-Synonymous	0.00072276	0.0797114	0.0755799	0		1			1	0.0797114
Pf3D7_06_v3_378542	NGS_SNP.Pf3D7_06_v3.378542	Pf3D7_06_v3	378542	PF3D7_0609000	nucleoporin NUP637, putative	NUP637	T (0.64)	C (0.36)	2761	M	T	Has Non-Synonymous	0.00472294	0	0.0693786	0.088504				1	1	0.088504
Pf3D7_06_v3_591985	NGS_SNP.Pf3D7_06_v3.591985	Pf3D7_06_v3	591985	PF3D7_0614100	filamin domain-containing protein, putative		G (0.57)	T (0.43)	94	H	N	Has Non-Synonymous	0.035546	0.0169293	0	0.0098119	1				1	0.035546
Pf3D7_06_v3_690352	NGS_SNP.Pf3D7_06_v3.690352	Pf3D7_06_v3	690352	PF3D7_0616600	conserved protein, unknown function		G (0.51)	A (0.49)	260	D	N/A	Synonymous	0.00773378	0.0817806	0.0621675	0		1			1	0.0817806
Pf3D7_06_v3_851979	NGS_SNP.Pf3D7_06_v3.851979	Pf3D7_06_v3	851979	PF3D7_0620400	merozoite surface protein 10	MSP10	A (0.57)	G (0.43)	326	L	S	Has Non-Synonymous	0.0337771	0	0	0.0103093	1				1	0.0337771
Pf3D7_06_v3_938238	NGS_SNP.Pf3D7_06_v3.938238	Pf3D7_06_v3	938238	PF3D7_0623000	chorismate synthase	CS	A (0.64)	G (0.36)	138	C	N/A	Synonymous	0.00725983	0.025468	0.00897797	0.0910312				1	1	0.0910312
Pf3D7_06_v3_1111541	NGS_SNP.Pf3D7_06_v3.1111541	Pf3D7_06_v3	1111541	PF3D7_0627700	transportin		C (0.68)	T (0.32)	1115	P	N/A	Synonymous	0.00811885	0	0.0523949	0.0756965				1	1	0.0756965
Pf3D7_06_v3_1160911	NGS_SNP.Pf3D7_06_v3.1160911	Pf3D7_06_v3	1160911	PF3D7_0628200	eukaryotic translation initiation factor 2-alpha kinase	PK4	C (0.91)	A (0.09)	350	D	E	Has Non-Synonymous	0.00534781	0.0684463	0.0975008	0			1		1	0.0975008
Pf3D7_06_v3_1282691	NGS_SNP.Pf3D7_06_v3.1282691	Pf3D7_06_v3	1282691	PF3D7_0630600	deubiquitinating enzyme MINDY, putative		A (0.58)	G (0.42)	803	K	N/A	Synonymous	0.00568797	0.0727093	0.122735	0.00177169		1	1		2	0.122735
Pf3D7_07_v3_224729	NGS_SNP.Pf3D7_07_v3.224729	Pf3D7_07_v3	224729	PF3D7_0704600	HECT-type E3 ubiquitin ligase UT	UT	A (0.68)	T (0.32)	1387	F	Y	Has Non-Synonymous	0.0231266	0	0	0	1				1	0.0231266
Pf3D7_07_v3_257052	NGS_SNP.Pf3D7_07_v3.257052	Pf3D7_07_v3	257052	PF3D7_0705200	conserved Plasmodium protein, unknown function		T (0.78)	C (0.22)	323	Y	H	Has Non-Synonymous	0	0.0802197	0.0591653	0		1			1	0.0802197
Pf3D7_07_v3_333407	NGS_SNP.Pf3D7_07_v3.333407	Pf3D7_07_v3	333407	PF3D7_0707200	conserved Plasmodium protein, unknown function		T (0.5)	A (0.5)	973	F	L	Has Non-Synonymous	0.0258503	0	0.00486444	0.00251559	1				1	0.0258503
Pf3D7_07_v3_385921	NGS_SNP.Pf3D7_07_v3.385921	Pf3D7_07_v3	385921	PF3D7_0708500	heat shock protein 86 family protein		C (0.56)	T (0.44)	801	D	N	Has Non-Synonymous	0.0222233	0.120314	0.189034	0.00346282	1	1	1		3	0.189034
Pf3D7_07_v3_404407	NGS_SNP.Pf3D7_07_v3.404407	Pf3D7_07_v3	404407	PF3D7_0709000	chloroquine resistance transporter	CRT	T (0.75)	G (0.25)	220	S	A	Has Non-Synonymous	0.0657264	0.164151	0.262854	0.00853111	1	1	1		3	0.262854
Pf3D7_07_v3_403625	NGS_SNP.Pf3D7_07_v3.403625	Pf3D7_07_v3	403625	PF3D7_0709000	chloroquine resistance transporter	CRT	C (0.68)	A (0.32)	76	T	K	Has Non-Synonymous	0.0419088	0.213244	0.285969	0.00156086	1	1	1		3	0.285969
Pf3D7_07_v3_404836	NGS_SNP.Pf3D7_07_v3.404836	Pf3D7_07_v3	404836	PF3D7_0709000	chloroquine resistance transporter	CRT	G (0.55)	C (0.45)	271	E	Q	Has Non-Synonymous	0.0413646	0.219208	0.306068	0.00401361	1	1	1		3	0.306068
Pf3D7_07_v3_421420	NGS_SNP.Pf3D7_07_v3.421420	Pf3D7_07_v3	421420	PF3D7_0709300	mediator of RNA polymerase II transcription subunit 14, putative	MED14	A (0.52)	G (0.48)	110	T	N/A	Synonymous	0.0224428	0.0939108	0.0692261	0	1	1			2	0.0939108
Pf3D7_07_v3_420925	NGS_SNP.Pf3D7_07_v3.420925	Pf3D7_07_v3	420925	PF3D7_0709300	mediator of RNA polymerase II transcription subunit 14, putative	MED14	G (0.55)	C (0.45)	275	H	Q	Has Non-Synonymous	0.0207138	0.0905952	0.0307522	0.00599975		1			1	0.0905952
Pf3D7_07_v3_419410	NGS_SNP.Pf3D7_07_v3.419410	Pf3D7_07_v3	419410	PF3D7_0709300	mediator of RNA polymerase II transcription subunit 14, putative	MED14	A (0.69)	G (0.31)	780	H	N/A	Synonymous	0.00906355	0.0912753	0.106214	0		1	1		2	0.106214
Pf3D7_07_v3_419413	NGS_SNP.Pf3D7_07_v3.419413	Pf3D7_07_v3	419413	PF3D7_0709300	mediator of RNA polymerase II transcription subunit 14, putative	MED14	G (0.7)	A (0.3)	779	C	N/A	Synonymous	0.00906355	0.0912753	0.106214	0		1	1		2	0.106214
Pf3D7_07_v3_416615	NGS_SNP.Pf3D7_07_v3.416615	Pf3D7_07_v3	416615	PF3D7_0709300	mediator of RNA polymerase II transcription subunit 14, putative	MED14	T (0.8)	A (0.2)	1712	H	L	Has Non-Synonymous	0.00464534	0.029656	0	0.0455448				1	1	0.0455448
Pf3D7_07_v3_419310	NGS_SNP.Pf3D7_07_v3.419310	Pf3D7_07_v3	419310	PF3D7_0709300	mediator of RNA polymerase II transcription subunit 14, putative	MED14	T (0.83)	A (0.17)	814	N	Y	Has Non-Synonymous	0.0042062	0.0504911	0.104051	0.00541569			1		1	0.104051
Pf3D7_07_v3_418720	NGS_SNP.Pf3D7_07_v3.418720	Pf3D7_07_v3	418720	PF3D7_0709300	mediator of RNA polymerase II transcription subunit 14, putative	MED14	A (0.72)	G (0.28)	1010	Y	N/A	Synonymous	0.00308749	0.0870592	0.0173048	0.0217721		1			1	0.0870592
Pf3D7_07_v3_418726	NGS_SNP.Pf3D7_07_v3.418726	Pf3D7_07_v3	418726	PF3D7_0709300	mediator of RNA polymerase II transcription subunit 14, putative	MED14	T (0.72)	G (0.28)	1008	T	N/A	Synonymous	0.00188692	0.0932555	0.0173048	0.0252582		1			1	0.0932555
Pf3D7_07_v3_426753	NGS_SNP.Pf3D7_07_v3.426753	Pf3D7_07_v3	426753	PF3D7_0709400	Cg7 protein		A (0.57)	T (0.43)	161	V	E	Has Non-Synonymous	0.0170764	0.0939762	0.10159	0		1	1		2	0.10159
Pf3D7_07_v3_435497	NGS_SNP.Pf3D7_07_v3.435497	Pf3D7_07_v3	435497	PF3D7_0709700	prodrug activation and resistance esterase	PARE	A (0.51)	T (0.49)	233	A	N/A	Synonymous	0.0134282	0.0894289	0.104397	0		1	1		2	0.104397
Pf3D7_07_v3_435368	NGS_SNP.Pf3D7_07_v3.435368	Pf3D7_07_v3	435368	PF3D7_0709700	prodrug activation and resistance esterase	PARE	C (0.51)	T (0.49)	276	L	N/A	Synonymous	0.00996243	0.0757805	0.0777343	0		1			1	0.0777343
Pf3D7_07_v3_445215	NGS_SNP.Pf3D7_07_v3.445215	Pf3D7_07_v3	445215	PF3D7_0709900	hydrolase, putative		G (0.54)	A (0.46)	223	R	C	Has Non-Synonymous	0	0.108778	0.0760295	0		1			1	0.108778
Pf3D7_07_v3_457269	NGS_SNP.Pf3D7_07_v3.457269	Pf3D7_07_v3	457269	PF3D7_0710000	conserved Plasmodium protein, unknown function		T (0.59)	G (0.41)	410	N	H	Has Non-Synonymous	0.0221402	0	0	0	1				1	0.0221402
Pf3D7_07_v3_452395	NGS_SNP.Pf3D7_07_v3.452395	Pf3D7_07_v3	452395	PF3D7_0710000	conserved Plasmodium protein, unknown function		A (0.61)	T (0.39)	1642	L	I	Has Non-Synonymous	0.0105302	0.0727093	0.102072	0		1	1		2	0.102072
Pf3D7_07_v3_450711	NGS_SNP.Pf3D7_07_v3.450711	Pf3D7_07_v3	450711	PF3D7_0710000	conserved Plasmodium protein, unknown function		T (0.79)	G (0.21)	2203	K	T	Has Non-Synonymous	0.00840472	0.0735701	0.11619	0.00335815		1	1		2	0.11619
Pf3D7_07_v3_451975	NGS_SNP.Pf3D7_07_v3.451975	Pf3D7_07_v3	451975	PF3D7_0710000	conserved Plasmodium protein, unknown function		T (0.68)	A (0.32)	1782	N	Y	Has Non-Synonymous	0	0.0399868	0.10359	0.00939473			1		1	0.10359
Pf3D7_07_v3_461139	NGS_SNP.Pf3D7_07_v3.461139	Pf3D7_07_v3	461139	PF3D7_0710100	conserved protein, unknown function		A (0.63)	G (0.37)	361	I	M	Has Non-Synonymous	0.0255762	0	0.0658385	0.0382413	1				1	0.0658385
Pf3D7_07_v3_463930	NGS_SNP.Pf3D7_07_v3.463930	Pf3D7_07_v3	463930	PF3D7_0710200	conserved Plasmodium protein, unknown function		G (0.55)	A (0.45)	276	D	N	Has Non-Synonymous	0.0114658	0.138982	0.14588	0		1	1		2	0.14588
Pf3D7_07_v3_463705	NGS_SNP.Pf3D7_07_v3.463705	Pf3D7_07_v3	463705	PF3D7_0710200	conserved Plasmodium protein, unknown function		A (0.56)	G (0.44)	201	T	A	Has Non-Synonymous	0.00460605	0.0278075	0.12243	0.0268559			1		1	0.12243
Pf3D7_07_v3_475324	NGS_SNP.Pf3D7_07_v3.475324	Pf3D7_07_v3	475324	PF3D7_0710400	DNA repair protein RAD14, putative	RAD14	G (0.76)	A (0.24)	234	L	N/A	Synonymous	0.0028067	0.175127	0.169827	0		1	1		2	0.175127
Pf3D7_07_v3_475469	NGS_SNP.Pf3D7_07_v3.475469	Pf3D7_07_v3	475469	PF3D7_0710400	DNA repair protein RAD14, putative	RAD14	G (0.54)	A (0.46)	283	D	N	Has Non-Synonymous	0.000922849	0	0.0893531	0.0523269			1	1	2	0.0893531
Pf3D7_07_v3_613596	NGS_SNP.Pf3D7_07_v3.613596	Pf3D7_07_v3	613596	PF3D7_0713400	GPCR-like receptor SR25	SR25	A (0.83)	C (0.17)	310	I	N/A	Synonymous	0.001223	0.0796071	0.0164194	0.0181829		1			1	0.0796071
Pf3D7_07_v3_637190	NGS_SNP.Pf3D7_07_v3.637190	Pf3D7_07_v3	637190	PF3D7_0713900	conserved Plasmodium protein, unknown function		A (0.58)	T (0.42)	196	F	Y	Has Non-Synonymous	0.0038536	0.0815978	0.0465272	0		1			1	0.0815978
Pf3D7_07_v3_635776	NGS_SNP.Pf3D7_07_v3.635776	Pf3D7_07_v3	635776	PF3D7_0713900	conserved Plasmodium protein, unknown function		A (0.6)	G (0.4)	667	A	N/A	Synonymous	0.00144378	0.0275832	0.13028	0.0305638			1		1	0.13028
Pf3D7_07_v3_631730	NGS_SNP.Pf3D7_07_v3.631730	Pf3D7_07_v3	631730	PF3D7_0713900	conserved Plasmodium protein, unknown function		C (0.81)	T (0.19)	2016	S	N	Has Non-Synonymous	0.00102122	0.092635	0.124814	0.000147075		1	1		2	0.124814
Pf3D7_07_v3_635759	NGS_SNP.Pf3D7_07_v3.635759	Pf3D7_07_v3	635759	PF3D7_0713900	conserved Plasmodium protein, unknown function		G (0.6)	T (0.4)	673	T	N	Has Non-Synonymous	0.000975654	0.0568554	0.13892	0.0124647			1		1	0.13892
Pf3D7_07_v3_631726	NGS_SNP.Pf3D7_07_v3.631726	Pf3D7_07_v3	631726	PF3D7_0713900	conserved Plasmodium protein, unknown function		C (0.81)	T (0.19)	2017	K	N/A	Synonymous	0.000534096	0.092635	0.112897	0		1	1		2	0.112897
Pf3D7_07_v3_851697	NGS_SNP.Pf3D7_07_v3.851697	Pf3D7_07_v3	851697	PF3D7_0719400	conserved Plasmodium protein, unknown function		A (0.71)	T (0.29)	633	C	S	Has Non-Synonymous	0.000512873	0.0538602	0.170572	0.0289815			1		1	0.170572
Pf3D7_07_v3_910194	NGS_SNP.Pf3D7_07_v3.910194	Pf3D7_07_v3	910194	PF3D7_0721000	conserved Plasmodium membrane protein, unknown function		G (0.71)	A (0.29)	1968	R	K	Has Non-Synonymous	4.27e-05	0.000441793	0.0866817	0.050109				1	1	0.0866817
Pf3D7_07_v3_1148859	NGS_SNP.Pf3D7_07_v3.1148859	Pf3D7_07_v3	1148859	PF3D7_0727000	vacuolar protein sorting-associated protein 53, putative	VPS53	C (0.57)	G (0.43)	734	D	H	Has Non-Synonymous	0.0154695	0.00500148	0.117639	0.053653			1	1	2	0.117639
Pf3D7_07_v3_1159955	NGS_SNP.Pf3D7_07_v3.1159955	Pf3D7_07_v3	1159955	PF3D7_0727300	DNA (cytosine-5)-methyltransferase	DNMT	G (0.65)	A (0.35)	622	A	N/A	Synonymous	0.00747996	0.0762109	0.0530619	0		1			1	0.0762109
Pf3D7_07_v3_1259341	NGS_SNP.Pf3D7_07_v3.1259341	Pf3D7_07_v3	1259341	PF3D7_0729600	COX assembly mitochondrial protein, putative	CMC1	A (0.56)	G (0.44)	91	R	N/A	Synonymous	0.0336417	0.0127793	0.00341978	0	1				1	0.0336417
Pf3D7_08_v3_423537	NGS_SNP.Pf3D7_08_v3.423537	Pf3D7_08_v3	423537	PF3D7_0808400	coatomer subunit epsilon, putative	SEC28	T (0.64)	C (0.36)	4	L	P	Has Non-Synonymous	0.0253526	0	0	0.00781203	1				1	0.0253526
Pf3D7_08_v3_499624	NGS_SNP.Pf3D7_08_v3.499624	Pf3D7_08_v3	499624	PF3D7_0809700	RuvB-like helicase 1	RUVB1	T (0.9)	G (0.1)	468	R	N/A	Synonymous	0.000700225	0.0773202	0.0544889	0.000418066		1			1	0.0773202
Pf3D7_08_v3_509321	NGS_SNP.Pf3D7_08_v3.509321	Pf3D7_08_v3	509321	PF3D7_0809900	JmjC domain-containing protein 1, putative	JmjC1	G (0.76)	A (0.24)	1036	L	N/A	Synonymous	0.00886932	0	0.0392487	0.048581				1	1	0.048581
Pf3D7_08_v3_549685	NGS_SNP.Pf3D7_08_v3.549685	Pf3D7_08_v3	549685	PF3D7_0810800	hydroxymethyldihydropterin pyrophosphokinase-dihydropteroate synthase	PPPK-DHPS	G (0.65)	C (0.35)	437	G	A	Has Non-Synonymous	0.037749	0.00530368	0.150735	0.0776032	1		1	1	3	0.150735
Pf3D7_08_v3_548801	NGS_SNP.Pf3D7_08_v3.548801	Pf3D7_08_v3	548801	PF3D7_0810800	hydroxymethyldihydropterin pyrophosphokinase-dihydropteroate synthase	PPPK-DHPS	G (0.61)	A (0.39)	142	K	N/A	Synonymous	0.0352103	0	0	0.0015759	1				1	0.0352103
Pf3D7_08_v3_701557	NGS_SNP.Pf3D7_08_v3.701557	Pf3D7_08_v3	701557	PF3D7_0814500	conserved protein, unknown function		T (0.6)	G (0.4)	394	G	N/A	Synonymous	0.0251344	0.0653075	0.0947952	0	1		1		2	0.0947952
Pf3D7_08_v3_701542	NGS_SNP.Pf3D7_08_v3.701542	Pf3D7_08_v3	701542	PF3D7_0814500	conserved protein, unknown function		C (0.6)	T (0.4)	389	N	N/A	Synonymous	0.0236029	0.0683537	0.0664236	0	1				1	0.0683537
Pf3D7_08_v3_701614	NGS_SNP.Pf3D7_08_v3.701614	Pf3D7_08_v3	701614	PF3D7_0814500	conserved protein, unknown function		A (0.65)	G (0.35)	413	T	N/A	Synonymous	0.000782298	0.0937809	0.0964318	0		1	1		2	0.0964318
Pf3D7_08_v3_711421	NGS_SNP.Pf3D7_08_v3.711421	Pf3D7_08_v3	711421	PF3D7_0815100	heptatricopeptide repeat and RAP domain-containing protein, putative		T (0.68)	C (0.32)	61	N	N/A	Synonymous	0.00175664	0.0102104	0.0904199	0.028175			1		1	0.0904199
Pf3D7_08_v3_771719	NGS_SNP.Pf3D7_08_v3.771719	Pf3D7_08_v3	771719	PF3D7_0816900	adenylate kinase 2	AK2	A (0.72)	G (0.28)	258	S	N/A	Synonymous	0.00925599	0	0.040665	0.0471537				1	1	0.0471537
Pf3D7_08_v3_846225	NGS_SNP.Pf3D7_08_v3.846225	Pf3D7_08_v3	846225	PF3D7_0818600	BEM46-like protein, putative	PBLP	G (0.57)	T (0.43)	134	H	N	Has Non-Synonymous	0.021597	0.00207261	0	0	1				1	0.021597
Pf3D7_08_v3_933060	NGS_SNP.Pf3D7_08_v3.933060	Pf3D7_08_v3	933060	PF3D7_0820700	2-oxoglutarate dehydrogenase E1 component	KDH	C (0.63)	T (0.37)	184	S	F	Has Non-Synonymous	0	0.0232194	0	0.0511368				1	1	0.0511368
Pf3D7_08_v3_1062754	NGS_SNP.Pf3D7_08_v3.1062754	Pf3D7_08_v3	1062754	PF3D7_0824400	nucleoside transporter 2	NT2	T (0.76)	C (0.24)	436	P	N/A	Synonymous	0.000657555	0.0774993	0.0256665	0.00743425		1			1	0.0774993
Pf3D7_08_v3_1099848	NGS_SNP.Pf3D7_08_v3.1099848	Pf3D7_08_v3	1099848	PF3D7_0825500	protein KRI1, putative	KRI1	A (0.76)	G (0.24)	455	G	N/A	Synonymous	0	0.0331818	0.101243	0.0131907			1		1	0.101243
Pf3D7_08_v3_1314831	NGS_SNP.Pf3D7_08_v3.1314831	Pf3D7_08_v3	1314831	PF3D7_0830800	surface-associated interspersed protein 8.2 (SURFIN 8.2)	SURF8.2	A (0.78)	G (0.22)	1342	K	N/A	Synonymous	0	3.43e-05	0.00880227	0.0438955				1	1	0.0438955
Pf3D7_08_v3_1325187	NGS_SNP.Pf3D7_08_v3.1325187	Pf3D7_08_v3	1325187	PF3D7_0831100	surface-associated interspersed protein 8.1 (SURFIN 8.1)	SURF8.1	A (0.67)	T (0.33)	15	N	I	Has Non-Synonymous	0	0.0999996	0.021729	0.0211573		1			1	0.0999996
Pf3D7_08_v3_1363159	NGS_SNP.Pf3D7_08_v3.1363159	Pf3D7_08_v3	1363159	PF3D7_0831600	cytoadherence linked asexual protein 8	CLAG8	C (0.51)	T (0.49)	1242	Y	N/A	Synonymous	0.00754453	0.072719	0	0.0327512		1			1	0.072719
Pf3D7_09_v3_145143	NGS_SNP.Pf3D7_09_v3.145143	Pf3D7_09_v3	145143	PF3D7_0903300	conserved protein, unknown function		A (0.73)	T (0.27)	1389	K	N	Has Non-Synonymous	0.00377741	0	0.117295	0.0905778			1	1	2	0.117295
Pf3D7_09_v3_158728	NGS_SNP.Pf3D7_09_v3.158728	Pf3D7_09_v3	158728	PF3D7_0903400	ATP-dependent RNA helicase DDX60, putative	DDX60	T (0.59)	C (0.41)	272	I	V	Has Non-Synonymous	0.00157996	0.0489268	0	0.0829425				1	1	0.0829425
Pf3D7_09_v3_515904	NGS_SNP.Pf3D7_09_v3.515904	Pf3D7_09_v3	515904	PF3D7_0911300	cysteine repeat modular protein 1	CRMP1	C (0.63)	A (0.37)	1480	H	N	Has Non-Synonymous	0.0052185	0.0099743	0.116406	0.0450991			1	1	2	0.116406
Pf3D7_09_v3_1270380	NGS_SNP.Pf3D7_09_v3.1270380	Pf3D7_09_v3	1270380	PF3D7_0931700	PIH1 domain-containing protein, putative		C (0.67)	T (0.33)	76	L	F	Has Non-Synonymous	0.00513936	0.0197901	0	0.0512154				1	1	0.0512154
Pf3D7_09_v3_1405681	NGS_SNP.Pf3D7_09_v3.1405681	Pf3D7_09_v3	1405681	PF3D7_0935600	gametocytogenesis-implicated protein	GIG	T (0.83)	G (0.17)	164	S	A	Has Non-Synonymous	0.00668595	0.0755939	0.10973	0.000258223		1	1		2	0.10973
Pf3D7_09_v3_1406576	NGS_SNP.Pf3D7_09_v3.1406576	Pf3D7_09_v3	1406576	PF3D7_0935600	gametocytogenesis-implicated protein	GIG	A (0.81)	G (0.19)	365	I	V	Has Non-Synonymous	0.00298007	0.0908882	0.104923	0		1	1		2	0.104923
Pf3D7_09_v3_1406520	NGS_SNP.Pf3D7_09_v3.1406520	Pf3D7_09_v3	1406520	PF3D7_0935600	gametocytogenesis-implicated protein	GIG	T (0.91)	A (0.09)	346	L	H	Has Non-Synonymous	0.00267142	0.0830804	0.0970926	0		1	1		2	0.0970926
Pf3D7_10_v3_152974	NGS_SNP.Pf3D7_10_v3.152974	Pf3D7_10_v3	152974	PF3D7_1003400	conserved Plasmodium protein, unknown function		G (0.61)	T (0.39)	1848	T	N	Has Non-Synonymous	0	0.083883	0.011827	0.0196561		1			1	0.083883
Pf3D7_10_v3_223211	NGS_SNP.Pf3D7_10_v3.223211	Pf3D7_10_v3	223211	PF3D7_1004800	ADP,ATP carrier protein 2	AAC2	A (0.53)	G (0.47)	268	R	N/A	Synonymous	0.0073409	0.0813131	0.0142722	0.0141233		1			1	0.0813131
Pf3D7_10_v3_331755	NGS_SNP.Pf3D7_10_v3.331755	Pf3D7_10_v3	331755	PF3D7_1008100	PHD finger protein PHD1	PHD1	T (0.99)	C (0.02)	170	I	N	Has Non-Synonymous	0.0420479	0.000117386	0.0793029	0.0907574	1			1	2	0.0907574
Pf3D7_10_v3_335297	NGS_SNP.Pf3D7_10_v3.335297	Pf3D7_10_v3	335297	PF3D7_1008100	PHD finger protein PHD1	PHD1	G (0.56)	A (0.44)	1351	S	N	Has Non-Synonymous	0.0138804	0.127389	0.0157008	0.0349381		1			1	0.127389
Pf3D7_10_v3_675913	NGS_SNP.Pf3D7_10_v3.675913	Pf3D7_10_v3	675913	PF3D7_1016800	Plasmodium exported protein (PHISTc), unknown function		A (0.56)	C (0.44)	109	Y	D	Has Non-Synonymous	0.0042561	0.0230123	0.102648	0.0198899			1		1	0.102648
Pf3D7_10_v3_676002	NGS_SNP.Pf3D7_10_v3.676002	Pf3D7_10_v3	676002	PF3D7_1016800	Plasmodium exported protein (PHISTc), unknown function		T (0.56)	C (0.44)	79	K	R	Has Non-Synonymous	0	0.0316955	0.110914	0.016719			1		1	0.110914
Pf3D7_10_v3_682363	NGS_SNP.Pf3D7_10_v3.682363	Pf3D7_10_v3	682363	PF3D7_1016900	early transcribed membrane protein 10.3	ETRAMP10.3	C (0.55)	T (0.45)	49	R	K	Has Non-Synonymous	0.0198683	0.0228027	0.135811	0.0378569			1		1	0.135811
Pf3D7_10_v3_862077	NGS_SNP.Pf3D7_10_v3.862077	Pf3D7_10_v3	862077	PF3D7_1021300	apicoplast integral membrane protein, putative		G (0.65)	C (0.35)	125	H	D	Has Non-Synonymous	0.00122366	0.0254852	0.154001	0.0486684			1	1	2	0.154001
Pf3D7_10_v3_1172712	NGS_SNP.Pf3D7_10_v3.1172712	Pf3D7_10_v3	1172712	PF3D7_1028500	partial CSTF domain-containing protein, putative		G (0.66)	A (0.34)	645	P	L	Has Non-Synonymous	0.00268176	0.00812666	0.000319767	0.0511208				1	1	0.0511208
Pf3D7_10_v3_1181683	NGS_SNP.Pf3D7_10_v3.1181683	Pf3D7_10_v3	1181683	PF3D7_1028700	merozoite TRAP-like protein	MTRAP	T (0.7)	C (0.3)	227	Y	H	Has Non-Synonymous	0.00277704	0.0981603	0.139988	0.00123478		1	1		2	0.139988
Pf3D7_10_v3_1326050	NGS_SNP.Pf3D7_10_v3.1326050	Pf3D7_10_v3	1326050	PF3D7_1033100	S-adenosylmethionine decarboxylase/ornithine decarboxylase	AdoMetDC/ODC	T (0.53)	C (0.47)	796	N	S	Has Non-Synonymous	0.0208291	0.0224917	0	0.0702914				1	1	0.0702914
Pf3D7_10_v3_1386094	NGS_SNP.Pf3D7_10_v3.1386094	Pf3D7_10_v3	1386094	PF3D7_1034900	methionine--tRNA ligase	MRScyt	A (0.67)	T (0.33)	882	D	V	Has Non-Synonymous	0.00628524	0.000824581	0.014644	0.0469859				1	1	0.0469859
Pf3D7_10_v3_1386107	NGS_SNP.Pf3D7_10_v3.1386107	Pf3D7_10_v3	1386107	PF3D7_1034900	methionine--tRNA ligase	MRScyt	T (0.61)	C (0.39)	886	L	N/A	Synonymous	0.00275906	0	0.0593608	0.0654291				1	1	0.0654291
Pf3D7_10_v3_1386913	NGS_SNP.Pf3D7_10_v3.1386913	Pf3D7_10_v3	1386913	PF3D7_1035000	U2 snRNA/tRNA pseudouridine synthase, putative		C (0.59)	T (0.41)	906	L	N/A	Synonymous	0.00227947	0	0.0626417	0.0932382				1	1	0.0932382
Pf3D7_11_v3_120959	NGS_SNP.Pf3D7_11_v3.120959	Pf3D7_11_v3	120959	PF3D7_1102500	gametocyte exported protein 2	GEXP02	C (0.79)	G (0.21)	110	E	Q	Has Non-Synonymous	0.00614801	0.0802403	0.0343979	0.00426988		1			1	0.0802403
Pf3D7_11_v3_410610	NGS_SNP.Pf3D7_11_v3.410610	Pf3D7_11_v3	410610	PF3D7_1110300	G-patch domain-containing protein, putative		T (0.5)	G (0.5)	86	I	N/A	Synonymous	0.0346697	0	0	0	1				1	0.0346697
Pf3D7_11_v3_410321	NGS_SNP.Pf3D7_11_v3.410321	Pf3D7_11_v3	410321	PF3D7_1110300	G-patch domain-containing protein, putative		T (0.64)	G (0.36)	183	K	Q	Has Non-Synonymous	0.0265079	0	0.0412321	0.0350593	1				1	0.0412321
Pf3D7_11_v3_449093	NGS_SNP.Pf3D7_11_v3.449093	Pf3D7_11_v3	449093	PF3D7_1111600	endonuclease/exonuclease/phosphatase family protein, putative		T (0.56)	A (0.44)	61	I	N	Has Non-Synonymous	0.000886562	0.0635839	0.130288	0.00648849			1		1	0.130288
Pf3D7_11_v3_526330	NGS_SNP.Pf3D7_11_v3.526330	Pf3D7_11_v3	526330	PF3D7_1113500	GTP-binding protein, putative		C (0.71)	T (0.29)	613	N	N/A	Synonymous	0.0120438	0	0.0919527	0.0809876			1	1	2	0.0919527
Pf3D7_11_v3_999375	NGS_SNP.Pf3D7_11_v3.999375	Pf3D7_11_v3	999375	PF3D7_1125400	mitochondrial import inner membrane translocase subunit TIM44, putative	TIM44	T (0.68)	C (0.32)	58	N	S	Has Non-Synonymous	0.00231992	0.192035	0.0987264	0.010059		1	1		2	0.192035
Pf3D7_11_v3_1543626	NGS_SNP.Pf3D7_11_v3.1543626	Pf3D7_11_v3	1543626	PF3D7_1138900	non-coding RNA		C (0.57)	A (0.43)	N/A	N/A	N/A	N/A	0.00749193	0	0.0266399	0.0604298				1	1	0.0604298
Pf3D7_11_v3_1552114	NGS_SNP.Pf3D7_11_v3.1552114	Pf3D7_11_v3	1552114	PF3D7_1139100	RNA-binding protein, putative		A (0.63)	C (0.37)	1310	Q	P	Has Non-Synonymous	0.0269345	0	0	0	1				1	0.0269345
Pf3D7_11_v3_1552115	NGS_SNP.Pf3D7_11_v3.1552115	Pf3D7_11_v3	1552115	PF3D7_1139100	RNA-binding protein, putative		G (0.62)	T (0.38)	1310	Q	P	Has Non-Synonymous	0.0269345	0	0	0	1				1	0.0269345
Pf3D7_11_v3_1557470	NGS_SNP.Pf3D7_11_v3.1557470	Pf3D7_11_v3	1557470	PF3D7_1139300	AP2 domain transcription factor AP2-G5	AP2-G5	C (0.5)	A (0.5)	2476	Q	H	Has Non-Synonymous	0.00081013	0.00636499	0	0.0452934				1	1	0.0452934
Pf3D7_11_v3_1640767	NGS_SNP.Pf3D7_11_v3.1640767	Pf3D7_11_v3	1640767	PF3D7_1140900	NdP1 protein, putative		T (0.66)	G (0.34)	724	N	H	Has Non-Synonymous	0.0241953	0.0709807	0.085616	0	1				1	0.085616
Pf3D7_11_v3_1749819	NGS_SNP.Pf3D7_11_v3.1749819	Pf3D7_11_v3	1749819	PF3D7_1143800	oocyst capsule protein Cap93, putative	CAP93	A (0.62)	G (0.38)	461	M	V	Has Non-Synonymous	0.00210245	0.0343727	0	0.05405				1	1	0.05405
Pf3D7_11_v3_1900435	NGS_SNP.Pf3D7_11_v3.1900435	Pf3D7_11_v3	1900435	PF3D7_1147800	membrane associated erythrocyte binding-like protein	MAEBL	T (0.56)	G (0.44)	344	T	N/A	Synonymous	0.0226405	0	0	0	1				1	0.0226405
Pf3D7_12_v3_386081	NGS_SNP.Pf3D7_12_v3.386081	Pf3D7_12_v3	386081	PF3D7_1208200	cysteine repeat modular protein 3	CRMP3	G (0.67)	A (0.33)	3135	R	K	Has Non-Synonymous	0.00270827	0	0.0584774	0.0962907				1	1	0.0962907
Pf3D7_12_v3_659938	NGS_SNP.Pf3D7_12_v3.659938	Pf3D7_12_v3	659938	PF3D7_1216600	cell traversal protein for ookinetes and sporozoites	CelTOS	C (0.77)	A (0.23)	117	V	F	Has Non-Synonymous	0.000627592	0.0768772	0.0567399	0		1			1	0.0768772
Pf3D7_12_v3_1184925	NGS_SNP.Pf3D7_12_v3.1184925	Pf3D7_12_v3	1184925	PF3D7_1228900	conserved protein, unknown function		A (0.54)	G (0.46)	127	C	N/A	Synonymous	0.0275106	0	0.0179609	0.0146285	1				1	0.0275106
Pf3D7_12_v3_1667498	NGS_SNP.Pf3D7_12_v3.1667498	Pf3D7_12_v3	1667498	PF3D7_1239800	conserved Plasmodium protein, unknown function		A (0.53)	G (0.47)	2350	N	D	Has Non-Synonymous	0.0253026	0.0470251	0.0581874	0	1				1	0.0581874
Pf3D7_12_v3_1661867	NGS_SNP.Pf3D7_12_v3.1661867	Pf3D7_12_v3	1661867	PF3D7_1239800	conserved Plasmodium protein, unknown function		T (0.58)	A (0.42)	473	L	I	Has Non-Synonymous	0.0217552	0	0.0241758	0.0327796	1				1	0.0327796
Pf3D7_12_v3_2039509	NGS_SNP.Pf3D7_12_v3.2039509	Pf3D7_12_v3	2039509	PF3D7_1249800	THO complex subunit 2, putative	THO2	A (0.54)	G (0.46)	115	L	S	Has Non-Synonymous	0.0182495	0.0915776	0.031364	0.00818682		1			1	0.0915776
Pf3D7_13_v3_92637	NGS_SNP.Pf3D7_13_v3.92637	Pf3D7_13_v3	92637	PF3D7_1301600	erythrocyte binding antigen-140	EBA140	T (0.6)	C (0.4)	239	N	S	Has Non-Synonymous	0.000449938	0.124013	0	0.117144		1		1	2	0.124013
Pf3D7_13_v3_92800	NGS_SNP.Pf3D7_13_v3.92800	Pf3D7_13_v3	92800	PF3D7_1301600	erythrocyte binding antigen-140	EBA140	T (0.61)	C (0.39)	185	I	V	Has Non-Synonymous	1.97e-05	0.0950947	0.00664528	0.0315375		1			1	0.0950947
Pf3D7_13_v3_192974	NGS_SNP.Pf3D7_13_v3.192974	Pf3D7_13_v3	192974	PF3D7_1303800	conserved Plasmodium protein, unknown function		A (0.52)	G (0.48)	6563	Y	H	Has Non-Synonymous	0	0.0197151	0	0.0458985				1	1	0.0458985
Pf3D7_13_v3_367468	NGS_SNP.Pf3D7_13_v3.367468	Pf3D7_13_v3	367468	PF3D7_1308200	carbamoyl phosphate synthetase	cpsSII	T (0.61)	A (0.39)	276	N	Y	Has Non-Synonymous	0.0222023	0	0	0	1				1	0.0222023
Pf3D7_13_v3_400162	NGS_SNP.Pf3D7_13_v3.400162	Pf3D7_13_v3	400162	PF3D7_1308600	conserved Plasmodium protein, unknown function		A (0.59)	C (0.41)	264	L	V	Has Non-Synonymous	0.0891602	0.0801942	0	0.0495786	1	1		1	3	0.0891602
Pf3D7_13_v3_472038	NGS_SNP.Pf3D7_13_v3.472038	Pf3D7_13_v3	472038	PF3D7_1310800	tetratricopeptide repeat protein, putative		C (0.68)	A (0.32)	989	V	L	Has Non-Synonymous	0.00780291	0.0158983	0.00589319	0.070138				1	1	0.070138
Pf3D7_13_v3_1026856	NGS_SNP.Pf3D7_13_v3.1026856	Pf3D7_13_v3	1026856	PF3D7_1324500	DEAD box helicase, putative		T (0.57)	G (0.43)	143	I	N/A	Synonymous	0.0152356	0.0524604	0.0892966	0			1		1	0.0892966
Pf3D7_13_v3_1419424	NGS_SNP.Pf3D7_13_v3.1419424	Pf3D7_13_v3	1419424	PF3D7_1335100	merozoite surface protein 7	MSP7	A (0.51)	G (0.49)	240	Y	H	Has Non-Synonymous	0.0120117	0	0.12783	0.0793408			1	1	2	0.12783
Pf3D7_13_v3_1419451	NGS_SNP.Pf3D7_13_v3.1419451	Pf3D7_13_v3	1419451	PF3D7_1335100	merozoite surface protein 7	MSP7	T (0.71)	C (0.29)	231	K	E	Has Non-Synonymous	0.00775681	0.0387179	0	0.0675573				1	1	0.0675573
Pf3D7_13_v3_1419415	NGS_SNP.Pf3D7_13_v3.1419415	Pf3D7_13_v3	1419415	PF3D7_1335100	merozoite surface protein 7	MSP7	T (0.63)	C (0.37)	243	K	E	Has Non-Synonymous	0.00562891	0.0022834	0.0174677	0.0708694				1	1	0.0708694
Pf3D7_13_v3_1419427	NGS_SNP.Pf3D7_13_v3.1419427	Pf3D7_13_v3	1419427	PF3D7_1335100	merozoite surface protein 7	MSP7	C (0.7)	T (0.3)	239	E	K	Has Non-Synonymous	0.00367219	0.0156895	0.00553878	0.0704921				1	1	0.0704921
Pf3D7_13_v3_1478081	NGS_SNP.Pf3D7_13_v3.1478081	Pf3D7_13_v3	1478081	PF3D7_1336400	RanBPM and CLTH-like protein, putative		A (0.64)	G (0.36)	243	S	N/A	Synonymous	0.0037761	0	0.110115	0.093708			1	1	2	0.110115
Pf3D7_13_v3_1569303	NGS_SNP.Pf3D7_13_v3.1569303	Pf3D7_13_v3	1569303	PF3D7_1338900	serine/threonine protein kinase, putative		T (0.6)	C (0.4)	623	K	E	Has Non-Synonymous	0.0222396	0	0	0	1				1	0.0222396
Pf3D7_13_v3_1970443	NGS_SNP.Pf3D7_13_v3.1970443	Pf3D7_13_v3	1970443	PF3D7_1349100	nucleoside diphosphate hydrolase, putative		G (0.53)	A (0.47)	104	L	N/A	Synonymous	0.00789521	0.0813131	0.00704266	0.0216093		1			1	0.0813131
Pf3D7_13_v3_1972169	NGS_SNP.Pf3D7_13_v3.1972169	Pf3D7_13_v3	1972169	PF3D7_1349200	glutamate--tRNA ligase, putative		T (0.55)	C (0.45)	771	V	N/A	Synonymous	0.0246792	0	0.064476	0.0490469	1			1	2	0.064476
Pf3D7_13_v3_2114518	NGS_SNP.Pf3D7_13_v3.2114518	Pf3D7_13_v3	2114518	PF3D7_1352900	Plasmodium exported protein, unknown function		T (0.52)	G (0.48)	463	K	T	Has Non-Synonymous	0	0	0.0656707	0.0489339				1	1	0.0656707
Pf3D7_13_v3_2124673	NGS_SNP.Pf3D7_13_v3.2124673	Pf3D7_13_v3	2124673	PF3D7_1353100	Plasmodium exported protein, unknown function		C (0.73)	T (0.27)	153	E	K	Has Non-Synonymous	0.00200139	0.0424908	0	0.0718914				1	1	0.0718914
Pf3D7_13_v3_2124676	NGS_SNP.Pf3D7_13_v3.2124676	Pf3D7_13_v3	2124676	PF3D7_1353100	Plasmodium exported protein, unknown function		C (0.69)	T (0.31)	152	E	K	Has Non-Synonymous	0.00138416	0.0338432	0	0.0507652				1	1	0.0507652
Pf3D7_13_v3_2415386	NGS_SNP.Pf3D7_13_v3.2415386	Pf3D7_13_v3	2415386	PF3D7_1360500	guanylyl cyclase beta	GCbeta	C (0.59)	A (0.41)	387	S	Y	Has Non-Synonymous	0.0217433	0.0618751	0	0.0262614	1				1	0.0618751
Pf3D7_14_v3_371725	NGS_SNP.Pf3D7_14_v3.371725	Pf3D7_14_v3	371725	PF3D7_1409500	conserved Plasmodium protein, unknown function		G (0.62)	A (0.38)	449	K	N/A	Synonymous	0	0.0188897	0	0.0536708				1	1	0.0536708
Pf3D7_14_v3_421792	NGS_SNP.Pf3D7_14_v3.421792	Pf3D7_14_v3	421792	PF3D7_1410400	rhoptry-associated protein 1	RAP1	C (0.59)	G (0.41)	451	H	D	Has Non-Synonymous	0	0.00812035	0.119571	0.0477093			1	1	2	0.119571
Pf3D7_14_v3_1553266	NGS_SNP.Pf3D7_14_v3.1553266	Pf3D7_14_v3	1553266	PF3D7_1438400	metacaspase-2	MCA2	G (0.75)	A (0.25)	1085	D	N	Has Non-Synonymous	0.000683701	0.0629624	0.154183	0.0170066			1		1	0.154183
Pf3D7_14_v3_2185421	NGS_SNP.Pf3D7_14_v3.2185421	Pf3D7_14_v3	2185421	PF3D7_1453200	conserved Plasmodium protein, unknown function		G (0.59)	T (0.41)	1231	M	I	Has Non-Synonymous	0.0140655	0.0215292	0	0.0617348				1	1	0.0617348
Pf3D7_14_v3_2671772	NGS_SNP.Pf3D7_14_v3.2671772	Pf3D7_14_v3	2671772	PF3D7_1465800	dynein beta chain, putative		G (0.6)	T (0.4)	2925	G	C	Has Non-Synonymous	0	0.0776857	0.0396618	0		1			1	0.0776857
Pf3D7_14_v3_3189430	NGS_SNP.Pf3D7_14_v3.3189430	Pf3D7_14_v3	3189430	PF3D7_1477500	Plasmodium exported protein (PHISTb), unknown function		G (0.59)	A (0.41)	129	E	K	Has Non-Synonymous	0.0051614	0	0	0.0453402				1	1	0.0453402

## Sheet: Table_S5_topIHS_geotemp
SNP Id	Location (SNP)	Gene ID	Location (Gene)	Product Description	Gene Name or Symbol	SNP Type	Position in protein	Major Allele	Major Product	Minor Allele	Minor Product	Reference Allele
NGS_SNP.Pf3D7_01_v3.180056	Pf3D7_01_v3: 180,056	PF3D7_0104100	Pf3D7_01_v3:177,187..181,825(+)	protein E140, putative	N/A	Has Non-Synonymous	548	A (0.84)	I	T	L	A
NGS_SNP.Pf3D7_01_v3.180068	Pf3D7_01_v3: 180,068	PF3D7_0104100	Pf3D7_01_v3:177,187..181,825(+)	protein E140, putative	N/A	Has Non-Synonymous	552	C (0.79)	Q	G	G	C
NGS_SNP.Pf3D7_01_v3.180185	Pf3D7_01_v3: 180,185	PF3D7_0104100	Pf3D7_01_v3:177,187..181,825(+)	protein E140, putative	N/A	Has Non-Synonymous	591	G (0.7)	G	A	R	G
NGS_SNP.Pf3D7_01_v3.180192	Pf3D7_01_v3: 180,192	PF3D7_0104100	Pf3D7_01_v3:177,187..181,825(+)	protein E140, putative	N/A	Has Non-Synonymous	593	A (0.59)	N	T	I	A
NGS_SNP.Pf3D7_01_v3.180216	Pf3D7_01_v3: 180,216	PF3D7_0104100	Pf3D7_01_v3:177,187..181,825(+)	protein E140, putative	N/A	Has Non-Synonymous	601	T (0.95)	I	A	N	T
NGS_SNP.Pf3D7_01_v3.180233	Pf3D7_01_v3: 180,233	PF3D7_0104100	Pf3D7_01_v3:177,187..181,825(+)	protein E140, putative	N/A	Has Non-Synonymous	607	A (0.68)	N	G	D	A
NGS_SNP.Pf3D7_01_v3.180288	Pf3D7_01_v3: 180,288	PF3D7_0104100	Pf3D7_01_v3:177,187..181,825(+)	protein E140, putative	N/A	Has Non-Synonymous	625	C (0.58)	T	A	N	A
NGS_SNP.Pf3D7_01_v3.180293	Pf3D7_01_v3: 180,293	PF3D7_0104100	Pf3D7_01_v3:177,187..181,825(+)	protein E140, putative	N/A	Has Non-Synonymous	627	C (0.96)	R	T	C	C
NGS_SNP.Pf3D7_01_v3.180297	Pf3D7_01_v3: 180,297	PF3D7_0104100	Pf3D7_01_v3:177,187..181,825(+)	protein E140, putative	N/A	Has Non-Synonymous	628	A (0.58)	D	G	G	A
NGS_SNP.Pf3D7_01_v3.180299	Pf3D7_01_v3: 180,299	PF3D7_0104100	Pf3D7_01_v3:177,187..181,825(+)	protein E140, putative	N/A	Has Non-Synonymous	629	C (0.57)	R	G	G	G
NGS_SNP.Pf3D7_01_v3.180311	Pf3D7_01_v3: 180,311	PF3D7_0104100	Pf3D7_01_v3:177,187..181,825(+)	protein E140, putative	N/A	Has Non-Synonymous	633	A (0.51)	H	C	N	C
NGS_SNP.Pf3D7_01_v3.495994	Pf3D7_01_v3: 495,994	PF3D7_0113100	Pf3D7_01_v3:494,941..500,347(+)	surface-associated interspersed protein 1.1 (SURFIN 1.1)	SURF1.1	Has Non-Synonymous	251	C (0.65)	Q	G	E	G
NGS_SNP.Pf3D7_01_v3.536091	Pf3D7_01_v3: 536,091	PF3D7_0113800	Pf3D7_01_v3:526,530..536,562(+)	DBL containing protein, unknown function	N/A	Has Non-Synonymous	2815	A (0.84)	T	G	A	A
NGS_SNP.Pf3D7_01_v3.536113	Pf3D7_01_v3: 536,113	PF3D7_0113800	Pf3D7_01_v3:526,530..536,562(+)	DBL containing protein, unknown function	N/A	Has Non-Synonymous	2822	A (0.76)	E	G	G	G
NGS_SNP.Pf3D7_02_v3.842699	Pf3D7_02_v3: 842,699	PF3D7_0220800	Pf3D7_02_v3:838,594..844,668(+)	cytoadherence linked asexual protein 2	CLAG2	Has Non-Synonymous	969	A (0.92)	N	G	S	A
NGS_SNP.Pf3D7_03_v3.142944	Pf3D7_03_v3: 142,944	PF3D7_0302600	Pf3D7_03_v3:141,335..146,155(+)	ABC transporter B family member 4, putative	ABCB4	Synonymous	463	T (0.77)	S	G	N/A	G
NGS_SNP.Pf3D7_04_v3.1035352	Pf3D7_04_v3: 1,035,352	PF3D7_0422500	Pf3D7_04_v3:1,029,062..1,038,336(+)	pre-mRNA-splicing helicase BRR2, putative	BRR2	Synonymous	2008	A (0.93)	Q	G	N/A	A
NGS_SNP.Pf3D7_04_v3.529482	Pf3D7_04_v3: 529,482	PF3D7_0411900	Pf3D7_04_v3:527,408..535,614(-)	DNA polymerase alpha catalytic subunit A	N/A	Synonymous	1483	T (0.91)	K	C	N/A	T
NGS_SNP.Pf3D7_04_v3.544537	Pf3D7_04_v3: 544,537	PF3D7_0412300	Pf3D7_04_v3:543,378..545,746(+)	phosphopantothenoylcysteine synthetase, putative	N/A	Has Non-Synonymous	305	A (0.81)	N	G	D	A
NGS_SNP.Pf3D7_04_v3.544615	Pf3D7_04_v3: 544,615	PF3D7_0412300	Pf3D7_04_v3:543,378..545,746(+)	phosphopantothenoylcysteine synthetase, putative	N/A	Has Non-Synonymous	331	A (0.75)	I	C	L	A
NGS_SNP.Pf3D7_04_v3.628470	Pf3D7_04_v3: 628,470	PF3D7_0414000	Pf3D7_04_v3:626,435..633,382(-)	structural maintenance of chromosomes protein 3	SMC3	Synonymous	986	T (0.91)	K	C	N/A	T
NGS_SNP.Pf3D7_04_v3.630392	Pf3D7_04_v3: 630,392	PF3D7_0414000	Pf3D7_04_v3:626,435..633,382(-)	structural maintenance of chromosomes protein 3	SMC3	Has Non-Synonymous	642	A (0.84)	D	T	E	A
NGS_SNP.Pf3D7_04_v3.637010	Pf3D7_04_v3: 637,010	PF3D7_0414100	Pf3D7_04_v3:633,501..639,156(-)	conserved Plasmodium membrane protein, unknown function	N/A	Has Non-Synonymous	632	A (0.81)	F	C	L	A
NGS_SNP.Pf3D7_04_v3.764832	Pf3D7_04_v3: 764,832	PF3D7_0417400	Pf3D7_04_v3:755,176..777,060(+)	conserved Plasmodium protein, unknown function	N/A	Has Non-Synonymous	2847	G (0.89)	G	A	R	G
NGS_SNP.Pf3D7_04_v3.797215	Pf3D7_04_v3: 797,215	PF3D7_0418000	Pf3D7_04_v3:793,749..810,923(+)	conserved Plasmodium protein, unknown function	N/A	Has Non-Synonymous	1064	C (0.99)	N	T	S	C
NGS_SNP.Pf3D7_04_v3.929474	Pf3D7_04_v3: 929,474	PF3D7_0420400	Pf3D7_04_v3:929,219..930,280(+)	ribosome-recycling factor	RRF2	Synonymous	45	G (0.97)	K	A	N/A	G
NGS_SNP.Pf3D7_04_v3.989342	Pf3D7_04_v3: 989,342	PF3D7_0421700	Pf3D7_04_v3:987,842..994,360(-)	conserved Plasmodium protein, unknown function	N/A	Synonymous	1673	T (0.85)	K	C	N/A	C
NGS_SNP.Pf3D7_04_v3.989363	Pf3D7_04_v3: 989,363	PF3D7_0421700	Pf3D7_04_v3:987,842..994,360(-)	conserved Plasmodium protein, unknown function	N/A	Has Non-Synonymous	1666	C (0.88)	Q	A	H	C
NGS_SNP.Pf3D7_04_v3.989390	Pf3D7_04_v3: 989,390	PF3D7_0421700	Pf3D7_04_v3:987,842..994,360(-)	conserved Plasmodium protein, unknown function	N/A	Synonymous	1657	T (0.88)	Q	C	N/A	T
NGS_SNP.Pf3D7_04_v3.989663	Pf3D7_04_v3: 989,663	PF3D7_0421700	Pf3D7_04_v3:987,842..994,360(-)	conserved Plasmodium protein, unknown function	N/A	Synonymous	1566	G (0.83)	L	A	N/A	G
NGS_SNP.Pf3D7_04_v3.989906	Pf3D7_04_v3: 989,906	PF3D7_0421700	Pf3D7_04_v3:987,842..994,360(-)	conserved Plasmodium protein, unknown function	N/A	Synonymous	1485	A (0.78)	N	G	N/A	A
NGS_SNP.Pf3D7_04_v3.990088	Pf3D7_04_v3: 990,088	PF3D7_0421700	Pf3D7_04_v3:987,842..994,360(-)	conserved Plasmodium protein, unknown function	N/A	Has Non-Synonymous	1425	T (0.78)	N	C	D	T
NGS_SNP.Pf3D7_04_v3.990103	Pf3D7_04_v3: 990,103	PF3D7_0421700	Pf3D7_04_v3:987,842..994,360(-)	conserved Plasmodium protein, unknown function	N/A	Has Non-Synonymous	1420	T (0.77)	I	C	V	T
NGS_SNP.Pf3D7_04_v3.990152	Pf3D7_04_v3: 990,152	PF3D7_0421700	Pf3D7_04_v3:987,842..994,360(-)	conserved Plasmodium protein, unknown function	N/A	Synonymous	1403	G (0.78)	D	A	N/A	G
NGS_SNP.Pf3D7_04_v3.990269	Pf3D7_04_v3: 990,269	PF3D7_0421700	Pf3D7_04_v3:987,842..994,360(-)	conserved Plasmodium protein, unknown function	N/A	Synonymous	1364	A (0.66)	D	G	N/A	A
NGS_SNP.Pf3D7_04_v3.990877	Pf3D7_04_v3: 990,877	PF3D7_0421700	Pf3D7_04_v3:987,842..994,360(-)	conserved Plasmodium protein, unknown function	N/A	Has Non-Synonymous	1162	C (0.87)	V	T	I	C
NGS_SNP.Pf3D7_04_v3.991328	Pf3D7_04_v3: 991,328	PF3D7_0421700	Pf3D7_04_v3:987,842..994,360(-)	conserved Plasmodium protein, unknown function	N/A	Synonymous	1011	A (0.76)	N	G	N/A	A
NGS_SNP.Pf3D7_04_v3.992159	Pf3D7_04_v3: 992,159	PF3D7_0421700	Pf3D7_04_v3:987,842..994,360(-)	conserved Plasmodium protein, unknown function	N/A	Has Non-Synonymous	734	C (0.99)	M	T	I	C
NGS_SNP.Pf3D7_05_v3.476993	Pf3D7_05_v3: 476,993	PF3D7_0511300	Pf3D7_05_v3:474,407..478,999(-)	MORN repeat protein, putative	N/A	Has Non-Synonymous	583	C (0.86)	R	T	K	C
NGS_SNP.Pf3D7_06_v3.1027157	Pf3D7_06_v3: 1,027,157	PF3D7_0625300	Pf3D7_06_v3:1,026,468..1,031,411(-)	mitochondrial DNA polymerase	MtDNAP	Has Non-Synonymous	1334	T (0.96)	D	C	G	T
NGS_SNP.Pf3D7_06_v3.1110981	Pf3D7_06_v3: 1,110,981	PF3D7_0627700	Pf3D7_06_v3:1,105,837..1,113,416(+)	transportin	N/A	Has Non-Synonymous	929	A (0.79)	N	G	D	A
NGS_SNP.Pf3D7_06_v3.1114564	Pf3D7_06_v3: 1,114,564	PF3D7_0627800	Pf3D7_06_v3:1,113,448..1,117,623(-)	acetyl-CoA synthetase	ACAS	Has Non-Synonymous	992	G (0.78)	H	C	D	G
NGS_SNP.Pf3D7_06_v3.1114928	Pf3D7_06_v3: 1,114,928	PF3D7_0627800	Pf3D7_06_v3:1,113,448..1,117,623(-)	acetyl-CoA synthetase	ACAS	Synonymous	870	A (0.77)	G	G	N/A	A
NGS_SNP.Pf3D7_06_v3.1114951	Pf3D7_06_v3: 1,114,951	PF3D7_0627800	Pf3D7_06_v3:1,113,448..1,117,623(-)	acetyl-CoA synthetase	ACAS	Has Non-Synonymous	863	C (0.78)	D	T	N	C
NGS_SNP.Pf3D7_06_v3.1115372	Pf3D7_06_v3: 1,115,372	PF3D7_0627800	Pf3D7_06_v3:1,113,448..1,117,623(-)	acetyl-CoA synthetase	ACAS	Synonymous	722	G (0.86)	F	A	N/A	G
NGS_SNP.Pf3D7_06_v3.825857	Pf3D7_06_v3: 825,857	PF3D7_0619600	Pf3D7_06_v3:824,758..828,098(+)	conserved Plasmodium protein, unknown function	N/A	Has Non-Synonymous	234	A (0.96)	H	T	L	A
NGS_SNP.Pf3D7_07_v3.125921	Pf3D7_07_v3: 125,921	PF3D7_0703200	Pf3D7_07_v3:122,013..127,441(-)	conserved Plasmodium protein, unknown function	N/A	Synonymous	405	T (0.97)	P	A	N/A	T
NGS_SNP.Pf3D7_07_v3.158307	Pf3D7_07_v3: 158,307	PF3D7_0703900	Pf3D7_07_v3:153,119..167,024(-)	conserved Plasmodium membrane protein, unknown function	N/A	Has Non-Synonymous	2697	G (1)	A	A	V	G
NGS_SNP.Pf3D7_07_v3.257953	Pf3D7_07_v3: 257,953	PF3D7_0705200	Pf3D7_07_v3:255,871..260,931(+)	conserved Plasmodium protein, unknown function	N/A	Has Non-Synonymous	623	G (0.83)	C	C	S	G
NGS_SNP.Pf3D7_07_v3.415529	Pf3D7_07_v3: 415,529	PF3D7_0709300	Pf3D7_07_v3:413,560..422,436(-)	mediator of RNA polymerase II transcription subunit 14, putative	MED14	Has Non-Synonymous	2074	G (0.75)	P	T	H	T
NGS_SNP.Pf3D7_07_v3.415543	Pf3D7_07_v3: 415,543	PF3D7_0709300	Pf3D7_07_v3:413,560..422,436(-)	mediator of RNA polymerase II transcription subunit 14, putative	MED14	Has Non-Synonymous	2069	G (0.63)	H	T	Q	T
NGS_SNP.Pf3D7_07_v3.415625	Pf3D7_07_v3: 415,625	PF3D7_0709300	Pf3D7_07_v3:413,560..422,436(-)	mediator of RNA polymerase II transcription subunit 14, putative	MED14	Has Non-Synonymous	2042	C (0.76)	G	A	V	A
NGS_SNP.Pf3D7_07_v3.416615	Pf3D7_07_v3: 416,615	PF3D7_0709300	Pf3D7_07_v3:413,560..422,436(-)	mediator of RNA polymerase II transcription subunit 14, putative	MED14	Has Non-Synonymous	1712	T (0.8)	H	A	L	T
NGS_SNP.Pf3D7_07_v3.417360	Pf3D7_07_v3: 417,360	PF3D7_0709300	Pf3D7_07_v3:413,560..422,436(-)	mediator of RNA polymerase II transcription subunit 14, putative	MED14	Has Non-Synonymous	1464	C (0.74)	V	A	F	C
NGS_SNP.Pf3D7_07_v3.417622	Pf3D7_07_v3: 417,622	PF3D7_0709300	Pf3D7_07_v3:413,560..422,436(-)	mediator of RNA polymerase II transcription subunit 14, putative	MED14	Synonymous	1376	T (0.91)	T	C	N/A	T
NGS_SNP.Pf3D7_07_v3.417661	Pf3D7_07_v3: 417,661	PF3D7_0709300	Pf3D7_07_v3:413,560..422,436(-)	mediator of RNA polymerase II transcription subunit 14, putative	MED14	Has Non-Synonymous	1363	G (0.89)	D	T	E	G
NGS_SNP.Pf3D7_07_v3.417700	Pf3D7_07_v3: 417,700	PF3D7_0709300	Pf3D7_07_v3:413,560..422,436(-)	mediator of RNA polymerase II transcription subunit 14, putative	MED14	Has Non-Synonymous	1350	T (0.88)	I	C	M	C
NGS_SNP.Pf3D7_07_v3.418720	Pf3D7_07_v3: 418,720	PF3D7_0709300	Pf3D7_07_v3:413,560..422,436(-)	mediator of RNA polymerase II transcription subunit 14, putative	MED14	Synonymous	1010	A (0.72)	Y	G	N/A	A
NGS_SNP.Pf3D7_07_v3.418726	Pf3D7_07_v3: 418,726	PF3D7_0709300	Pf3D7_07_v3:413,560..422,436(-)	mediator of RNA polymerase II transcription subunit 14, putative	MED14	Synonymous	1008	T (0.72)	T	G	N/A	T
NGS_SNP.Pf3D7_07_v3.418830	Pf3D7_07_v3: 418,830	PF3D7_0709300	Pf3D7_07_v3:413,560..422,436(-)	mediator of RNA polymerase II transcription subunit 14, putative	MED14	Has Non-Synonymous	974	C (0.88)	D	T	N	C
NGS_SNP.Pf3D7_07_v3.419410	Pf3D7_07_v3: 419,410	PF3D7_0709300	Pf3D7_07_v3:413,560..422,436(-)	mediator of RNA polymerase II transcription subunit 14, putative	MED14	Synonymous	780	A (0.69)	H	G	N/A	G
NGS_SNP.Pf3D7_07_v3.419413	Pf3D7_07_v3: 419,413	PF3D7_0709300	Pf3D7_07_v3:413,560..422,436(-)	mediator of RNA polymerase II transcription subunit 14, putative	MED14	Synonymous	779	G (0.7)	C	A	N/A	A
NGS_SNP.Pf3D7_07_v3.419603	Pf3D7_07_v3: 419,603	PF3D7_0709300	Pf3D7_07_v3:413,560..422,436(-)	mediator of RNA polymerase II transcription subunit 14, putative	MED14	Has Non-Synonymous	716	A (0.67)	F	T	Y	T
NGS_SNP.Pf3D7_07_v3.420908	Pf3D7_07_v3: 420,908	PF3D7_0709300	Pf3D7_07_v3:413,560..422,436(-)	mediator of RNA polymerase II transcription subunit 14, putative	MED14	Has Non-Synonymous	281	C (0.52)	G	G	A	C
NGS_SNP.Pf3D7_07_v3.426753	Pf3D7_07_v3: 426,753	PF3D7_0709400	Pf3D7_07_v3:422,674..427,278(-)	Cg7 protein	N/A	Has Non-Synonymous	161	A (0.57)	V	T	E	A
NGS_SNP.Pf3D7_07_v3.430364	Pf3D7_07_v3: 430,364	PF3D7_0709600	Pf3D7_07_v3:429,537..433,997(-)	ribonucleases P/MRP protein subunit POP1, putative	POP1	Synonymous	1073	T (0.58)	G	G	N/A	T
NGS_SNP.Pf3D7_07_v3.431252	Pf3D7_07_v3: 431,252	PF3D7_0709600	Pf3D7_07_v3:429,537..433,997(-)	ribonucleases P/MRP protein subunit POP1, putative	POP1	Has Non-Synonymous	836	C (0.83)	C	T	Y	C
NGS_SNP.Pf3D7_07_v3.432784	Pf3D7_07_v3: 432,784	PF3D7_0709600	Pf3D7_07_v3:429,537..433,997(-)	ribonucleases P/MRP protein subunit POP1, putative	POP1	Has Non-Synonymous	325	A (0.58)	N	T	K	T
NGS_SNP.Pf3D7_07_v3.449790	Pf3D7_07_v3: 449,790	PF3D7_0710000	Pf3D7_07_v3:447,209..458,876(-)	conserved Plasmodium protein, unknown function	N/A	Has Non-Synonymous	2510	T (0.59)	D	A	V	T
NGS_SNP.Pf3D7_07_v3.450016	Pf3D7_07_v3: 450,016	PF3D7_0710000	Pf3D7_07_v3:447,209..458,876(-)	conserved Plasmodium protein, unknown function	N/A	Has Non-Synonymous	2435	A (0.52)	Y	G	H	A
NGS_SNP.Pf3D7_07_v3.450032	Pf3D7_07_v3: 450,032	PF3D7_0710000	Pf3D7_07_v3:447,209..458,876(-)	conserved Plasmodium protein, unknown function	N/A	Synonymous	2429	A (0.52)	D	G	N/A	A
NGS_SNP.Pf3D7_07_v3.450424	Pf3D7_07_v3: 450,424	PF3D7_0710000	Pf3D7_07_v3:447,209..458,876(-)	conserved Plasmodium protein, unknown function	N/A	Has Non-Synonymous	2299	T (0.53)	N	G	H	G
NGS_SNP.Pf3D7_07_v3.450711	Pf3D7_07_v3: 450,711	PF3D7_0710000	Pf3D7_07_v3:447,209..458,876(-)	conserved Plasmodium protein, unknown function	N/A	Has Non-Synonymous	2203	T (0.79)	K	G	T	T
NGS_SNP.Pf3D7_07_v3.450968	Pf3D7_07_v3: 450,968	PF3D7_0710000	Pf3D7_07_v3:447,209..458,876(-)	conserved Plasmodium protein, unknown function	N/A	Synonymous	2117	T (0.74)	T	C	N/A	T
NGS_SNP.Pf3D7_07_v3.452251	Pf3D7_07_v3: 452,251	PF3D7_0710000	Pf3D7_07_v3:447,209..458,876(-)	conserved Plasmodium protein, unknown function	N/A	Has Non-Synonymous	1690	C (0.92)	V	T	I	C
NGS_SNP.Pf3D7_07_v3.454026	Pf3D7_07_v3: 454,026	PF3D7_0710000	Pf3D7_07_v3:447,209..458,876(-)	conserved Plasmodium protein, unknown function	N/A	Has Non-Synonymous	1248	C (0.9)	S	T	N	C
NGS_SNP.Pf3D7_07_v3.456532	Pf3D7_07_v3: 456,532	PF3D7_0710000	Pf3D7_07_v3:447,209..458,876(-)	conserved Plasmodium protein, unknown function	N/A	Has Non-Synonymous	655	T (0.89)	Q	G	H	T
NGS_SNP.Pf3D7_07_v3.460942	Pf3D7_07_v3: 460,942	PF3D7_0710100	Pf3D7_07_v3:459,688..461,959(+)	conserved protein, unknown function	N/A	Has Non-Synonymous	296	C (0.89)	Q	A	K	C
NGS_SNP.Pf3D7_07_v3.465508	Pf3D7_07_v3: 465,508	PF3D7_0710200	Pf3D7_07_v3:462,183..472,293(+)	conserved Plasmodium protein, unknown function	N/A	Has Non-Synonymous	802	A (0.9)	I	G	V	A
NGS_SNP.Pf3D7_07_v3.471807	Pf3D7_07_v3: 471,807	PF3D7_0710200	Pf3D7_07_v3:462,183..472,293(+)	conserved Plasmodium protein, unknown function	N/A	Has Non-Synonymous	2901	G (0.97)	Q	T	H	G
NGS_SNP.Pf3D7_07_v3.487614	Pf3D7_07_v3: 487,614	PF3D7_0711000	Pf3D7_07_v3:486,497..491,719(-)	AAA family ATPase, CDC48 subfamily	CDC48	Synonymous	1119	A (0.98)	T	T	N/A	A
NGS_SNP.Pf3D7_07_v3.487758	Pf3D7_07_v3: 487,758	PF3D7_0711000	Pf3D7_07_v3:486,497..491,719(-)	AAA family ATPase, CDC48 subfamily	CDC48	Synonymous	1071	T (0.95)	T	G	N/A	T
NGS_SNP.Pf3D7_07_v3.497403	Pf3D7_07_v3: 497,403	PF3D7_0711200	Pf3D7_07_v3:494,948..498,596(+)	conserved Plasmodium protein, unknown function	N/A	Has Non-Synonymous	722	T (0.93)	H	A	E	T
NGS_SNP.Pf3D7_07_v3.502586	Pf3D7_07_v3: 502,586	PF3D7_0711400	Pf3D7_07_v3:500,019..503,352(-)	histone deacetylase complex subunit SAP18, putative	SAP18	Has Non-Synonymous	3	T (0.87)	R	A	S	T
NGS_SNP.Pf3D7_07_v3.505802	Pf3D7_07_v3: 505,802	PF3D7_0711500	Pf3D7_07_v3:504,540..507,864(+)	regulator of chromosome condensation, putative	N/A	Synonymous	186	G (0.54)	K	A	N/A	G
NGS_SNP.Pf3D7_07_v3.505865	Pf3D7_07_v3: 505,865	PF3D7_0711500	Pf3D7_07_v3:504,540..507,864(+)	regulator of chromosome condensation, putative	N/A	Synonymous	207	A (0.86)	E	G	N/A	G
NGS_SNP.Pf3D7_07_v3.506013	Pf3D7_07_v3: 506,013	PF3D7_0711500	Pf3D7_07_v3:504,540..507,864(+)	regulator of chromosome condensation, putative	N/A	Has Non-Synonymous	257	A (0.91)	T	G	A	A
NGS_SNP.Pf3D7_07_v3.506353	Pf3D7_07_v3: 506,353	PF3D7_0711500	Pf3D7_07_v3:504,540..507,864(+)	regulator of chromosome condensation, putative	N/A	Has Non-Synonymous	370	C (0.78)	T	T	I	C
NGS_SNP.Pf3D7_07_v3.506750	Pf3D7_07_v3: 506,750	PF3D7_0711500	Pf3D7_07_v3:504,540..507,864(+)	regulator of chromosome condensation, putative	N/A	Has Non-Synonymous	502	A (0.72)	R	T	S	A
NGS_SNP.Pf3D7_07_v3.507044	Pf3D7_07_v3: 507,044	PF3D7_0711500	Pf3D7_07_v3:504,540..507,864(+)	regulator of chromosome condensation, putative	N/A	Synonymous	600	T (0.98)	S	C	N/A	T
NGS_SNP.Pf3D7_07_v3.507128	Pf3D7_07_v3: 507,128	PF3D7_0711500	Pf3D7_07_v3:504,540..507,864(+)	regulator of chromosome condensation, putative	N/A	Synonymous	628	C (0.68)	Y	T	N/A	C
NGS_SNP.Pf3D7_07_v3.606241	Pf3D7_07_v3: 606,241	PF3D7_0713100	Pf3D7_07_v3:605,369..606,780(+)	Pfmc-2TM Maurer's cleft two transmembrane protein	MC-2TM	Has Non-Synonymous	166	T (0.86)	V	C	A	T
NGS_SNP.Pf3D7_07_v3.606245	Pf3D7_07_v3: 606,245	PF3D7_0713100	Pf3D7_07_v3:605,369..606,780(+)	Pfmc-2TM Maurer's cleft two transmembrane protein	MC-2TM	Has Non-Synonymous	167	A (0.9)	I	G	M	A
NGS_SNP.Pf3D7_07_v3.606394	Pf3D7_07_v3: 606,394	PF3D7_0713100	Pf3D7_07_v3:605,369..606,780(+)	Pfmc-2TM Maurer's cleft two transmembrane protein	MC-2TM	Has Non-Synonymous	217	A (0.96)	K	G	E	A
NGS_SNP.Pf3D7_07_v3.607238	Pf3D7_07_v3: 607,238	PF3D7_0713200	Pf3D7_07_v3:606,547..608,612(-)	exported protein family 1	EPF1	Has Non-Synonymous	183	G (0.87)	S	A	L	G
NGS_SNP.Pf3D7_07_v3.607520	Pf3D7_07_v3: 607,520	PF3D7_0713200	Pf3D7_07_v3:606,547..608,612(-)	exported protein family 1	EPF1	Has Non-Synonymous	89	G (0.89)	S	A	F	G
NGS_SNP.Pf3D7_07_v3.613104	Pf3D7_07_v3: 613,104	PF3D7_0713400	Pf3D7_07_v3:612,059..613,810(+)	GPCR-like receptor SR25	SR25	Synonymous	146	A (0.93)	I	T	N/A	A
NGS_SNP.Pf3D7_07_v3.614408	Pf3D7_07_v3: 614,408	PF3D7_0713500	Pf3D7_07_v3:613,821..617,804(+)	conserved Plasmodium protein, unknown function	N/A	Has Non-Synonymous	8	T (0.67)	D	A	E	A
NGS_SNP.Pf3D7_07_v3.614420	Pf3D7_07_v3: 614,420	PF3D7_0713500	Pf3D7_07_v3:613,821..617,804(+)	conserved Plasmodium protein, unknown function	N/A	Synonymous	12	C (0.71)	C	T	N/A	C
NGS_SNP.Pf3D7_07_v3.614772	Pf3D7_07_v3: 614,772	PF3D7_0713500	Pf3D7_07_v3:613,821..617,804(+)	conserved Plasmodium protein, unknown function	N/A	Has Non-Synonymous	130	A (0.68)	M	G	V	A
NGS_SNP.Pf3D7_07_v3.614879	Pf3D7_07_v3: 614,879	PF3D7_0713500	Pf3D7_07_v3:613,821..617,804(+)	conserved Plasmodium protein, unknown function	N/A	Has Non-Synonymous	165	G (0.74)	K	T	N	G
NGS_SNP.Pf3D7_07_v3.614894	Pf3D7_07_v3: 614,894	PF3D7_0713500	Pf3D7_07_v3:613,821..617,804(+)	conserved Plasmodium protein, unknown function	N/A	Has Non-Synonymous	170	A (0.89)	I	G	M	A
NGS_SNP.Pf3D7_07_v3.614929	Pf3D7_07_v3: 614,929	PF3D7_0713500	Pf3D7_07_v3:613,821..617,804(+)	conserved Plasmodium protein, unknown function	N/A	Has Non-Synonymous	182	G (0.89)	G	A	D	G
NGS_SNP.Pf3D7_07_v3.614985	Pf3D7_07_v3: 614,985	PF3D7_0713500	Pf3D7_07_v3:613,821..617,804(+)	conserved Plasmodium protein, unknown function	N/A	Has Non-Synonymous	201	A (0.89)	N	T	Y	A
NGS_SNP.Pf3D7_07_v3.614996	Pf3D7_07_v3: 614,996	PF3D7_0713500	Pf3D7_07_v3:613,821..617,804(+)	conserved Plasmodium protein, unknown function	N/A	Has Non-Synonymous	204	G (0.84)	M	A	I	G
NGS_SNP.Pf3D7_07_v3.615003	Pf3D7_07_v3: 615,003	PF3D7_0713500	Pf3D7_07_v3:613,821..617,804(+)	conserved Plasmodium protein, unknown function	N/A	Has Non-Synonymous	207	T (0.88)	S	G	D	T
NGS_SNP.Pf3D7_07_v3.615728	Pf3D7_07_v3: 615,728	PF3D7_0713500	Pf3D7_07_v3:613,821..617,804(+)	conserved Plasmodium protein, unknown function	N/A	Synonymous	448	T (0.96)	N	C	N/A	T
NGS_SNP.Pf3D7_07_v3.615948	Pf3D7_07_v3: 615,948	PF3D7_0713500	Pf3D7_07_v3:613,821..617,804(+)	conserved Plasmodium protein, unknown function	N/A	Has Non-Synonymous	522	C (0.71)	H	T	Y	C
NGS_SNP.Pf3D7_07_v3.616570	Pf3D7_07_v3: 616,570	PF3D7_0713500	Pf3D7_07_v3:613,821..617,804(+)	conserved Plasmodium protein, unknown function	N/A	Has Non-Synonymous	729	C (0.94)	S	T	L	C
NGS_SNP.Pf3D7_07_v3.618042	Pf3D7_07_v3: 618,042	PF3D7_0713600	Pf3D7_07_v3:617,889..621,078(+)	ribosomal protein S5, mitochondrial, putative	N/A	Has Non-Synonymous	37	A (0.73)	N	G	S	A
NGS_SNP.Pf3D7_07_v3.619360	Pf3D7_07_v3: 619,360	PF3D7_0713600	Pf3D7_07_v3:617,889..621,078(+)	ribosomal protein S5, mitochondrial, putative	N/A	Synonymous	476	T (0.92)	N	C	N/A	C
NGS_SNP.Pf3D7_07_v3.627436	Pf3D7_07_v3: 627,436	PF3D7_0713900	Pf3D7_07_v3:626,391..641,230(-)	conserved Plasmodium protein, unknown function	N/A	Has Non-Synonymous	3447	T (0.76)	I	C	M	T
NGS_SNP.Pf3D7_07_v3.628346	Pf3D7_07_v3: 628,346	PF3D7_0713900	Pf3D7_07_v3:626,391..641,230(-)	conserved Plasmodium protein, unknown function	N/A	Has Non-Synonymous	3144	G (0.9)	A	T	E	G
NGS_SNP.Pf3D7_08_v3.469018	Pf3D7_08_v3: 469,018	PF3D7_0809200	Pf3D7_08_v3:467,507..472,481(-)	asparagine-rich antigen Pfa55-14	pfa55-14	Has Non-Synonymous	959	G (0.94)	S	C	C	G
NGS_SNP.Pf3D7_08_v3.490746	Pf3D7_08_v3: 490,746	PF3D7_0809600	Pf3D7_08_v3:479,438..497,431(-)	peptidase family C50, putative	N/A	Has Non-Synonymous	2213	C (0.99)	D	T	N	C
NGS_SNP.Pf3D7_08_v3.501529	Pf3D7_08_v3: 501,529	PF3D7_0809700	Pf3D7_08_v3:499,463..501,569(-)	RuvB-like helicase 1	RUVB1	Has Non-Synonymous	14	C (0.97)	S	T	N	C
NGS_SNP.Pf3D7_08_v3.693543	Pf3D7_08_v3: 693,543	PF3D7_0814300	Pf3D7_08_v3:690,182..694,542(-)	AAA family ATPase, putative	N/A	Synonymous	201	A (0.93)	L	G	N/A	A
NGS_SNP.Pf3D7_10_v3.1391786	Pf3D7_10_v3: 1,391,786	PF3D7_1035100	Pf3D7_10_v3:1,391,390..1,393,405(+)	probable protein, unknown function	N/A	Synonymous	114	A (0.83)	K	G	N/A	A
NGS_SNP.Pf3D7_10_v3.1391795	Pf3D7_10_v3: 1,391,795	PF3D7_1035100	Pf3D7_10_v3:1,391,390..1,393,405(+)	probable protein, unknown function	N/A	Synonymous	117	A (0.55)	E	G	N/A	G
NGS_SNP.Pf3D7_10_v3.1392338	Pf3D7_10_v3: 1,392,338	PF3D7_1035100	Pf3D7_10_v3:1,391,390..1,393,405(+)	probable protein, unknown function	N/A	Synonymous	298	A (0.88)	K	G	N/A	A
NGS_SNP.Pf3D7_10_v3.1392351	Pf3D7_10_v3: 1,392,351	PF3D7_1035100	Pf3D7_10_v3:1,391,390..1,393,405(+)	probable protein, unknown function	N/A	Has Non-Synonymous	303	A (0.88)	K	G	E	A
NGS_SNP.Pf3D7_10_v3.1392353	Pf3D7_10_v3: 1,392,353	PF3D7_1035100	Pf3D7_10_v3:1,391,390..1,393,405(+)	probable protein, unknown function	N/A	Has Non-Synonymous	303	A (0.74)	K	G	E	A
NGS_SNP.Pf3D7_10_v3.1392360	Pf3D7_10_v3: 1,392,360	PF3D7_1035100	Pf3D7_10_v3:1,391,390..1,393,405(+)	probable protein, unknown function	N/A	Has Non-Synonymous	306	A (0.88)	T	T	S	A
NGS_SNP.Pf3D7_10_v3.1392364	Pf3D7_10_v3: 1,392,364	PF3D7_1035100	Pf3D7_10_v3:1,391,390..1,393,405(+)	probable protein, unknown function	N/A	Has Non-Synonymous	307	T (0.88)	V	A	E	T
NGS_SNP.Pf3D7_10_v3.217709	Pf3D7_10_v3: 217,709	PF3D7_1004600	Pf3D7_10_v3:1,391,390..1,393,405(+)	probable protein, unknown function	N/A	Has Non-Synonymous	557	A (0.69)	I	G	M	A
NGS_SNP.Pf3D7_10_v3.217875	Pf3D7_10_v3: 217,875	PF3D7_1004600	Pf3D7_10_v3:215,344..219,759(+)	conserved Plasmodium membrane protein, unknown function	N/A	Has Non-Synonymous	613	C (0.68)	H	A	N	C
NGS_SNP.Pf3D7_10_v3.217900	Pf3D7_10_v3: 217,900	PF3D7_1004600	Pf3D7_10_v3:215,344..219,759(+)	conserved Plasmodium membrane protein, unknown function	N/A	Has Non-Synonymous	621	C (0.69)	A	T	V	C
NGS_SNP.Pf3D7_10_v3.218870	Pf3D7_10_v3: 218,870	PF3D7_1004600	Pf3D7_10_v3:215,344..219,759(+)	conserved Plasmodium membrane protein, unknown function	N/A	Has Non-Synonymous	896	T (0.96)	L	C	P	T
NGS_SNP.Pf3D7_11_v3.1019739	Pf3D7_11_v3: 1,019,739	PF3D7_1126100	Pf3D7_11_v3:1,018,358..1,022,935(-)	autophagy-related protein 7, putative	ATG7	Synonymous	919	G (0.94)	S	A	N/A	G
NGS_SNP.Pf3D7_11_v3.1640343	Pf3D7_11_v3: 1,640,343	PF3D7_1140900	Pf3D7_11_v3:1,636,768..1,643,539(-)	NdP1 protein, putative	N/A	Has Non-Synonymous	865	C (0.79)	G	T	E	C
NGS_SNP.Pf3D7_12_v3.1542202	Pf3D7_12_v3: 1,542,202	PF3D7_1237100	Pf3D7_12_v3:1,540,473..1,549,441(-)	conserved Plasmodium protein, unknown function	N/A	Has Non-Synonymous	2315	C (0.97)	D	G	H	C
NGS_SNP.Pf3D7_12_v3.181371	Pf3D7_12_v3: 181,371	PF3D7_1203400	Pf3D7_12_v3:177,518..182,002(+)	major facilitator superfamily domain-containing protein, putative	MFS4	Synonymous	1070	C (0.94)	F	T	N/A	C
NGS_SNP.Pf3D7_12_v3.659819	Pf3D7_12_v3: 659,819	PF3D7_1216600	Pf3D7_12_v3:659,738..660,286(-)	cell traversal protein for ookinetes and sporozoites	CelTOS	Has Non-Synonymous	156	A (0.88)	N	T	K	T
NGS_SNP.Pf3D7_12_v3.659820	Pf3D7_12_v3: 659,820	PF3D7_1216600	Pf3D7_12_v3:659,738..660,286(-)	cell traversal protein for ookinetes and sporozoites	CelTOS	Has Non-Synonymous	156	T (0.97)	N	C	K	T
NGS_SNP.Pf3D7_12_v3.659823	Pf3D7_12_v3: 659,823	PF3D7_1216600	Pf3D7_12_v3:659,738..660,286(-)	cell traversal protein for ookinetes and sporozoites	CelTOS	Has Non-Synonymous	155	G (0.55)	A	A	V	G
NGS_SNP.Pf3D7_12_v3.659824	Pf3D7_12_v3: 659,824	PF3D7_1216600	Pf3D7_12_v3:659,738..660,286(-)	cell traversal protein for ookinetes and sporozoites	CelTOS	Has Non-Synonymous	155	C (0.91)	A	T	V	C
NGS_SNP.Pf3D7_12_v3.659836	Pf3D7_12_v3: 659,836	PF3D7_1216600	Pf3D7_12_v3:659,738..660,286(-)	cell traversal protein for ookinetes and sporozoites	CelTOS	Has Non-Synonymous	151	T (0.97)	T	A	S	T
NGS_SNP.Pf3D7_12_v3.659929	Pf3D7_12_v3: 659,929	PF3D7_1216600	Pf3D7_12_v3:659,738..660,286(-)	cell traversal protein for ookinetes and sporozoites	CelTOS	Has Non-Synonymous	120	G (0.52)	L	C	V	G
NGS_SNP.Pf3D7_13_v3.1419415	Pf3D7_13_v3: 1,419,415	PF3D7_1335100	Pf3D7_12_v3:659,738..660,286(-)	cell traversal protein for ookinetes and sporozoites	CelTOS	Has Non-Synonymous	243	T (0.63)	K	C	E	T
NGS_SNP.Pf3D7_13_v3.1419424	Pf3D7_13_v3: 1,419,424	PF3D7_1335100	Pf3D7_13_v3:1,418,213..1,421,552(-)	merozoite surface protein 7	MSP7	Has Non-Synonymous	240	A (0.51)	Y	G	H	A
NGS_SNP.Pf3D7_13_v3.1419448	Pf3D7_13_v3: 1,419,448	PF3D7_1335100	Pf3D7_13_v3:1,418,213..1,421,552(-)	merozoite surface protein 7	MSP7	Has Non-Synonymous	232	C (0.69)	E	T	K	T
NGS_SNP.Pf3D7_13_v3.1465176	Pf3D7_13_v3: 1,465,176	PF3D7_1335900	Pf3D7_13_v3:1,464,895..1,466,619(-)	thrombospondin-related anonymous protein	TRAP	Has Non-Synonymous	482	G (0.61)	H	A	Y	G
NGS_SNP.Pf3D7_13_v3.1465494	Pf3D7_13_v3: 1,465,494	PF3D7_1335900	Pf3D7_13_v3:1,464,895..1,466,619(-)	thrombospondin-related anonymous protein	TRAP	Has Non-Synonymous	376	C (0.81)	E	T	K	C
NGS_SNP.Pf3D7_13_v3.1465500	Pf3D7_13_v3: 1,465,500	PF3D7_1335900	Pf3D7_13_v3:1,464,895..1,466,619(-)	thrombospondin-related anonymous protein	TRAP	Has Non-Synonymous	374	C (0.67)	E	G	Q	C
NGS_SNP.Pf3D7_13_v3.1465680	Pf3D7_13_v3: 1,465,680	PF3D7_1335900	Pf3D7_13_v3:1,464,895..1,466,619(-)	thrombospondin-related anonymous protein	TRAP	Has Non-Synonymous	314	C (0.76)	E	G	Q	C
NGS_SNP.Pf3D7_13_v3.1465683	Pf3D7_13_v3: 1,465,683	PF3D7_1335900	Pf3D7_13_v3:1,464,895..1,466,619(-)	thrombospondin-related anonymous protein	TRAP	Has Non-Synonymous	313	C (0.96)	V	A	F	C
NGS_SNP.Pf3D7_13_v3.1465686	Pf3D7_13_v3: 1,465,686	PF3D7_1335900	Pf3D7_13_v3:1,464,895..1,466,619(-)	thrombospondin-related anonymous protein	TRAP	Has Non-Synonymous	312	C (0.83)	A	A	V	C
NGS_SNP.Pf3D7_13_v3.1465688	Pf3D7_13_v3: 1,465,688	PF3D7_1335900	Pf3D7_13_v3:1,464,895..1,466,619(-)	thrombospondin-related anonymous protein	TRAP	Has Non-Synonymous	311	A (0.83)	F	G	S	A
NGS_SNP.Pf3D7_13_v3.1465760	Pf3D7_13_v3: 1,465,760	PF3D7_1335900	Pf3D7_13_v3:1,464,895..1,466,619(-)	thrombospondin-related anonymous protein	TRAP	Has Non-Synonymous	287	G (0.95)	P	A	L	A
NGS_SNP.Pf3D7_13_v3.1465809	Pf3D7_13_v3: 1,465,809	PF3D7_1335900	Pf3D7_13_v3:1,464,895..1,466,619(-)	thrombospondin-related anonymous protein	TRAP	Has Non-Synonymous	271	C (0.93)	E	T	K	C
NGS_SNP.Pf3D7_13_v3.1465814	Pf3D7_13_v3: 1,465,814	PF3D7_1335900	Pf3D7_13_v3:1,464,895..1,466,619(-)	thrombospondin-related anonymous protein	TRAP	Has Non-Synonymous	269	A (1)	L	G	S	A
NGS_SNP.Pf3D7_13_v3.1465937	Pf3D7_13_v3: 1,465,937	PF3D7_1335900	Pf3D7_13_v3:1,464,895..1,466,619(-)	thrombospondin-related anonymous protein	TRAP	Has Non-Synonymous	228	C (0.97)	G	A	V	C
NGS_SNP.Pf3D7_13_v3.1466111	Pf3D7_13_v3: 1,466,111	PF3D7_1335900	Pf3D7_13_v3:1,464,895..1,466,619(-)	thrombospondin-related anonymous protein	TRAP	Has Non-Synonymous	170	T (0.98)	D	C	G	T
NGS_SNP.Pf3D7_13_v3.1466124	Pf3D7_13_v3: 1,466,124	PF3D7_1335900	Pf3D7_13_v3:1,464,895..1,466,619(-)	thrombospondin-related anonymous protein	TRAP	Has Non-Synonymous	166	C (0.75)	D	T	N	C
NGS_SNP.Pf3D7_13_v3.1466219	Pf3D7_13_v3: 1,466,219	PF3D7_1335900	Pf3D7_13_v3:1,464,895..1,466,619(-)	thrombospondin-related anonymous protein	TRAP	Has Non-Synonymous	134	G (0.6)	T	C	S	G
NGS_SNP.Pf3D7_13_v3.1466231	Pf3D7_13_v3: 1,466,231	PF3D7_1335900	Pf3D7_13_v3:1,464,895..1,466,619(-)	thrombospondin-related anonymous protein	TRAP	Has Non-Synonymous	130	C (0.87)	R	T	K	T
NGS_SNP.Pf3D7_13_v3.1466237	Pf3D7_13_v3: 1,466,237	PF3D7_1335900	Pf3D7_13_v3:1,464,895..1,466,619(-)	thrombospondin-related anonymous protein	TRAP	Has Non-Synonymous	128	T (0.63)	Y	A	F	T
NGS_SNP.Pf3D7_13_v3.1466252	Pf3D7_13_v3: 1,466,252	PF3D7_1335900	Pf3D7_13_v3:1,464,895..1,466,619(-)	thrombospondin-related anonymous protein	TRAP	Has Non-Synonymous	123	C (0.84)	S	T	N	C
NGS_SNP.Pf3D7_13_v3.1466264	Pf3D7_13_v3: 1,466,264	PF3D7_1335900	Pf3D7_13_v3:1,464,895..1,466,619(-)	thrombospondin-related anonymous protein	TRAP	Has Non-Synonymous	119	T (0.9)	K	C	R	T
NGS_SNP.Pf3D7_13_v3.1466327	Pf3D7_13_v3: 1,466,327	PF3D7_1335900	Pf3D7_13_v3:1,464,895..1,466,619(-)	thrombospondin-related anonymous protein	TRAP	Has Non-Synonymous	98	C (0.68)	R	T	K	C
NGS_SNP.Pf3D7_13_v3.2114497	Pf3D7_13_v3: 2,114,497	PF3D7_1352900	Pf3D7_13_v3:2,113,577..2,116,771(-)	Plasmodium exported protein, unknown function	N/A	Has Non-Synonymous	470	T (0.96)	K	G	Q	T
NGS_SNP.Pf3D7_13_v3.2114559	Pf3D7_13_v3: 2,114,559	PF3D7_1352900	Pf3D7_13_v3:2,113,577..2,116,771(-)	Plasmodium exported protein, unknown function	N/A	Has Non-Synonymous	449	T (0.93)	K	A	N	T
NGS_SNP.Pf3D7_13_v3.2114576	Pf3D7_13_v3: 2,114,576	PF3D7_1352900	Pf3D7_13_v3:2,113,577..2,116,771(-)	Plasmodium exported protein, unknown function	N/A	Has Non-Synonymous	444	T (0.91)	M	A	L	T
NGS_SNP.Pf3D7_13_v3.2115023	Pf3D7_13_v3: 2,115,023	PF3D7_1352900	Pf3D7_13_v3:2,113,577..2,116,771(-)	Plasmodium exported protein, unknown function	N/A	Has Non-Synonymous	295	T (0.99)	N	G	H	T
NGS_SNP.Pf3D7_13_v3.2115117	Pf3D7_13_v3: 2,115,117	PF3D7_1352900	Pf3D7_13_v3:2,113,577..2,116,771(-)	Plasmodium exported protein, unknown function	N/A	Has Non-Synonymous	263	T (0.67)	L	G	F	T
NGS_SNP.Pf3D7_14_v3.2951640	Pf3D7_14_v3: 2,951,640	PF3D7_1472200	Pf3D7_14_v3:2,944,069..2,953,562(+)	histone deacetylase, putative	HDA1	Has Non-Synonymous	1993	T (0.73)	D	A	E	T
NGS_SNP.Pf3D7_14_v3.3121113	Pf3D7_14_v3: 3,121,113	PF3D7_1475800	Pf3D7_14_v3:3,120,854..3,121,849(+)	conserved Plasmodium protein, unknown function	N/A	Has Non-Synonymous	87	C (0.96)	T	T	S	C
NGS_SNP.Pf3D7_14_v3.3121223	Pf3D7_14_v3: 3,121,223	PF3D7_1475800	Pf3D7_14_v3:3,120,854..3,121,849(+)	conserved Plasmodium protein, unknown function	N/A	Has Non-Synonymous	124	G (0.52)	E	C	Q	G
NGS_SNP.Pf3D7_14_v3.3121227	Pf3D7_14_v3: 3,121,227	PF3D7_1475800	Pf3D7_14_v3:3,120,854..3,121,849(+)	conserved Plasmodium protein, unknown function	N/A	Has Non-Synonymous	125	A (0.77)	H	G	R	G
NGS_SNP.Pf3D7_14_v3.3121230	Pf3D7_14_v3: 3,121,230	PF3D7_1475800	Pf3D7_14_v3:3,120,854..3,121,849(+)	conserved Plasmodium protein, unknown function	N/A	Has Non-Synonymous	126	C (0.99)	A	T	V	C
NGS_SNP.Pf3D7_14_v3.3121290	Pf3D7_14_v3: 3,121,290	PF3D7_1475800	Pf3D7_14_v3:3,120,854..3,121,849(+)	conserved Plasmodium protein, unknown function	N/A	Has Non-Synonymous	146	T (0.85)	L	C	S	T
NGS_SNP.Pf3D7_14_v3.3121373	Pf3D7_14_v3: 3,121,373	PF3D7_1475800	Pf3D7_14_v3:3,120,854..3,121,849(+)	conserved Plasmodium protein, unknown function	N/A	Has Non-Synonymous	174	A (0.99)	T	G	A	A
NGS_SNP.Pf3D7_14_v3.3121404	Pf3D7_14_v3: 3,121,404	PF3D7_1475800	Pf3D7_14_v3:3,120,854..3,121,849(+)	conserved Plasmodium protein, unknown function	N/A	Has Non-Synonymous	184	G (0.81)	C	T	F	G
NGS_SNP.Pf3D7_14_v3.3121409	Pf3D7_14_v3: 3,121,409	PF3D7_1475800	Pf3D7_14_v3:3,120,854..3,121,849(+)	conserved Plasmodium protein, unknown function	N/A	Has Non-Synonymous	186	T (0.87)	L	A	I	T
NGS_SNP.Pf3D7_14_v3.3121428	Pf3D7_14_v3: 3,121,428	PF3D7_1475800	Pf3D7_14_v3:3,120,854..3,121,849(+)	conserved Plasmodium protein, unknown function	N/A	Has Non-Synonymous	192	T (0.88)	M	G	R	T
NGS_SNP.Pf3D7_14_v3.3121436	Pf3D7_14_v3: 3,121,436	PF3D7_1475800	Pf3D7_14_v3:3,120,854..3,121,849(+)	conserved Plasmodium protein, unknown function	N/A	Has Non-Synonymous	195	C (0.67)	R	T	W	C
NGS_SNP.Pf3D7_14_v3.3121513	Pf3D7_14_v3: 3,121,513	PF3D7_1475800	Pf3D7_14_v3:3,120,854..3,121,849(+)	conserved Plasmodium protein, unknown function	N/A	Has Non-Synonymous	198	G (0.91)	R	C	S	G
NGS_SNP.Pf3D7_14_v3.3121516	Pf3D7_14_v3: 3,121,516	PF3D7_1475800	Pf3D7_14_v3:3,120,854..3,121,849(+)	conserved Plasmodium protein, unknown function	N/A	Has Non-Synonymous	199	A (0.92)	E	T	K	A
NGS_SNP.Pf3D7_14_v3.3121522	Pf3D7_14_v3: 3,121,522	PF3D7_1475800	Pf3D7_14_v3:3,120,854..3,121,849(+)	conserved Plasmodium protein, unknown function	N/A	Has Non-Synonymous	201	A (0.53)	L	T	F	A
NGS_SNP.Pf3D7_14_v3.3121524	Pf3D7_14_v3: 3,121,524	PF3D7_1475800	Pf3D7_14_v3:3,120,854..3,121,849(+)	conserved Plasmodium protein, unknown function	N/A	Has Non-Synonymous	202	A (0.85)	K	G	R	A
NGS_SNP.Pf3D7_14_v3.3121550	Pf3D7_14_v3: 3,121,550	PF3D7_1475800	Pf3D7_14_v3:3,120,854..3,121,849(+)	conserved Plasmodium protein, unknown function	N/A	Has Non-Synonymous	211	A (0.82)	T	C	P	A
NGS_SNP.Pf3D7_14_v3.3121572	Pf3D7_14_v3: 3,121,572	PF3D7_1475800	Pf3D7_14_v3:3,120,854..3,121,849(+)	conserved Plasmodium protein, unknown function	N/A	Has Non-Synonymous	218	T (0.9)	L	C	P	T
NGS_SNP.Pf3D7_14_v3.3193573	Pf3D7_14_v3: 3,193,573	PF3D7_1477600	Pf3D7_14_v3:3,192,675..3,199,877(+)	surface-associated interspersed protein 14.1 (SURFIN 14.1)	SURF14.1	Has Non-Synonymous	97	G (0.93)	E	A	K	G

## Sheet: Table_S6_topIHS_FalaTemp
SNP	CHR	POS	log10qvalue_07	log1oqvalue_13	log10qvalue_1517	SNP Id	Location (SNP)	Gene ID	Genomic Location (Gene)	Product Description	Gene Name or Symbol	Position in protein	Major Allele	Major Product	Minor Allele	Minor Product	Has Non-synonymous
NGS_SNP.Pf3D7_01_v3.180054	1	180054	0.091781	3.2012	0	NGS_SNP.Pf3D7_01_v3.180054	Pf3D7_01_v3: 180,054	PF3D7_0104100	Pf3D7_01_v3:177,187..181,825(+)	protein E140, putative	N/A	547	G (0.82)	R	A	K	Has Non-Synonymous
NGS_SNP.Pf3D7_01_v3.180068	1	180068	2.79037	1.73163	0	NGS_SNP.Pf3D7_01_v3.180068	Pf3D7_01_v3: 180,068	PF3D7_0104100	Pf3D7_01_v3:177,187..181,825(+)	protein E140, putative	N/A	552	C (0.79)	Q	G	G	Has Non-Synonymous
NGS_SNP.Pf3D7_01_v3.180186	1	180186	0	2.28864	0	NGS_SNP.Pf3D7_01_v3.180186	Pf3D7_01_v3: 180,186	PF3D7_0104100	Pf3D7_01_v3:177,187..181,825(+)	protein E140, putative	N/A	591	G (0.82)	G	A	R	Has Non-Synonymous
NGS_SNP.Pf3D7_01_v3.180285	1	180285	0.39102	2.55003	0	NGS_SNP.Pf3D7_01_v3.180285	Pf3D7_01_v3: 180,285	PF3D7_0104100	Pf3D7_01_v3:177,187..181,825(+)	protein E140, putative	N/A	624	G (0.6)	R	T	I	Has Non-Synonymous
NGS_SNP.Pf3D7_01_v3.180288	1	180288	0.0158876	3.65634	0	NGS_SNP.Pf3D7_01_v3.180288	Pf3D7_01_v3: 180,288	PF3D7_0104100	Pf3D7_01_v3:177,187..181,825(+)	protein E140, putative	N/A	625	C (0.58)	T	A	N	Has Non-Synonymous
NGS_SNP.Pf3D7_01_v3.180297	1	180297	0	2.57424	0	NGS_SNP.Pf3D7_01_v3.180297	Pf3D7_01_v3: 180,297	PF3D7_0104100	Pf3D7_01_v3:177,187..181,825(+)	protein E140, putative	N/A	628	A (0.58)	D	G	G	Has Non-Synonymous
NGS_SNP.Pf3D7_01_v3.180299	1	180299	0	5.33564	0	NGS_SNP.Pf3D7_01_v3.180299	Pf3D7_01_v3: 180,299	PF3D7_0104100	Pf3D7_01_v3:177,187..181,825(+)	protein E140, putative	N/A	629	C (0.57)	R	G	G	Has Non-Synonymous
NGS_SNP.Pf3D7_01_v3.180311	1	180311	0	2.93603	0	NGS_SNP.Pf3D7_01_v3.180311	Pf3D7_01_v3: 180,311	PF3D7_0104100	Pf3D7_01_v3:177,187..181,825(+)	protein E140, putative	N/A	633	A (0.51)	H	C	N	Has Non-Synonymous
NGS_SNP.Pf3D7_01_v3.180314	1	180314	0	7.06795	0	NGS_SNP.Pf3D7_01_v3.180314	Pf3D7_01_v3: 180,314	PF3D7_0104100	Pf3D7_01_v3:177,187..181,825(+)	protein E140, putative	N/A	634	C (0.88)	L	A	I	Has Non-Synonymous
NGS_SNP.Pf3D7_01_v3.495747	1	495747	1.16287	0.00685724	0.00441981	NGS_SNP.Pf3D7_01_v3.495747	Pf3D7_01_v3: 495,747	PF3D7_0113100	Pf3D7_01_v3:494,941..500,347(+)	surface-associated interspersed protein 1.1 (SURFIN 1.1)	SURF1.1	168	A (0.72)	K	T	N	Has Non-Synonymous
NGS_SNP.Pf3D7_01_v3.495994	1	495994	1.38459	1.76991	0	NGS_SNP.Pf3D7_01_v3.495994	Pf3D7_01_v3: 495,994	PF3D7_0113100	Pf3D7_01_v3:494,941..500,347(+)	surface-associated interspersed protein 1.1 (SURFIN 1.1)	SURF1.1	251	C (0.65)	Q	G	E	Has Non-Synonymous
NGS_SNP.Pf3D7_01_v3.536091	1	536091	0	2.13942	1.78687	NGS_SNP.Pf3D7_01_v3.536091	Pf3D7_01_v3: 536,091	PF3D7_0113800	Pf3D7_01_v3:526,530..536,562(+)	DBL containing protein, unknown function	N/A	2815	A (0.84)	T	G	A	Has Non-Synonymous
NGS_SNP.Pf3D7_01_v3.536113	1	536113	0	0	1.79117	NGS_SNP.Pf3D7_01_v3.536113	Pf3D7_01_v3: 536,113	PF3D7_0113800	Pf3D7_01_v3:526,530..536,562(+)	DBL containing protein, unknown function	N/A	2822	A (0.76)	E	G	G	Has Non-Synonymous
NGS_SNP.Pf3D7_03_v3.221462	3	221462	0	3.76838	0	NGS_SNP.Pf3D7_03_v3.221462	Pf3D7_03_v3: 221,462	PF3D7_0304600	Pf3D7_03_v3:221,112..223,145(-)	circumsporozoite (CS) protein	CSP	352	T (0.9)	N	C	G	Has Non-Synonymous
NGS_SNP.Pf3D7_03_v3.221463	3	221463	0	7.71797	0	NGS_SNP.Pf3D7_03_v3.221463	Pf3D7_03_v3: 221,463	PF3D7_0304600	Pf3D7_03_v3:221,112..223,145(-)	circumsporozoite (CS) protein	CSP	352	T (0.85)	N	C	G	Has Non-Synonymous
NGS_SNP.Pf3D7_03_v3.221556	3	221556	0.0232798	1.99887	0	NGS_SNP.Pf3D7_03_v3.221556	Pf3D7_03_v3: 221,556	PF3D7_0304600	Pf3D7_03_v3:221,112..223,145(-)	circumsporozoite (CS) protein	CSP	321	T (0.95)	K	G	N	Has Non-Synonymous
NGS_SNP.Pf3D7_03_v3.891612	3	891612	0	0.00569456	1.92535	NGS_SNP.Pf3D7_03_v3.891612	Pf3D7_03_v3: 891,612	PF3D7_0321300	Pf3D7_03_v3:889,611..893,080(-)	conserved Plasmodium protein, unknown function	N/A	385	C (0.81)	D	T	N	Has Non-Synonymous
NGS_SNP.Pf3D7_04_v3.255939	4	255939	0	0	1.75137	NGS_SNP.Pf3D7_04_v3.255939	Pf3D7_04_v3: 255,939	PF3D7_0404600	Pf3D7_04_v3:244,986..260,286(+)	conserved Plasmodium membrane protein, unknown function	N/A	2737	G (0.83)	G	A	R	Has Non-Synonymous
NGS_SNP.Pf3D7_04_v3.795946	4	795946	0	0.0085473	0.62067	NGS_SNP.Pf3D7_04_v3.795946	Pf3D7_04_v3: 795,946	PF3D7_0418000	Pf3D7_04_v3:793,749..810,923(+)	conserved Plasmodium protein, unknown function	N/A	641	C (0.93)	D	A	E	Has Non-Synonymous
NGS_SNP.Pf3D7_04_v3.887994	4	887994	1.02985	0	0.209682	NGS_SNP.Pf3D7_04_v3.887994	Pf3D7_04_v3: 887,994	PF3D7_0419900	Pf3D7_04_v3:876,213..894,383(+)	phosphatidylinositol 4-kinase, putative	N/A	3222	A (0.64)	I	G	M	Has Non-Synonymous
NGS_SNP.Pf3D7_04_v3.926248	4	926248	0	2.10313	0	NGS_SNP.Pf3D7_04_v3.926248	Pf3D7_04_v3: 926,248	PF3D7_0420300	Pf3D7_04_v3:915,895..928,649(+)	AP2 domain transcription factor, putative	ApiAP2	2753	A (0.8)	I	T	N/A	Synonymous
NGS_SNP.Pf3D7_04_v3.990908	4	990908	0.00911281	1.70753	0	NGS_SNP.Pf3D7_04_v3.990908	Pf3D7_04_v3: 990,908	PF3D7_0421700	Pf3D7_04_v3:987,842..994,360(-)	conserved Plasmodium protein, unknown function	N/A	1151	T (0.74)	I	A	N/A	Synonymous
NGS_SNP.Pf3D7_04_v3.991000	4	991000	0.00455705	2.16602	0	NGS_SNP.Pf3D7_04_v3.991000	Pf3D7_04_v3: 991,000	PF3D7_0421700	Pf3D7_04_v3:987,842..994,360(-)	conserved Plasmodium protein, unknown function	N/A	1121	T (0.71)	T	C	A	Has Non-Synonymous
NGS_SNP.Pf3D7_04_v3.991236	4	991236	0.00515086	3.31294	0	NGS_SNP.Pf3D7_04_v3.991236	Pf3D7_04_v3: 991,236	PF3D7_0421700	Pf3D7_04_v3:987,842..994,360(-)	conserved Plasmodium protein, unknown function	N/A	1042	C (0.77)	C	T	Y	Has Non-Synonymous
NGS_SNP.Pf3D7_05_v3.615420	5	615420	0	0.00554508	1.16752	NGS_SNP.Pf3D7_05_v3.615420	Pf3D7_05_v3: 615,420	PF3D7_0514800	Pf3D7_05_v3:615,232..618,202(-)	inositol polyphosphate multikinase, putative	N/A	858	G (0.92)	Y	A	N/A	Synonymous
NGS_SNP.Pf3D7_06_v3.1027157	6	1027157	0.0155109	0.0122111	2.3294	NGS_SNP.Pf3D7_06_v3.1027157	Pf3D7_06_v3: 1,027,157	PF3D7_0625300	Pf3D7_06_v3:1,026,468..1,031,411(-)	mitochondrial DNA polymerase	MtDNAP	1334	T (0.96)	D	C	G	Has Non-Synonymous
NGS_SNP.Pf3D7_06_v3.1029663	6	1029663	0.00796658	0.0638627	1.42517	NGS_SNP.Pf3D7_06_v3.1029663	Pf3D7_06_v3: 1,029,663	PF3D7_0625300	Pf3D7_06_v3:1,026,468..1,031,411(-)	mitochondrial DNA polymerase	MtDNAP	499	T (0.95)	K	C	E	Has Non-Synonymous
NGS_SNP.Pf3D7_07_v3.256246	7	256246	0	2.02599	0	NGS_SNP.Pf3D7_07_v3.256246	Pf3D7_07_v3: 256,246	PF3D7_0705200	Pf3D7_07_v3:255,871..260,931(+)	conserved Plasmodium protein, unknown function	N/A	54	C (1)	S	T	N/A	Synonymous
NGS_SNP.Pf3D7_07_v3.415529	7	415529	1.15706	0.020025	0	NGS_SNP.Pf3D7_07_v3.415529	Pf3D7_07_v3: 415,529	PF3D7_0709300	Pf3D7_07_v3:413,560..422,436(-)	mediator of RNA polymerase II transcription subunit 14, putative	MED14	2074	G (0.75)	P	T	H	Has Non-Synonymous
NGS_SNP.Pf3D7_07_v3.415625	7	415625	1.74422	0.972643	0	NGS_SNP.Pf3D7_07_v3.415625	Pf3D7_07_v3: 415,625	PF3D7_0709300	Pf3D7_07_v3:413,560..422,436(-)	mediator of RNA polymerase II transcription subunit 14, putative	MED14	2042	C (0.76)	G	A	V	Has Non-Synonymous
NGS_SNP.Pf3D7_07_v3.415775	7	415775	0.0921537	2.17487	0	NGS_SNP.Pf3D7_07_v3.415775	Pf3D7_07_v3: 415,775	PF3D7_0709300	Pf3D7_07_v3:413,560..422,436(-)	mediator of RNA polymerase II transcription subunit 14, putative	MED14	1992	T (0.77)	N	C	S	Has Non-Synonymous
NGS_SNP.Pf3D7_07_v3.416615	7	416615	1.41827	0.0140646	0	NGS_SNP.Pf3D7_07_v3.416615	Pf3D7_07_v3: 416,615	PF3D7_0709300	Pf3D7_07_v3:413,560..422,436(-)	mediator of RNA polymerase II transcription subunit 14, putative	MED14	1712	T (0.8)	H	A	L	Has Non-Synonymous
NGS_SNP.Pf3D7_07_v3.426753	7	426753	2.97428	1.11474	0	NGS_SNP.Pf3D7_07_v3.426753	Pf3D7_07_v3: 426,753	PF3D7_0709400	Pf3D7_07_v3:422,674..427,278(-)	Cg7 protein	N/A	161	A (0.57)	V	T	E	Has Non-Synonymous
NGS_SNP.Pf3D7_07_v3.430364	7	430364	3.22191	1.23834	0	NGS_SNP.Pf3D7_07_v3.430364	Pf3D7_07_v3: 430,364	PF3D7_0709600	Pf3D7_07_v3:429,537..433,997(-)	ribonucleases P/MRP protein subunit POP1, putative	POP1	1073	T (0.58)	G	G	N/A	Synonymous
NGS_SNP.Pf3D7_07_v3.435497	7	435497	1.1732	0.0427816	0	NGS_SNP.Pf3D7_07_v3.435497	Pf3D7_07_v3: 435,497	PF3D7_0709700	Pf3D7_07_v3:434,748..436,518(-)	prodrug activation and resistance esterase	PARE	233	A (0.51)	A	T	N/A	Synonymous
NGS_SNP.Pf3D7_07_v3.450016	7	450016	1.0608	0	0	NGS_SNP.Pf3D7_07_v3.450016	Pf3D7_07_v3: 450,016	PF3D7_0710000	Pf3D7_07_v3:447,209..458,876(-)	conserved Plasmodium protein, unknown function	N/A	2435	A (0.52)	Y	G	H	Has Non-Synonymous
NGS_SNP.Pf3D7_07_v3.450711	7	450711	2.66622	0	0	NGS_SNP.Pf3D7_07_v3.450711	Pf3D7_07_v3: 450,711	PF3D7_0710000	Pf3D7_07_v3:447,209..458,876(-)	conserved Plasmodium protein, unknown function	N/A	2203	T (0.79)	K	G	T	Has Non-Synonymous
NGS_SNP.Pf3D7_07_v3.451126	7	451126	1.83024	0	0	NGS_SNP.Pf3D7_07_v3.451126	Pf3D7_07_v3: 451,126	PF3D7_0710000	Pf3D7_07_v3:447,209..458,876(-)	conserved Plasmodium protein, unknown function	N/A	2065	T (0.56)	S	C	G	Has Non-Synonymous
NGS_SNP.Pf3D7_07_v3.455974	7	455974	2.83863	0	0.0758207	NGS_SNP.Pf3D7_07_v3.455974	Pf3D7_07_v3: 455,974	PF3D7_0710000	Pf3D7_07_v3:447,209..458,876(-)	conserved Plasmodium protein, unknown function	N/A	841	A (0.53)	P	G	N/A	Synonymous
NGS_SNP.Pf3D7_07_v3.460942	7	460942	0	5.39504	5.42102	NGS_SNP.Pf3D7_07_v3.460942	Pf3D7_07_v3: 460,942	PF3D7_0710100	Pf3D7_07_v3:459,688..461,959(+)	conserved protein, unknown function	N/A	296	C (0.89)	Q	A	K	Has Non-Synonymous
NGS_SNP.Pf3D7_07_v3.471807	7	471807	5.63747	0	0	NGS_SNP.Pf3D7_07_v3.471807	Pf3D7_07_v3: 471,807	PF3D7_0710200	Pf3D7_07_v3:462,183..472,293(+)	conserved Plasmodium protein, unknown function	N/A	2901	G (0.97)	Q	T	H	Has Non-Synonymous
NGS_SNP.Pf3D7_07_v3.474754	7	474754	2.20082	0	0.00489551	NGS_SNP.Pf3D7_07_v3.474754	Pf3D7_07_v3: 474,754	PF3D7_0710400	Pf3D7_07_v3:474,350..475,968(+)	DNA repair protein RAD14, putative	RAD14	44	G (0.77)	K	A	N/A	Synonymous
NGS_SNP.Pf3D7_07_v3.475635	7	475635	2.18147	0	0.331811	NGS_SNP.Pf3D7_07_v3.475635	Pf3D7_07_v3: 475,635	PF3D7_0710400	Pf3D7_07_v3:474,350..475,968(+)	DNA repair protein RAD14, putative	RAD14	338	C (0.85)	T	A	K	Has Non-Synonymous
NGS_SNP.Pf3D7_07_v3.487614	7	487614	2.04326	0	0	NGS_SNP.Pf3D7_07_v3.487614	Pf3D7_07_v3: 487,614	PF3D7_0711000	Pf3D7_07_v3:486,497..491,719(-)	AAA family ATPase, CDC48 subfamily	CDC48	1119	A (0.98)	T	T	N/A	Synonymous
NGS_SNP.Pf3D7_07_v3.487758	7	487758	0	3.70172	0	NGS_SNP.Pf3D7_07_v3.487758	Pf3D7_07_v3: 487,758	PF3D7_0711000	Pf3D7_07_v3:486,497..491,719(-)	AAA family ATPase, CDC48 subfamily	CDC48	1071	T (0.95)	T	G	N/A	Synonymous
NGS_SNP.Pf3D7_07_v3.492639	7	492639	3.24394	0.00543781	0.00767177	NGS_SNP.Pf3D7_07_v3.492639	Pf3D7_07_v3: 492,639	PF3D7_0711100	Pf3D7_07_v3:491,933..494,421(-)	conserved protein, unknown function	N/A	198	T (0.8)	G	C	N/A	Synonymous
NGS_SNP.Pf3D7_07_v3.492725	7	492725	2.54113	0.00707388	0.00836369	NGS_SNP.Pf3D7_07_v3.492725	Pf3D7_07_v3: 492,725	PF3D7_0711100	Pf3D7_07_v3:491,933..494,421(-)	conserved protein, unknown function	N/A	170	T (0.86)	I	C	V	Has Non-Synonymous
NGS_SNP.Pf3D7_07_v3.495859	7	495859	1.72871	0	0.107075	NGS_SNP.Pf3D7_07_v3.495859	Pf3D7_07_v3: 495,859	PF3D7_0711200	Pf3D7_07_v3:494,948..498,596(+)	conserved Plasmodium protein, unknown function	N/A	208	A (0.74)	I	T	L	Has Non-Synonymous
NGS_SNP.Pf3D7_07_v3.496692	7	496692	1.75772	0.00634906	0.262833	NGS_SNP.Pf3D7_07_v3.496692	Pf3D7_07_v3: 496,692	PF3D7_0711200	Pf3D7_07_v3:494,948..498,596(+)	conserved Plasmodium protein, unknown function	N/A	485	T (0.66)	F	C	N/A	Synonymous
NGS_SNP.Pf3D7_07_v3.502586	7	502586	0	2.27712	0	NGS_SNP.Pf3D7_07_v3.502586	Pf3D7_07_v3: 502,586	PF3D7_0711400	Pf3D7_07_v3:500,019..503,352(-)	histone deacetylase complex subunit SAP18, putative	SAP18	3	T (0.87)	R	A	S	Has Non-Synonymous
NGS_SNP.Pf3D7_07_v3.505865	7	505865	1.40864	0.0103109	0.00484027	NGS_SNP.Pf3D7_07_v3.505865	Pf3D7_07_v3: 505,865	PF3D7_0711500	Pf3D7_07_v3:504,540..507,864(+)	regulator of chromosome condensation, putative	N/A	207	A (0.86)	E	G	N/A	Synonymous
NGS_SNP.Pf3D7_07_v3.506353	7	506353	0	2.50608	0	NGS_SNP.Pf3D7_07_v3.506353	Pf3D7_07_v3: 506,353	PF3D7_0711500	Pf3D7_07_v3:504,540..507,864(+)	regulator of chromosome condensation, putative	N/A	370	C (0.78)	T	T	I	Has Non-Synonymous
NGS_SNP.Pf3D7_07_v3.506750	7	506750	3.60842	1.83105	0	NGS_SNP.Pf3D7_07_v3.506750	Pf3D7_07_v3: 506,750	PF3D7_0711500	Pf3D7_07_v3:504,540..507,864(+)	regulator of chromosome condensation, putative	N/A	502	A (0.72)	R	T	S	Has Non-Synonymous
NGS_SNP.Pf3D7_07_v3.614894	7	614894	0	6.29212	0	NGS_SNP.Pf3D7_07_v3.614894	Pf3D7_07_v3: 614,894	PF3D7_0713500	Pf3D7_07_v3:613,821..617,804(+)	conserved Plasmodium protein, unknown function	N/A	170	A (0.89)	I	G	M	Has Non-Synonymous
NGS_SNP.Pf3D7_07_v3.614929	7	614929	0	6.29212	0	NGS_SNP.Pf3D7_07_v3.614929	Pf3D7_07_v3: 614,929	PF3D7_0713500	Pf3D7_07_v3:613,821..617,804(+)	conserved Plasmodium protein, unknown function	N/A	182	G (0.89)	G	A	D	Has Non-Synonymous
NGS_SNP.Pf3D7_07_v3.614985	7	614985	0	4.67583	0	NGS_SNP.Pf3D7_07_v3.614985	Pf3D7_07_v3: 614,985	PF3D7_0713500	Pf3D7_07_v3:613,821..617,804(+)	conserved Plasmodium protein, unknown function	N/A	201	A (0.89)	N	T	Y	Has Non-Synonymous
NGS_SNP.Pf3D7_07_v3.615869	7	615869	2.70623	0.0344119	0	NGS_SNP.Pf3D7_07_v3.615869	Pf3D7_07_v3: 615,869	PF3D7_0713500	Pf3D7_07_v3:613,821..617,804(+)	conserved Plasmodium protein, unknown function	N/A	495	C (0.71)	I	A	N/A	Synonymous
NGS_SNP.Pf3D7_07_v3.616570	7	616570	0	2.18973	0	NGS_SNP.Pf3D7_07_v3.616570	Pf3D7_07_v3: 616,570	PF3D7_0713500	Pf3D7_07_v3:613,821..617,804(+)	conserved Plasmodium protein, unknown function	N/A	729	C (0.94)	S	T	L	Has Non-Synonymous
NGS_SNP.Pf3D7_07_v3.618240	7	618240	3.4322	0	0	NGS_SNP.Pf3D7_07_v3.618240	Pf3D7_07_v3: 618,240	PF3D7_0713600	Pf3D7_07_v3:617,889..621,078(+)	ribosomal protein S5, mitochondrial, putative	N/A	103	T (0.81)	V	C	A	Has Non-Synonymous
NGS_SNP.Pf3D7_07_v3.620279	7	620279	1.73349	0.00833441	0.0082347	NGS_SNP.Pf3D7_07_v3.620279	Pf3D7_07_v3: 620,279	PF3D7_0713600	Pf3D7_07_v3:617,889..621,078(+)	ribosomal protein S5, mitochondrial, putative	N/A	722	G (0.67)	A	A	N/A	Synonymous
NGS_SNP.Pf3D7_07_v3.628346	7	628346	0	9.66863	0	NGS_SNP.Pf3D7_07_v3.628346	Pf3D7_07_v3: 628,346	PF3D7_0713900	Pf3D7_07_v3:626,391..641,230(-)	conserved Plasmodium protein, unknown function	N/A	3144	G (0.9)	A	T	E	Has Non-Synonymous
NGS_SNP.Pf3D7_07_v3.631810	7	631810	2.85567	0	0	NGS_SNP.Pf3D7_07_v3.631810	Pf3D7_07_v3: 631,810	PF3D7_0713900	Pf3D7_07_v3:626,391..641,230(-)	conserved Plasmodium protein, unknown function	N/A	1989	T (0.79)	K	A	N	Has Non-Synonymous
NGS_SNP.Pf3D7_07_v3.631868	7	631868	2.72888	0	0	NGS_SNP.Pf3D7_07_v3.631868	Pf3D7_07_v3: 631,868	PF3D7_0713900	Pf3D7_07_v3:626,391..641,230(-)	conserved Plasmodium protein, unknown function	N/A	1970	T (0.85)	D	C	G	Has Non-Synonymous
NGS_SNP.Pf3D7_08_v3.468690	8	468690	0.0346973	0	1.08758	NGS_SNP.Pf3D7_08_v3.1310722	Pf3D7_08_v3: 1,310,722	PF3D7_0830800	Pf3D7_08_v3:1,309,285..1,317,662(+)	surface-associated interspersed protein 8.2 (SURFIN 8.2)	SURF8.2	29	T (0.84)	V	A	D	Has Non-Synonymous
NGS_SNP.Pf3D7_08_v3.469018	8	469018	0	0.00508	2.54313	NGS_SNP.Pf3D7_08_v3.468690	Pf3D7_08_v3: 468,690	PF3D7_0809200	Pf3D7_08_v3:467,507..472,481(-)	asparagine-rich antigen Pfa55-14	Pfa55-14	1068	T (0.76)	K	A	N	Has Non-Synonymous
NGS_SNP.Pf3D7_08_v3.469490	8	469490	0.00996051	0	1.71533	NGS_SNP.Pf3D7_08_v3.469018	Pf3D7_08_v3: 469,018	PF3D7_0809200	Pf3D7_08_v3:467,507..472,481(-)	asparagine-rich antigen Pfa55-14	Pfa55-14	959	G (0.94)	S	C	C	Has Non-Synonymous
NGS_SNP.Pf3D7_08_v3.469505	8	469505	0.00568941	0	1.71533	NGS_SNP.Pf3D7_08_v3.469490	Pf3D7_08_v3: 469,490	PF3D7_0809200	Pf3D7_08_v3:467,507..472,481(-)	asparagine-rich antigen Pfa55-14	Pfa55-14	802	G (0.93)	L	A	N/A	Synonymous
NGS_SNP.Pf3D7_08_v3.471056	8	471056	0	3.2065	0.188325	NGS_SNP.Pf3D7_08_v3.469505	Pf3D7_08_v3: 469,505	PF3D7_0809200	Pf3D7_08_v3:467,507..472,481(-)	asparagine-rich antigen Pfa55-14	Pfa55-14	797	C (0.93)	D	T	N	Has Non-Synonymous
NGS_SNP.Pf3D7_08_v3.494182	8	494182	0	0	0.672707	NGS_SNP.Pf3D7_08_v3.471056	Pf3D7_08_v3: 471,056	PF3D7_0809200	Pf3D7_08_v3:467,507..472,481(-)	asparagine-rich antigen Pfa55-14	Pfa55-14	280	T (0.99)	I	A	L	Has Non-Synonymous
NGS_SNP.Pf3D7_08_v3.693543	8	693543	0	0.0164932	0.894358	NGS_SNP.Pf3D7_08_v3.494182	Pf3D7_08_v3: 494,182	PF3D7_0809600	Pf3D7_08_v3:479,438..497,431(-)	peptidase family C50, putative	N/A	1067	G (0.97)	L	C	N/A	Synonymous
NGS_SNP.Pf3D7_08_v3.845431	8	845431	0	0	0.850211	NGS_SNP.Pf3D7_08_v3.693543	Pf3D7_08_v3: 693,543	PF3D7_0814300	Pf3D7_08_v3:690,182..694,542(-)	AAA family ATPase, putative	PBLP	201	A (0.93)	L	G	N/A	Synonymous
NGS_SNP.Pf3D7_08_v3.919594	8	919594	0.0176811	0	0.804855	NGS_SNP.Pf3D7_08_v3.845431	Pf3D7_08_v3: 845,431	PF3D7_0818600	Pf3D7_08_v3:844,765..847,530(-)	BEM46-like protein, putative	N/A	244	A (0.74)	L	G	S	Has Non-Synonymous
NGS_SNP.Pf3D7_08_v3.920148	8	920148	0	0	0.735916	NGS_SNP.Pf3D7_08_v3.919594	Pf3D7_08_v3: 919,594	PF3D7_0820300	Pf3D7_08_v3:917,497..921,911(+)	conserved Plasmodium protein, unknown function	N/A	180	C (0.76)	H	T	N/A	Synonymous
NGS_SNP.Pf3D7_08_v3.1310722	8	1310722	0	1.81308	0	NGS_SNP.Pf3D7_08_v3.920148	Pf3D7_08_v3: 920,148	PF3D7_0820300	Pf3D7_08_v3:917,497..921,911(+)	conserved Plasmodium protein, unknown function	N/A	365	T (0.86)	L	C	S	Has Non-Synonymous
NGS_SNP.Pf3D7_09_v3.289877	9	289877	0	0.0051219	2.04512	NGS_SNP.Pf3D7_09_v3.289877	Pf3D7_09_v3: 289,877	PF3D7_0905800	Pf3D7_09_v3:287,480..293,011(+)	conserved Plasmodium protein, unknown function	N/A	276	T (0.85)	N	C	N/A	Synonymous
NGS_SNP.Pf3D7_10_v3.217709	10	217709	0.113561	0.255583	0.761972	NGS_SNP.Pf3D7_10_v3.1392360	Pf3D7_10_v3: 1,392,360	PF3D7_1035100	Pf3D7_10_v3:1,391,390..1,393,405(+)	probable protein, unknown function	pp	306	A (0.88)	T	T	S	Has Non-Synonymous
NGS_SNP.Pf3D7_10_v3.218214	10	218214	0.00427769	0	1.23637	NGS_SNP.Pf3D7_10_v3.1392364	Pf3D7_10_v3: 1,392,364	PF3D7_1035100	Pf3D7_10_v3:1,391,390..1,393,405(+)	probable protein, unknown function	pp	307	T (0.88)	V	A	E	Has Non-Synonymous
NGS_SNP.Pf3D7_10_v3.218459	10	218459	0.00693214	0.0141297	2.0943	NGS_SNP.Pf3D7_10_v3.1392443	Pf3D7_10_v3: 1,392,443	PF3D7_1035100	Pf3D7_10_v3:1,391,390..1,393,405(+)	probable protein, unknown function	pp	333	C (0.74)	P	T	S	Has Non-Synonymous
NGS_SNP.Pf3D7_10_v3.218859	10	218859	0	0	2.18167	NGS_SNP.Pf3D7_10_v3.1392449	Pf3D7_10_v3: 1,392,449	PF3D7_1035100	Pf3D7_10_v3:1,391,390..1,393,405(+)	probable protein, unknown function	pp	335	A (0.74)	T	G	N/A	Synonymous
NGS_SNP.Pf3D7_10_v3.1392360	10	1392360	0	1.51011	0	NGS_SNP.Pf3D7_10_v3.217709	Pf3D7_10_v3: 217,709	PF3D7_1004600	Pf3D7_10_v3:215,344..219,759(+)	conserved Plasmodium membrane protein, unknown function	N/A	557	A (0.69)	I	G	M	Has Non-Synonymous
NGS_SNP.Pf3D7_10_v3.1392364	10	1392364	0	1.51011	0	NGS_SNP.Pf3D7_10_v3.218214	Pf3D7_10_v3: 218,214	PF3D7_1004600	Pf3D7_10_v3:215,344..219,759(+)	conserved Plasmodium membrane protein, unknown function	N/A	726	C (0.76)	H	T	Y	Has Non-Synonymous
NGS_SNP.Pf3D7_10_v3.1392443	10	1392443	0	1.62134	0	NGS_SNP.Pf3D7_10_v3.218459	Pf3D7_10_v3: 218,459	PF3D7_1004600	Pf3D7_10_v3:215,344..219,759(+)	conserved Plasmodium membrane protein, unknown function	N/A	807	T (0.63)	V	C	N/A	Synonymous
NGS_SNP.Pf3D7_10_v3.1392449	10	1392449	0	1.62134	0	NGS_SNP.Pf3D7_10_v3.218859	Pf3D7_10_v3: 218,859	PF3D7_1004600	Pf3D7_10_v3:215,344..219,759(+)	conserved Plasmodium membrane protein, unknown function	N/A	892	C (0.61)	F	T	N/A	Synonymous
NGS_SNP.Pf3D7_12_v3.659819	12	659819	0.552461	1.61071	0.00488289	NGS_SNP.Pf3D7_12_v3.1559910	Pf3D7_12_v3: 1,559,910	PF3D7_1237400	Pf3D7_12_v3:1,558,660..1,560,695(+)	hydrolase, putative	N/A	202	G (0.88)	D	A	N	Has Non-Synonymous
NGS_SNP.Pf3D7_12_v3.659820	12	659820	0	0.937265	1.28056	NGS_SNP.Pf3D7_12_v3.659819	Pf3D7_12_v3: 659,819	PF3D7_1216600	Pf3D7_12_v3:659,738..660,286(-)	cell traversal protein for ookinetes and sporozoites	CelTOS	156	A (0.88)	N	T	K	Has Non-Synonymous
NGS_SNP.Pf3D7_12_v3.659824	12	659824	0	6.91036	0.0126347	NGS_SNP.Pf3D7_12_v3.659820	Pf3D7_12_v3: 659,820	PF3D7_1216600	Pf3D7_12_v3:659,738..660,286(-)	cell traversal protein for ookinetes and sporozoites	CelTOS	156	T (0.97)	N	C	K	Has Non-Synonymous
NGS_SNP.Pf3D7_12_v3.659836	12	659836	0	7.1411	0	NGS_SNP.Pf3D7_12_v3.659824	Pf3D7_12_v3: 659,824	PF3D7_1216600	Pf3D7_12_v3:659,738..660,286(-)	cell traversal protein for ookinetes and sporozoites	CelTOS	155	C (0.91)	A	T	V	Has Non-Synonymous
NGS_SNP.Pf3D7_12_v3.659920	12	659920	0.0149863	2.70312	0	NGS_SNP.Pf3D7_12_v3.659836	Pf3D7_12_v3: 659,836	PF3D7_1216600	Pf3D7_12_v3:659,738..660,286(-)	cell traversal protein for ookinetes and sporozoites	CelTOS	151	T (0.97)	T	A	S	Has Non-Synonymous
NGS_SNP.Pf3D7_12_v3.659929	12	659929	0.0820941	3.21228	1.52286	NGS_SNP.Pf3D7_12_v3.659920	Pf3D7_12_v3: 659,920	PF3D7_1216600	Pf3D7_12_v3:659,738..660,286(-)	cell traversal protein for ookinetes and sporozoites	CelTOS	123	C (0.92)	E	G	Q	Has Non-Synonymous
NGS_SNP.Pf3D7_12_v3.1559910	12	1559910	0	0.0080903	0.846074	NGS_SNP.Pf3D7_12_v3.659929	Pf3D7_12_v3: 659,929	PF3D7_1216600	Pf3D7_12_v3:659,738..660,286(-)	cell traversal protein for ookinetes and sporozoites	CelTOS	120	G (0.52)	L	C	V	Has Non-Synonymous
NGS_SNP.Pf3D7_13_v3.780503	13	780503	0	0.00529737	0.879482	NGS_SNP.Pf3D7_13_v3.1419424	Pf3D7_13_v3: 1,419,424	PF3D7_1335100	Pf3D7_13_v3:1,418,213..1,421,552(-)	merozoite surface protein 7	MSP7	240	A (0.51)	Y	G	H	Has Non-Synonymous
NGS_SNP.Pf3D7_13_v3.1419424	13	1419424	0.00522996	0.270879	2.53246	NGS_SNP.Pf3D7_13_v3.1419448	Pf3D7_13_v3: 1,419,448	PF3D7_1335100	Pf3D7_13_v3:1,418,213..1,421,552(-)	merozoite surface protein 7	MSP7	232	C (0.69)	E	T	K	Has Non-Synonymous
NGS_SNP.Pf3D7_13_v3.1419448	13	1419448	0.267296	1.8924	2.07257	NGS_SNP.Pf3D7_13_v3.1465680	Pf3D7_13_v3: 1,465,680	PF3D7_1335900	Pf3D7_13_v3:1,464,895..1,466,619(-)	thrombospondin-related anonymous protein	TRAP	314	C (0.76)	E	G	Q	Has Non-Synonymous
NGS_SNP.Pf3D7_13_v3.1465680	13	1465680	0	2.60219	0	NGS_SNP.Pf3D7_13_v3.1465686	Pf3D7_13_v3: 1,465,686	PF3D7_1335900	Pf3D7_13_v3:1,464,895..1,466,619(-)	thrombospondin-related anonymous protein	TRAP	312	C (0.83)	A	A	V	Has Non-Synonymous
NGS_SNP.Pf3D7_13_v3.1465686	13	1465686	0	5.00826	0	NGS_SNP.Pf3D7_13_v3.1465688	Pf3D7_13_v3: 1,465,688	PF3D7_1335900	Pf3D7_13_v3:1,464,895..1,466,619(-)	thrombospondin-related anonymous protein	TRAP	311	A (0.83)	F	G	S	Has Non-Synonymous
NGS_SNP.Pf3D7_13_v3.1465688	13	1465688	0	5.00826	0	NGS_SNP.Pf3D7_13_v3.1465760	Pf3D7_13_v3: 1,465,760	PF3D7_1335900	Pf3D7_13_v3:1,464,895..1,466,619(-)	thrombospondin-related anonymous protein	TRAP	287	G (0.95)	P	A	L	Has Non-Synonymous
NGS_SNP.Pf3D7_13_v3.1465760	13	1465760	0	3.90982	0	NGS_SNP.Pf3D7_13_v3.1466084	Pf3D7_13_v3: 1,466,084	PF3D7_1335900	Pf3D7_13_v3:1,464,895..1,466,619(-)	thrombospondin-related anonymous protein	TRAP	179	T (0.66)	N	C	S	Has Non-Synonymous
NGS_SNP.Pf3D7_13_v3.1466084	13	1466084	0.0248237	2.29333	0	NGS_SNP.Pf3D7_13_v3.1466124	Pf3D7_13_v3: 1,466,124	PF3D7_1335900	Pf3D7_13_v3:1,464,895..1,466,619(-)	thrombospondin-related anonymous protein	TRAP	166	C (0.75)	D	T	N	Has Non-Synonymous
NGS_SNP.Pf3D7_13_v3.1466124	13	1466124	1.33299	4.28548	0	NGS_SNP.Pf3D7_13_v3.1466219	Pf3D7_13_v3: 1,466,219	PF3D7_1335900	Pf3D7_13_v3:1,464,895..1,466,619(-)	thrombospondin-related anonymous protein	TRAP	134	G (0.6)	T	C	S	Has Non-Synonymous
NGS_SNP.Pf3D7_13_v3.1466219	13	1466219	0.00758562	7.86361	0	NGS_SNP.Pf3D7_13_v3.1466348	Pf3D7_13_v3: 1,466,348	PF3D7_1335900	Pf3D7_13_v3:1,464,895..1,466,619(-)	thrombospondin-related anonymous protein	TRAP	91	T (0.9)	N	C	S	Has Non-Synonymous
NGS_SNP.Pf3D7_13_v3.1466348	13	1466348	0	1.9565	0	NGS_SNP.Pf3D7_13_v3.2114576	Pf3D7_13_v3: 2,114,576	PF3D7_1352900	Pf3D7_13_v3:2,113,577..2,116,771(-)	Plasmodium exported protein, unknown function	N/A	444	T (0.91)	M	A	L	Has Non-Synonymous
NGS_SNP.Pf3D7_13_v3.2114576	13	2114576	0	1.91415	0	NGS_SNP.Pf3D7_13_v3.2115023	Pf3D7_13_v3: 2,115,023	PF3D7_1352900	Pf3D7_13_v3:2,113,577..2,116,771(-)	Plasmodium exported protein, unknown function	N/A	295	T (0.99)	N	G	H	Has Non-Synonymous
NGS_SNP.Pf3D7_13_v3.2115023	13	2115023	0	3.34584	0	NGS_SNP.Pf3D7_13_v3.780503	Pf3D7_13_v3: 780,503	PF3D7_1318900	Pf3D7_13_v3:778,097..781,679(+)	conserved Plasmodium protein, unknown function	N/A	190	C (0.96)	N	G	K	Has Non-Synonymous
NGS_SNP.Pf3D7_14_v3.3121223	14	3121223	0	1.69898	0	NGS_SNP.Pf3D7_14_v3.3121223	Pf3D7_14_v3: 3,121,223	PF3D7_1475800	Pf3D7_14_v3:3,120,854..3,121,849(+)	conserved Plasmodium protein, unknown function	N/A	124	G (0.52)	E	C	Q	Has Non-Synonymous
NGS_SNP.Pf3D7_14_v3.3121227	14	3121227	0	3.50447	0	NGS_SNP.Pf3D7_14_v3.3121227	Pf3D7_14_v3: 3,121,227	PF3D7_1475800	Pf3D7_14_v3:3,120,854..3,121,849(+)	conserved Plasmodium protein, unknown function	N/A	125	A (0.77)	H	G	R	Has Non-Synonymous
NGS_SNP.Pf3D7_14_v3.3121290	14	3121290	0.00727528	2.25843	0	NGS_SNP.Pf3D7_14_v3.3121290	Pf3D7_14_v3: 3,121,290	PF3D7_1475800	Pf3D7_14_v3:3,120,854..3,121,849(+)	conserved Plasmodium protein, unknown function	N/A	146	T (0.85)	L	C	S	Has Non-Synonymous
NGS_SNP.Pf3D7_14_v3.3121362	14	3121362	0	3.27466	0	NGS_SNP.Pf3D7_14_v3.3121362	Pf3D7_14_v3: 3,121,362	PF3D7_1475800	Pf3D7_14_v3:3,120,854..3,121,849(+)	conserved Plasmodium protein, unknown function	N/A	170	C (0.59)	P	A	H	Has Non-Synonymous
NGS_SNP.Pf3D7_14_v3.3121373	14	3121373	0	12.428	0	NGS_SNP.Pf3D7_14_v3.3121373	Pf3D7_14_v3: 3,121,373	PF3D7_1475800	Pf3D7_14_v3:3,120,854..3,121,849(+)	conserved Plasmodium protein, unknown function	N/A	174	A (0.99)	T	G	A	Has Non-Synonymous
NGS_SNP.Pf3D7_14_v3.3121408	14	3121408	1.07406	0.118288	0	NGS_SNP.Pf3D7_14_v3.3121408	Pf3D7_14_v3: 3,121,408	PF3D7_1475800	Pf3D7_14_v3:3,120,854..3,121,849(+)	conserved Plasmodium protein, unknown function	N/A	185	C (0.61)	I	G	M	Has Non-Synonymous

## Sheet: Table_S7_topRSb genes
Table S7. Genes in top genomic windows of differential extended haplotype homozygosity detected by pairwise Rsb between geo-temporal populations. nsSNP=nonsynonymous SNP, and sSNP=synonympus SNP
Gene ID	nsSnp	sSnp	total_snp	Genomic Location(gene)	Product description	Gene Name
PF3D7_0104100	3		3	Pf3D7_01_v3:177,187..181,825(+)	protein E140, putative	PF3D7_0104100
PF3D7_0113100	9		9	Pf3D7_01_v3:494,941..500,347(+)	surface-associated interspersed protein 1.1	SURF1.1
PF3D7_0113800	6	1	7	Pf3D7_01_v3:526,530..536,562(+)	DBL containing protein, unknown function	PF3D7_0113800
PF3D7_0304600	2		2	Pf3D7_03_v3:221,112..223,145(-)	circumsporozoite (CS) protein	CSP
PF3D7_0308100	3		3	Pf3D7_03_v3:355,867..361,936(+)	zinc finger protein, putative	PF3D7_0308100
PF3D7_0401900	1		1	Pf3D7_04_v3:108,357..111,662(-)	acyl-CoA synthetase	ACS6
PF3D7_0402300	4		4	Pf3D7_04_v3:137,006..147,177(+)	reticulocyte binding protein homologue 1	RH1
PF3D7_0408700	1		1	Pf3D7_04_v3:417,372..420,824(-)	perforin-like protein 1	PLP1
PF3D7_0421700	14	11	25	Pf3D7_04_v3:987,842..994,360(-)	conserved Plasmodium protein, unknown function	PF3D7_0421700
PF3D7_0422500	2	1	3	Pf3D7_04_v3:1,029,062..1,038,336(+)	pre-mRNA-splicing helicase BRR2, putative	BRR2
PF3D7_0511300	5	2	7	Pf3D7_05_v3:474,407..478,999(-)	MORN repeat protein, putative	PF3D7_0511300
PF3D7_0708200	26	9	35	Pf3D7_07_v3:374,243..377,393(-)	conserved Plasmodium protein, unknown function	PF3D7_0708200
PF3D7_0709300	25	9	34	Pf3D7_07_v3:413560..422436 (-)	mediator of RNA polymerase II transcription subunit 14, putative	MED14
PF3D7_0709400	4	4	8	Pf3D7_07_v3:422,674..427,278(-)	Cg7 protein	Cg7
PF3D7_0709600	9	11	20	Pf3D7_07_v3:429,537..433,997(-)	ribonucleases P/MRP protein subunit POP1, putative	POP1
PF3D7_0710000	3	2	5	Pf3D7_07_v3:447,209..458,876(-)	conserved Plasmodium protein, unknown function	PF3D7_0710000
PF3D7_0710200	4	2	6	Pf3D7_07_v3:462,183..472,293(+)	conserved Plasmodium protein, unknown function	PF3D7_0710200
PF3D7_0809200	2		2	Pf3D7_08_v3:467,507..472,481(-)	asparagine-rich antigen Pfa55-14	pfa55-14
PF3D7_0830300	2		2	Pf3D7_08_v3:1,290,240..1,291,406(-)	sporozoite invasion-associated protein 2	SIAP2
PF3D7_0830800	3	3	6	Pf3D7_08_v3:1,309,285..1,317,662(+)	surface-associated interspersed protein 8.2 (SURFIN 8.2)	SURF8.2
PF3D7_0903300	1		1	Pf3D7_09_v3:138,715..151,403(+)	conserved Plasmodium protein, unknown function	PF3D7_0903300
PF3D7_0903400	1	1	2	Pf3D7_09_v3:151,318..161,672(-)	ATP-dependent RNA helicase DDX60, putative	DDX60
PF3D7_1035000	1	2	3	Pf3D7_10_v3:1,386,295..1,390,034(-)	U2 snRNA/tRNA pseudouridine synthase, putative	PF3D7_1035000
PF3D7_1035600	2		2	Pf3D7_10_v3:1,409,095..1,410,806(+)	merozoite surface protein	H101
PF3D7_1123000	3	1	4	Pf3D7_11_v3:895,885..906,868(-)	conserved Plasmodium protein, unknown function	PF3D7_1123000
PF3D7_1201400	3		3	Pf3D7_12_v3:93,581..97,146(-)	Plasmodium exported protein, unknown function	PF3D7_1201400
PF3D7_1216600	1		1	Pf3D7_12_v3:659,738..660,286(-)	cell traversal protein for ookinetes and sporozoites	CelTOS
PF3D7_1239800	3	2	5	Pf3D7_12_v3:1,660,331..1,678,083(+)	conserved Plasmodium protein, unknown function	PF3D7_1239800
PF3D7_1335900	4		4	Pf3D7_13_v3:1,464,895..1,466,619(-)	thrombospondin-related anonymous protein	TRAP
PF3D7_1352900	3		3	Pf3D7_13_v3:2,113,577..2,116,771(-)	Plasmodium exported protein, unknown function	PF3D7_1352900
PF3D7_1475800	2		2	Pf3D7_14_v3:3,120,854..3,121,849(+)	conserved Plasmodium protein, unknown function	PF3D7_1475800
PF3D7_1477600	2		2	Pf3D7_14_v3:3,192,675..3,199,877(+)	surface-associated interspersed protein 14.1 (SURFIN 14.1)	SURF14.1

## Sheet: Table_S8_topXPEHH genes
Table S8. Genes in top genomic windows of differential extended haplotype homozygosity detected by pairwise XP-EHH between geo-temporal populations. nsSNP=nonsynonymous SNP, and sSNP=synonympus SNP
GeneID	nsSNP	sSNP	Total_SNP	Genomic location	product description	Gene Name
PF3D7_0104100	1		1	Pf3D7_01_v3:177,187..181,825(+)	protein E140, putative	PF3D7_0104100
PF3D7_0113100	3	1	4	Pf3D7_01_v3:494,941..500,347(+)	surface-associated interspersed protein 1.1	SURF1.1
PF3D7_0113800	3	2	5	Pf3D7_01_v3:526,530..536,562(+)	DBL containing protein, unknown function	PF3D7_0113800
PF3D7_0304600	1		1	Pf3D7_03_v3:221,112..223,145(-)	circumsporozoite (CS) protein	CSP
PF3D7_0308100	1		1	Pf3D7_03_v3:355,867..361,936(+)	zinc finger protein, putative	PF3D7_0308100
PF3D7_0401900	1		1	Pf3D7_04_v3:108,357..111,662(-)	acyl-CoA synthetase	ACS6
PF3D7_0402300	6		6	Pf3D7_04_v3:137,006..147,177(+)	reticulocyte binding protein homologue 1	RH1
PF3D7_0405300	1		1	Pf3D7_04_v3:282,403..288,297(-	liver specific protein 2, putative	LISP2
PF3D7_0421700	11	11	22	Pf3D7_04_v3:987,842..994,360(-)	conserved Plasmodium protein, unknown function	PF3D7_0421700
PF3D7_0422500	4	4	8	Pf3D7_04_v3:1,029,062..1,038,336(+)	pre-mRNA-splicing helicase BRR2, putative	BRR2
PF3D7_0511300	5	3	8	Pf3D7_05_v3:474,407..478,999(-)	MORN repeat protein, putative	PF3D7_0511300
PF3D7_0704600		3	3	Pf3D7_07_v3:214,949..230,713(-)	HECT-type E3 ubiquitin ligase UT	UT
PF3D7_0705200	1	1	2	Pf3D7_07_v3:255,871..260,931(+)	conserved Plasmodium protein, unknown function	PF3D7_0705200
PF3D7_0709300	25	9	34	Pf3D7_07_v3:413,560..422,436(-)	mediator of RNA polymerase II transcription subunit 14, putative	MED14
PF3D7_0709400	1	2	3	Pf3D7_07_v3:422,674..427,278(-)	Cg7 protein	CG7
PF3D7_0709600	4	1	5	Pf3D7_07_v3:429,537..433,997(-)	ribonucleases P/MRP protein subunit POP1, putative	POP1
PF3D7_0710200	4	2	6	Pf3D7_07_v3:462,183..472,293(+)	conserved Plasmodium protein, unknown function	PF3D7_0710200
PF3D7_0808100		1	1	Pf3D7_08_v3:409,306..415,756(+)	AP-3 complex subunit delta, putative	PF3D7_0808100
PF3D7_0809200	2		2	Pf3D7_08_v3:467,507..472,481(-)	asparagine-rich antigen Pfa55-14	pfa55-14
PF3D7_0830300	4		4	Pf3D7_08_v3:1,290,240..1,291,406(-)	sporozoite invasion-associated protein 2	SIAP2
PF3D7_0830800	4	3	7	Pf3D7_08_v3:1,309,285..1,317,662(+)	surface-associated interspersed protein 8.2	SURF8.2
PF3D7_0913900		1	1	Pf3D7_09_v3:594,181..597,274(-)	arginine--tRNA ligase, putative	RSSapi
PF3D7_1033100	1		1	Pf3D7_10_v3:1,323,813..1,331,955(-)	S-adenosylmethionine decarboxylase/ornithine decarboxylase	AdoMetDC/ODC
PF3D7_1035000		3	3	Pf3D7_10_v3:1,386,295..1,390,034(-)	U2 snRNA/tRNA pseudouridine synthase, putative	PF3D7_1035000
PF3D7_1035500	8	1	9	Pf3D7_10_v3:1,406,658..1,409,053(+)	merozoite surface protein 6	MSP6
PF3D7_1035600	2		2	Pf3D7_10_v3:1,409,095..1,410,806(+)	merozoite surface protein	H101
PF3D7_1143800	4	2	6	Pf3D7_11_v3:1,747,226..1,751,441(+)	oocyst capsule protein Cap93, putative	Cap93
PF3D7_1335900	5		5	Pf3D7_13_v3:1,464,895..1,466,619(-)	thrombospondin-related anonymous protein	TRAP
PF3D7_1352900	3		3	Pf3D7_13_v3:2,113,577..2,116,771(-)	Plasmodium exported protein, unknown function	PF3D7_1352900
PF3D7_1475800	2		2	Pf3D7_14_v3:3,120,854..3,121,849(+)	conserved Plasmodium protein, unknown function	PF3D7_1475800
PF3D7_1477600	1		1	Pf3D7_14_v3:3,192,675..3,199,877(+)	surface-associated interspersed protein 14.1	SURF14.1

## Sheet: Table_S9_topCommom_TjDloci
Table S9. Common outlier Tajima's D loci in atleast a pait of geo-temporal populations. Values for each gene and geo-temporal populations are shown and colour coded from yellow to red by magnitude.
Gene	Genomic Location (Gene)	Product Description	Gene Name or Symbol	# TM Domains	SignalP Peptide	Bamako	Bougoula-Hameau	Dangassa	Faladje	Kenieroba	Kolle	nioro	Mean TajD
PF3D7_0102200	Pf3D7_01_v3:97,590..103,615(+)	ring-infected erythrocyte surface antigen	RESA	0		2.98	NA	NA	2.88	2.6	2.24	NA	2.675
PF3D7_0103600	Pf3D7_01_v3:160,673..166,273(+)	ATP-dependent DNA/RNA helicase PSH1	PSH1	1		2.39	2.56	2.3	2.59	2.29	1.65	2.22	2.28571
PF3D7_0113800	Pf3D7_01_v3:526,530..536,562(+)	DBL containing protein, unknown function		0		2.89	1.64	2.21	2.77	2.46	1.9	1.97	2.26286
PF3D7_0220800	Pf3D7_02_v3:838,594..844,668(+)	cytoadherence linked asexual protein 2	CLAG2	0	NN: MVSSVKSSLFLLIFFLYLKKNVIC	2.93	2.25	2.74	3.15	2.38	2.09	2.25	2.54143
PF3D7_0221000	Pf3D7_02_v3:848,092..849,119(+)	Plasmodium exported protein, unknown function		3	NN: MNFCSFIFLFTLTLRVLFA	3.98	3.41	4.61	4.69	4.12	2.82	4.19	3.97429
PF3D7_0302500	Pf3D7_03_v3:134,486..141,185(+)	cytoadherence linked asexual protein 3.1	CLAG3.1	0	NN: MVSFFKTPIFILIIFLYLNEKVIC	3.5	0.35	0.79	3.06	2.68	2.3	0.41	1.87
PF3D7_0412200	Pf3D7_04_v3:541,759..543,070(-)	conserved Plasmodium protein, unknown function		0		2.71	2.06	2.73	2.67	2.46	2.83	2.48	2.56286
PF3D7_0420100	Pf3D7_04_v3:906,263..909,398(+)	serine/threonine protein kinase RIO2	RIO2	0		1.84	1.93	2.55	2.73	2.38	1.81	2.9	2.30571
PF3D7_0420200	Pf3D7_04_v3:909,409..912,119(+)	holo-[acyl-carrier-protein] synthase, putative	ACPS	0		3.15	2.57	3.3	3.31	2.82	3.37	3.19	3.10143
PF3D7_0422800	Pf3D7_04_v3:1,042,564..1,044,896(+)	serpentine receptor 12, putative	SR12	7		3.42	2.51	3.67	3.49	3.37	2.52	3.16	3.16286
PF3D7_0508800	Pf3D7_05_v3:362,856..365,744(-)	single-stranded DNA-binding protein	SSB	0		2.43	1.39	2.72	2.65	2.41	2.31	2.49	2.34286
PF3D7_0511300	Pf3D7_05_v3:474,407..478,999(-)	MORN repeat protein, putative		0		2.27	1.45	2.32	2.33	1.84	2.31	2.64	2.16571
PF3D7_0516300	Pf3D7_05_v3:677,677..681,517(+)	tRNA pseudouridine synthase, putative		1	NN: MNKFFPLLVCVSLIFFFLKLSINA	2.81	1.62	2.77	2.43	2.56	2.22	2.9	2.47286
PF3D7_0529000	Pf3D7_05_v3:1,186,294..1,190,130(-)	T-cell immunomodulatory protein homolog, putative	TIP	2		2.37	2.7	2.42	2.49	2.19	1.74	2.08	2.28429
PF3D7_0619600	Pf3D7_06_v3:824,758..828,098(+)	conserved Plasmodium protein, unknown function		2		3.03	2.4	3.11	3.04	2.59	2.01	2.57	2.67857
PF3D7_0630600	Pf3D7_06_v3:1,279,742..1,283,475(+)	deubiquitinating enzyme MINDY, putative		0		2.97	2.94	3.59	3.41	2.91	2.46	3.17	3.06429
PF3D7_0630800	Pf3D7_06_v3:1,288,066..1,290,942(+)	TPH domain-containing protein, putative		0		2.13	1.71	2.53	2.11	2.05	1.15	2	1.95429
PF3D7_0701900	Pf3D7_07_v3:79,450..83,835(-)	Plasmodium exported protein, unknown function		3		2.51	1.02	1.34	2.41	2.14	1.51	0.98	1.70143
PF3D7_0709000	Pf3D7_07_v3:402,385..406,341(+)	chloroquine resistance transporter	CRT	10		2.5	1.42	2.82	2.53	2.14	2.66	2.52	2.37
PF3D7_0709300	Pf3D7_07_v3:413,560..422,436(-)	mediator of RNA polymerase II transcription subunit 14, putative	MED14	0		1.76	1.85	2.24	2.76	1.94	1.61	2.48	2.09143
PF3D7_0710000	Pf3D7_07_v3:447,209..458,876(-)	conserved Plasmodium protein, unknown function		0		2.75	2.52	2.66	2.89	2.32	2.16	2.84	2.59143
PF3D7_0710200	Pf3D7_07_v3:462,183..472,293(+)	conserved Plasmodium protein, unknown function		0		3.32	1.3	2.24	3.47	3.11	2.22	1.65	2.47286
PF3D7_0711000	Pf3D7_07_v3:486,497..491,719(-)	AAA family ATPase, CDC48 subfamily	CDC48	1		2.74	1.91	2.55	3.12	2.22	2.74	2.43	2.53
PF3D7_0713600	Pf3D7_07_v3:617,889..621,078(+)	ribosomal protein S5, mitochondrial, putative		1		2.46	1.48	2.41	2.61	2.23	1.91	2.36	2.20857
PF3D7_0728900	Pf3D7_07_v3:1,232,210..1,235,443(-)	RNA-binding protein, putative		0		2.33	1.96	2.63	2.67	3.28	3	2.4	2.61
PF3D7_0729700	Pf3D7_07_v3:1,259,830..1,262,801(-)	zinc finger protein, putative		0		2.65	2.9	2.77	2.82	2.2	3	2.76	2.72857
PF3D7_0731500	Pf3D7_07_v3:1,357,251..1,363,653(+)	erythrocyte binding antigen-175	EBA175	1	NN: MKCNISIYFFASFFVLYFAKA	2.78	0.87	1.62	2.78	2.39	1.95	1.53	1.98857
PF3D7_0830800	Pf3D7_08_v3:1,309,285..1,317,662(+)	surface-associated interspersed protein 8.2 (SURFIN 8.2)	SURF8.2	1		3.59	2.3	3.06	3.58	3.04	2.67	2.42	2.95143
PF3D7_0831600	Pf3D7_08_v3:1,358,188..1,363,639(+)	cytoadherence linked asexual protein 8	CLAG8	0	NN: MISYFKVVVFIIFFFLFLKRRVIC	2.15	1.26	2.56	2.31	1.95	1.46	2.1	1.97
PF3D7_1004600	Pf3D7_10_v3:215,344..219,759(+)	conserved Plasmodium membrane protein, unknown function		12		2.79	2.02	2.63	2.69	1.84	1.6	2.3	2.26714
PF3D7_1004800	Pf3D7_10_v3:221,826..223,568(+)	ADP,ATP carrier protein 2	AAC2	5		3.3	2.58	3.21	3.43	2.94	2.62	3.12	3.02857
PF3D7_1036300	Pf3D7_10_v3:1,432,498..1,434,786(+)	duffy binding-like merozoite surface protein 2	DBLMSP2	1		4.64	NA	NA	4.69	4.26	4.05	NA	4.41
PF3D7_1113600	Pf3D7_11_v3:526,884..529,092(+)	conserved Plasmodium protein, unknown function		0		2.76	2.46	2.52	2.49	2.3	2.11	1.72	2.33714
PF3D7_1126100	Pf3D7_11_v3:1,018,358..1,022,935(-)	autophagy-related protein 7, putative	ATG7	0		2.85	2.46	2.79	2.76	2.28	2.07	2.51	2.53143
PF3D7_1133400	Pf3D7_11_v3:1,292,966..1,296,696(+)	apical membrane antigen 1	AMA1	1	NN: MRKLYCVLLLSAFEFTYMINFGRG	2.8	1.08	2.5	2.86	2.59	2.44	1.09	2.19429
PF3D7_1220400	Pf3D7_12_v3:816,430..819,402(+)	debranching enzyme-associated ribonuclease, putative	DRN1	0		2.76	1.96	2.56	2.87	2.27	2.35	2.48	2.46429
PF3D7_1229500	Pf3D7_12_v3:1,210,828..1,214,240(+)	T-complex protein 1 subunit gamma	CCT3	0		2.7	1.9	2.56	2.83	2.48	2.23	2.27	2.42429
PF3D7_1302900	Pf3D7_13_v3:154,555..157,791(+)	conserved protein, unknown function		0		3.71	2.86	3.87	3.71	3.06	2.56	3.15	3.27429
PF3D7_1357000	Pf3D7_13_v3:2,265,717..2,269,459(-)	elongation factor 1-alpha		0		2.65	NA	NA	1.52	2.89	1.21	NA	2.0675
PF3D7_1402900	Pf3D7_14_v3:106,341..109,299(+)	conserved Plasmodium protein, unknown function		1		2.94	2.59	2.84	2.95	3.15	1.86	2.84	2.73857
PF3D7_1409700	Pf3D7_14_v3:377,013..380,614(-)	conserved protein, unknown function		0		2.83	2.54	2.79	2.97	2.45	2.36	3.4	2.76286
*NA is for sites with inadequate data for calculation of Tajima's D
